# Supplementary material for: Discovery of dual-action phenolic 4-arylidene-isoquinolinones with antioxidant and α-glucosidase inhibition activities
Source: Royal Society of Chemistry journal article supplement (doi:10.1039/d3md00585b), 2023-12-04
Supplement: d3md00585b1.pdf [file d3md00585b1.pdf]

# Discovery of phenolic 2-arylidene-isoquinolinones with antioxidant and $\alpha$ -glucosidase inhibition dual action.

**Eduardo Hernández-Vázquez\***, Siseth Martínez-Caballero, Diana Aldana-Torres, Samuel Estrada-Soto, Antonio Nieto-Camacho

*Instituto de Química, Universidad Nacional Autónoma de México, Circuito Exterior, Ciudad Universitaria, Coyoacán  
04510, CDMX, México.*

\*Corresponding author: ehervaz@iquimica.unam.mx

---

---

## Content

|                                                                                                       |            |
|-------------------------------------------------------------------------------------------------------|------------|
| $^1\text{H-NMR}$ and $^{13}\text{C-NMR}$ spectra of $\alpha$ -acylamino carboxamides <b>9a–</b> ..... | <b>S2</b>  |
| $^1\text{H-NMR}$ and $^{13}\text{C-NMR}$ spectra of isoquinolinones <b>10a–r</b> .....                | <b>S23</b> |
| X-ray data .....                                                                                      | <b>S44</b> |
| $\text{IC}_{50}$ data.....                                                                            | <b>S48</b> |
| Cytotoxicity.....                                                                                     | <b>S57</b> |
| Sucrose tolerance tests AUC.....                                                                      | <b>S58</b> |
| Glucose tolerance test.....                                                                           | <b>S60</b> |

$^1\text{H}$ -NMR and  $^{13}\text{C}$ -NMR spectra of  $\alpha$ -acylamino  
carboxamides **9a–r**.

---

---

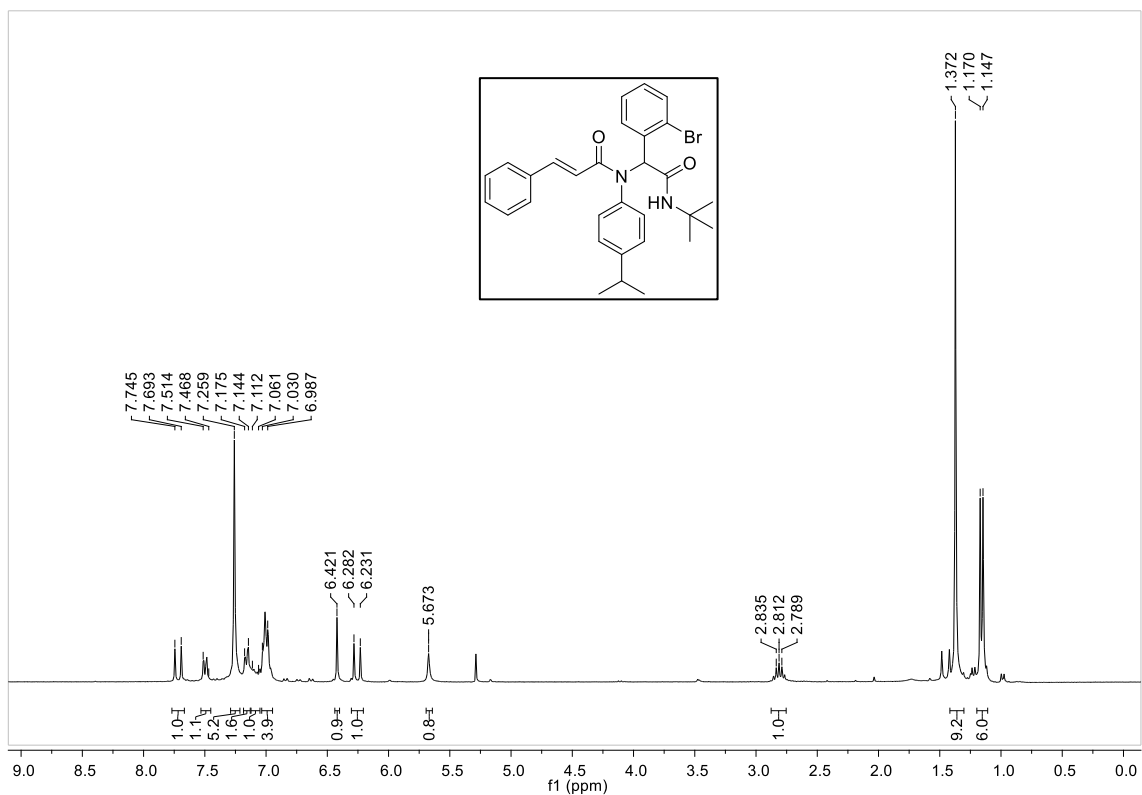

Figure S1.  $^1\text{H-NMR}$  of 9a.

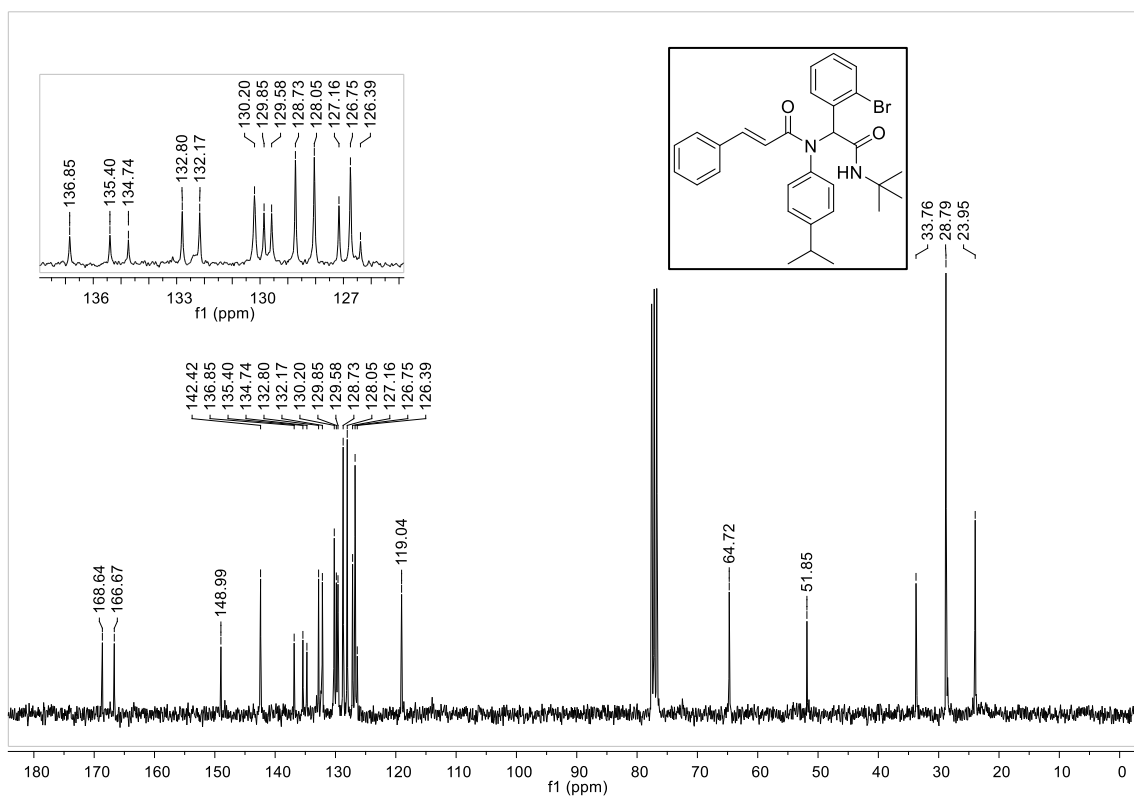

Figure S2.  $^{13}\text{C-NMR}$  of 9a.

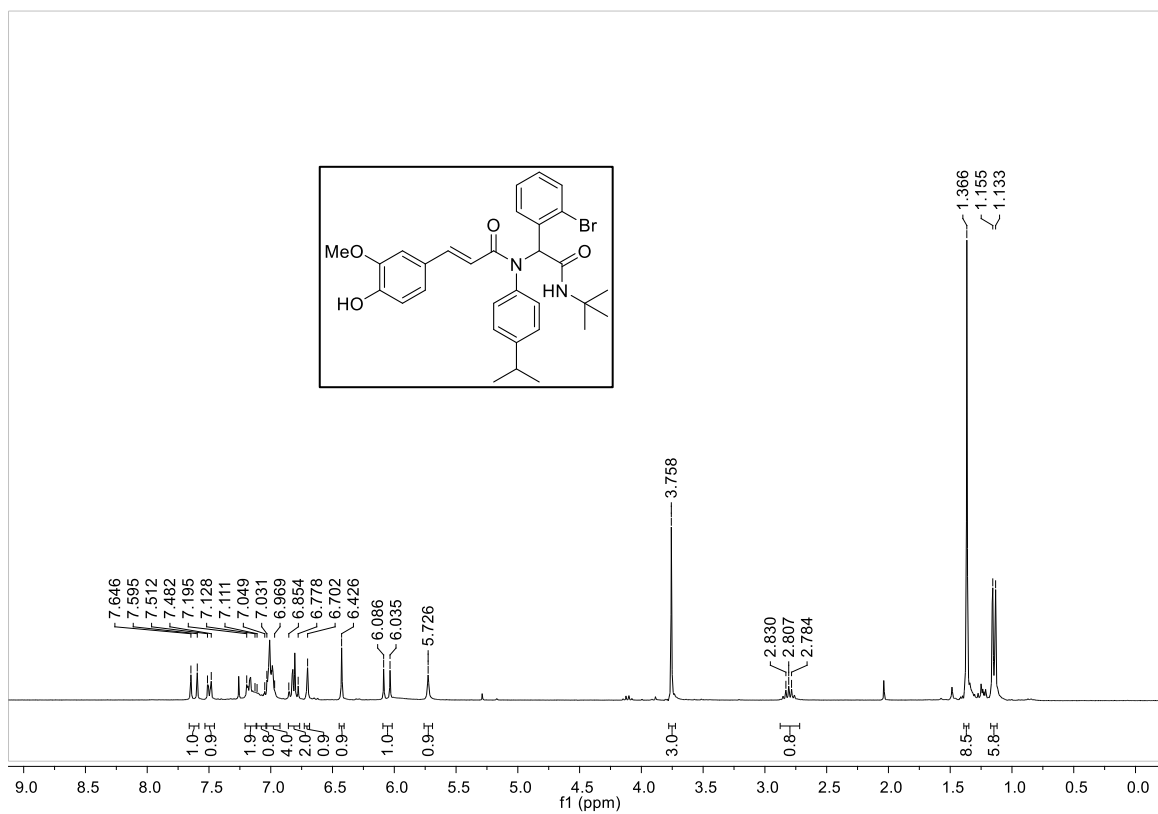

Figure S3. <sup>1</sup>H-NMR of 9b.

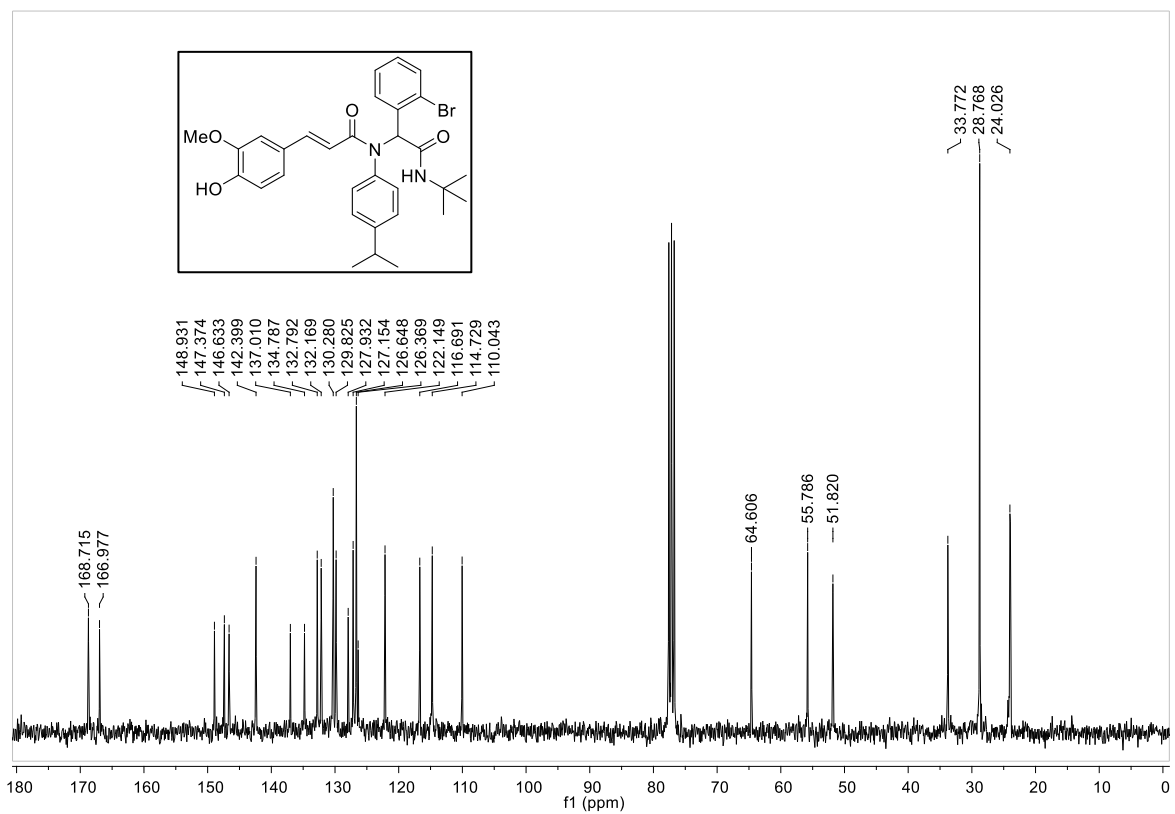

Figure S4. <sup>13</sup>C-NMR of 9b.

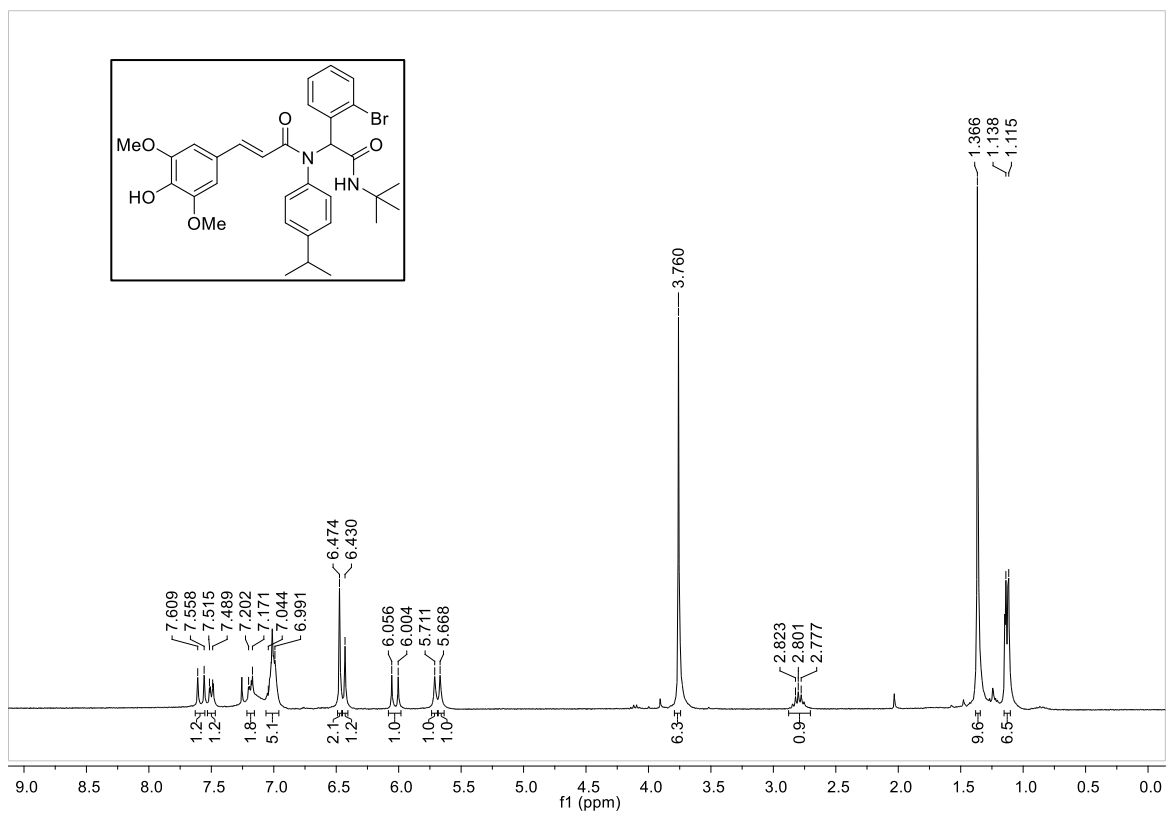

Figure S5. <sup>1</sup>H-NMR of 9c.

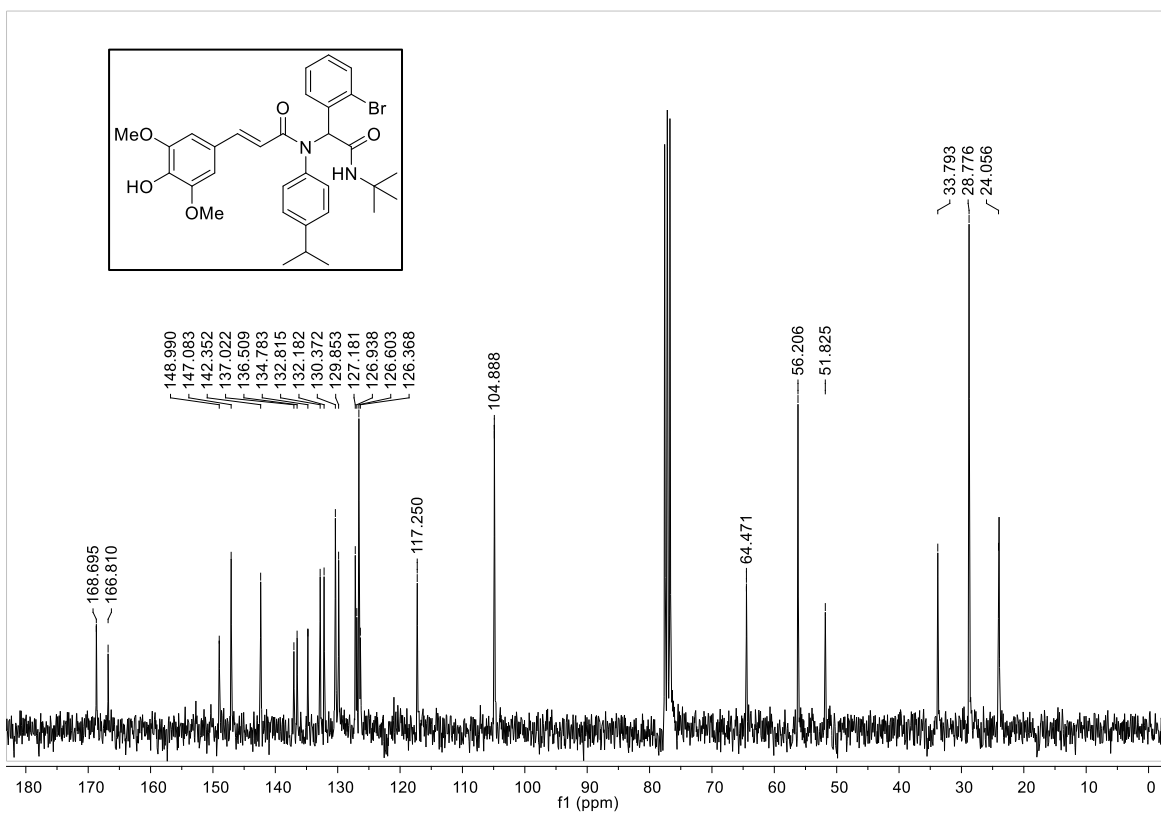

Figure S6.  $^{13}\text{C}$ -NMR of 9c.

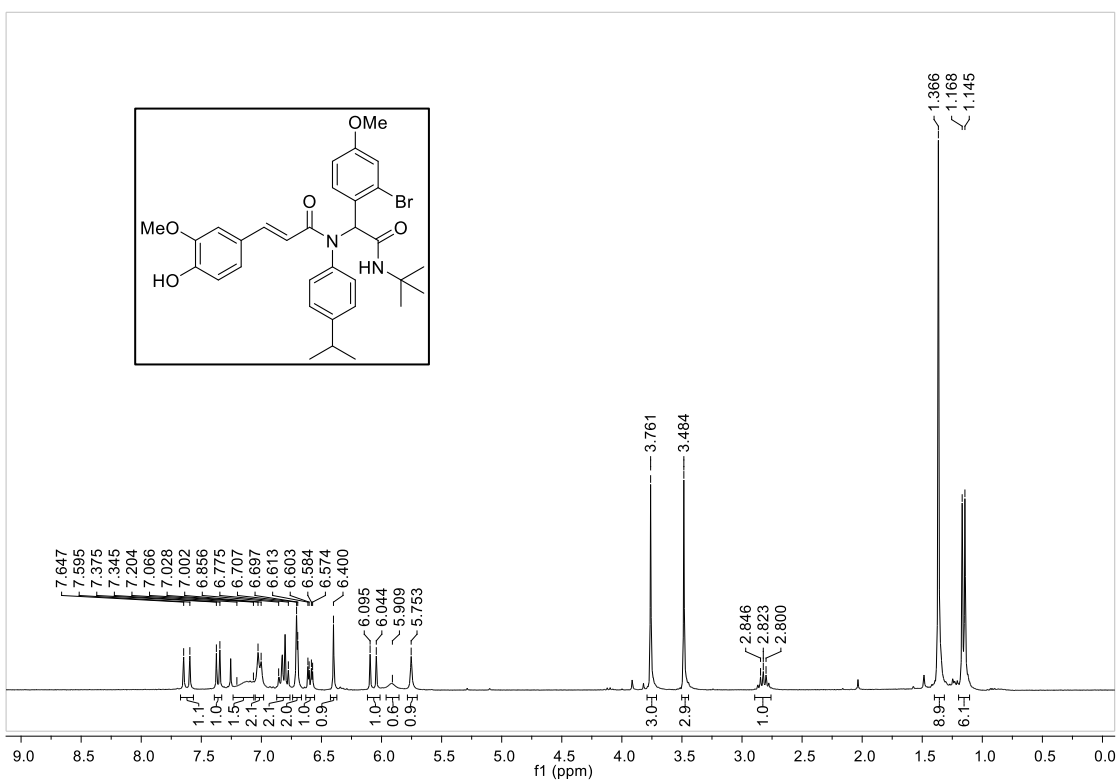

Figure S7.  $^1\text{H}$ -NMR of 9d.

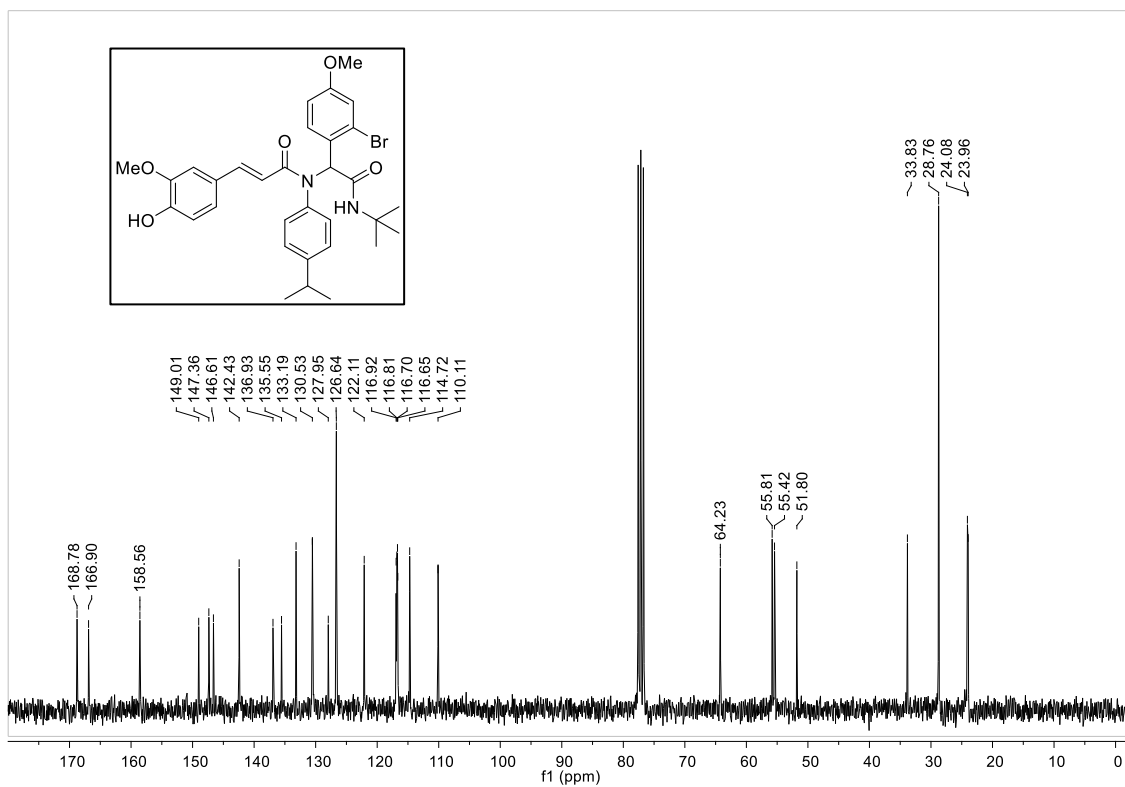

Figure S8. <sup>13</sup>C-NMR of 9d.

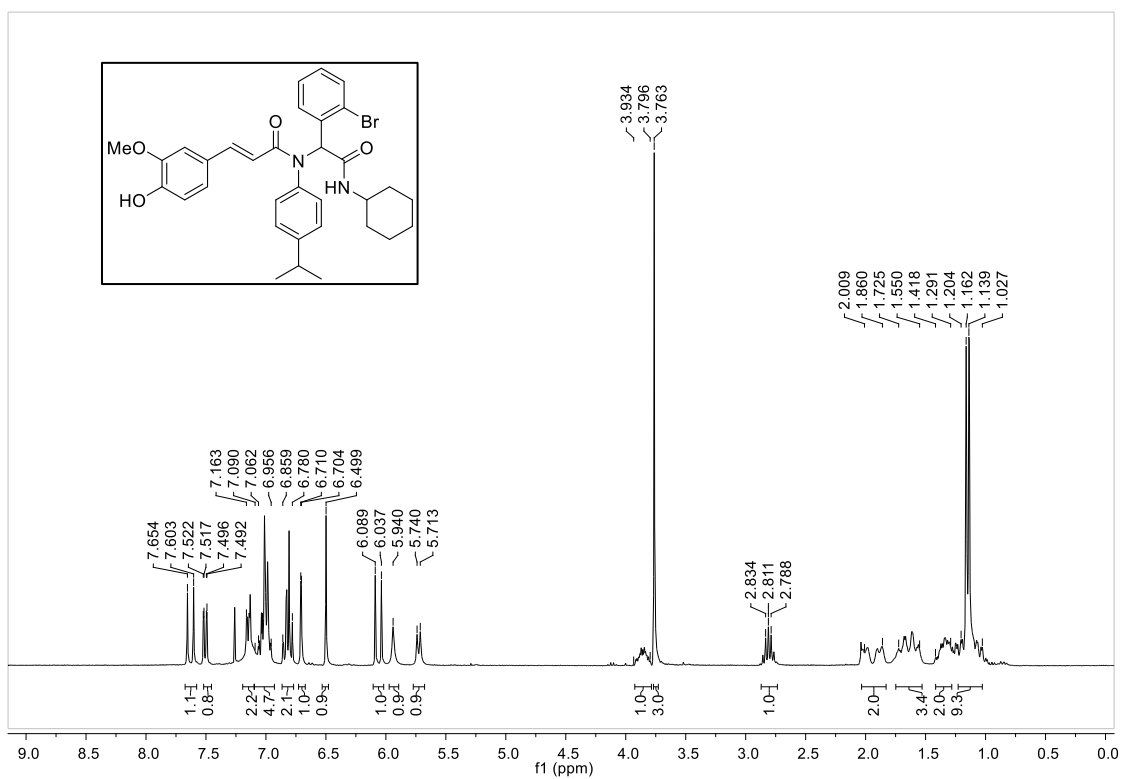

Figure S9. <sup>1</sup>H-NMR of 9e.

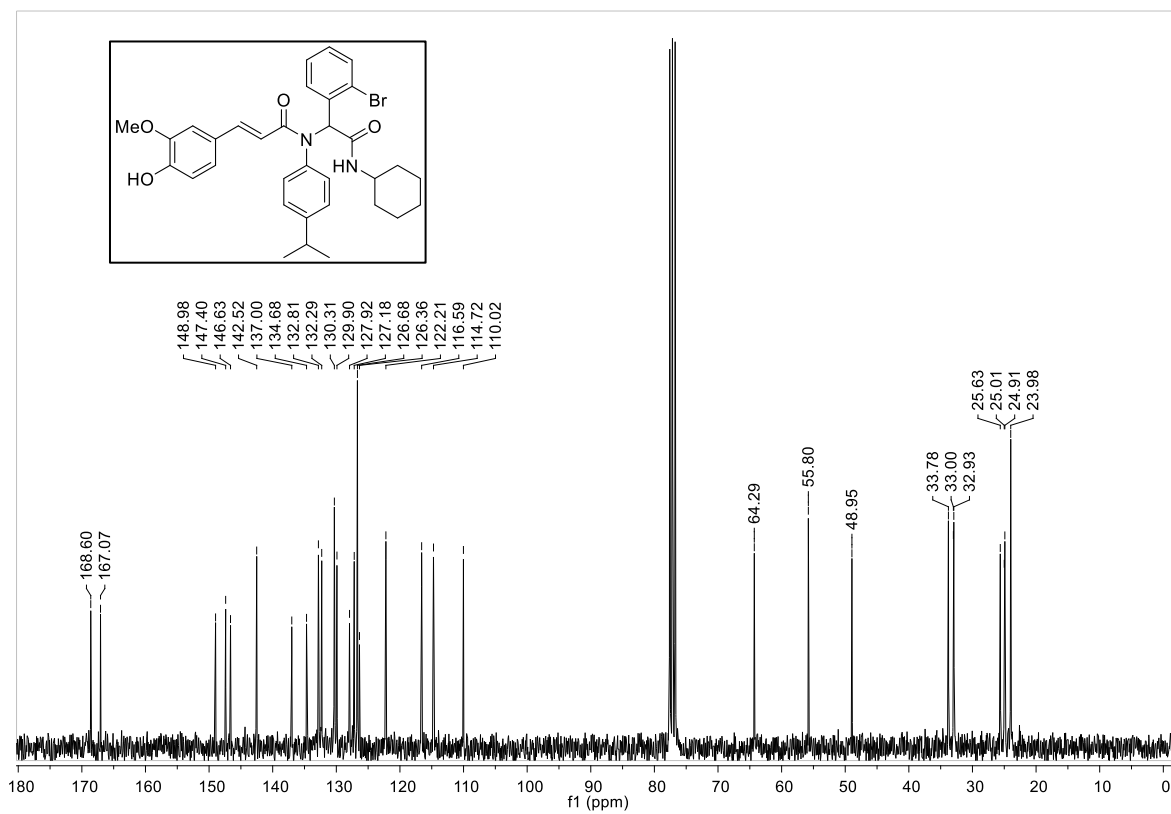

Figure S10. <sup>13</sup>C-NMR of 9e.

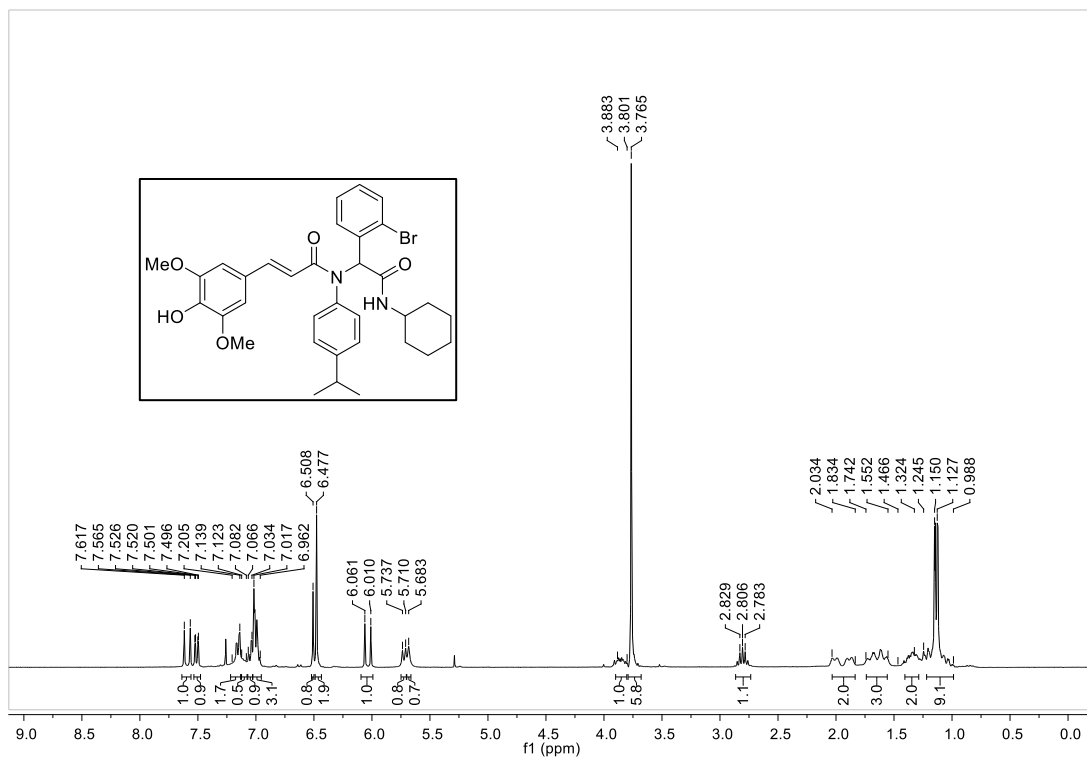

Figure S11. <sup>1</sup>H-NMR of 9f.



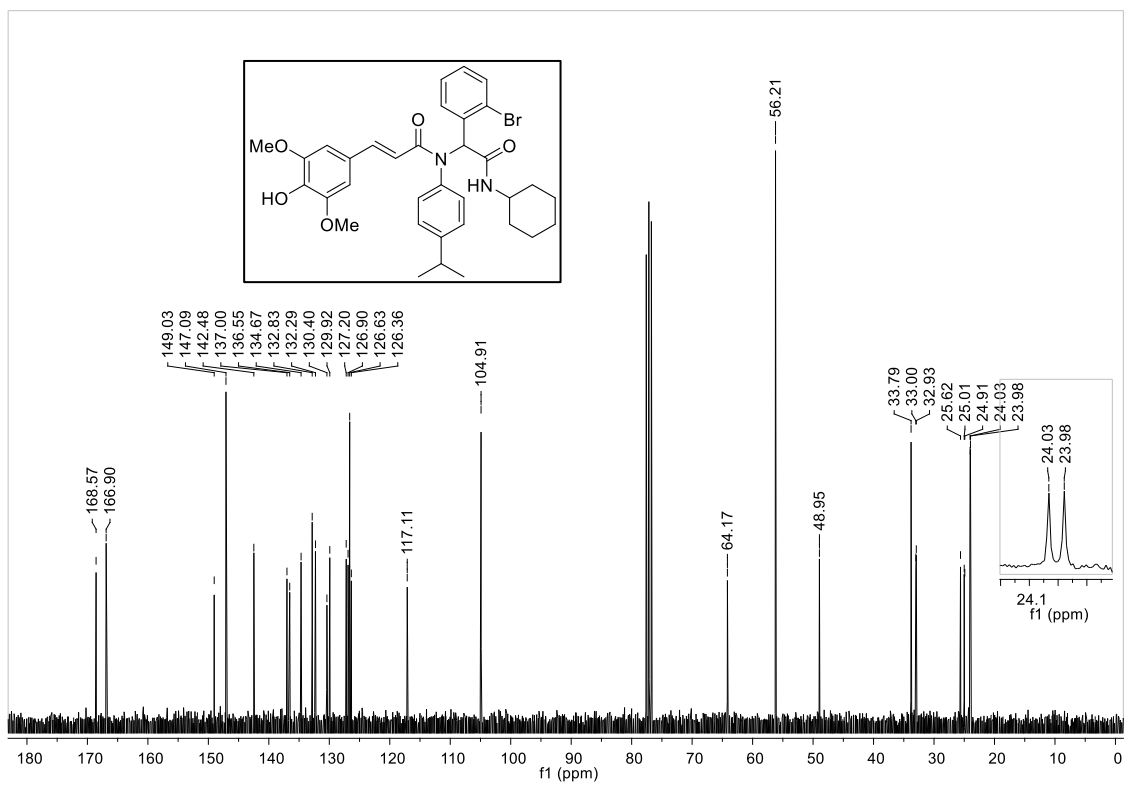

Figure S12. <sup>13</sup>C-NMR of 9f.

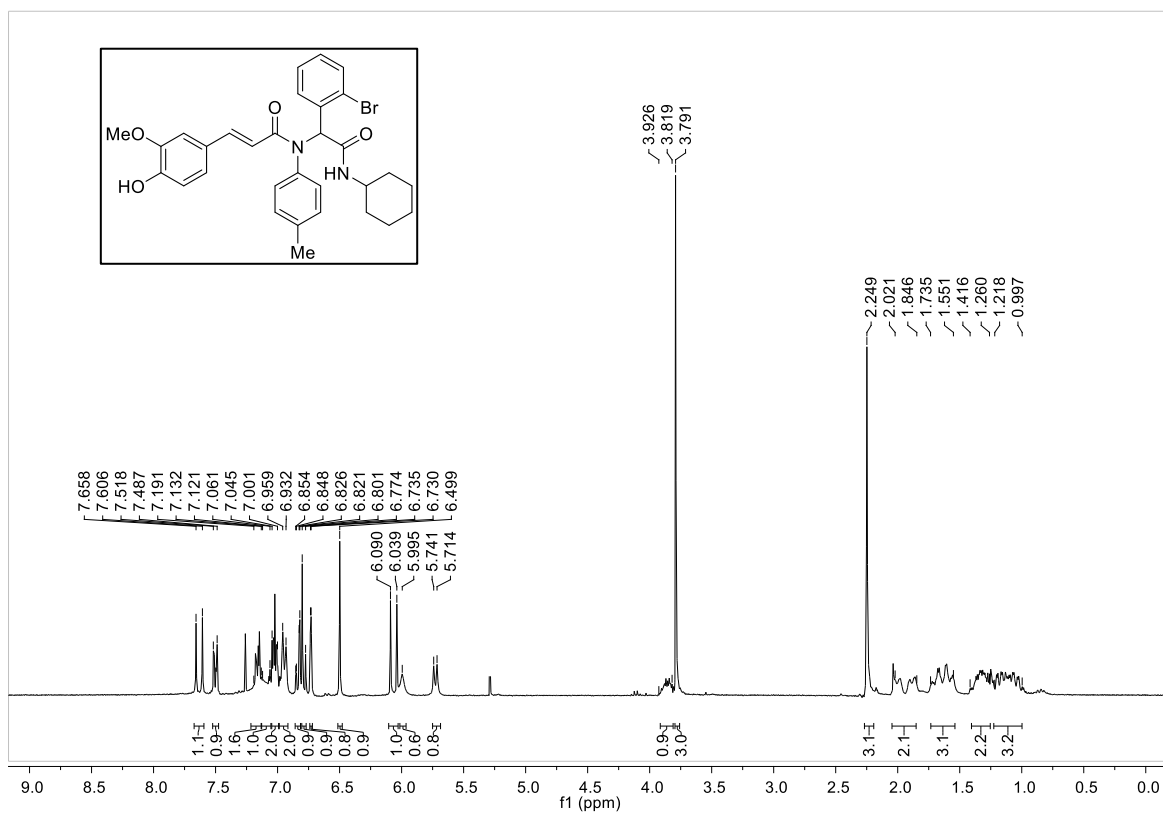

Figure S13. <sup>1</sup>H-NMR of 9g.

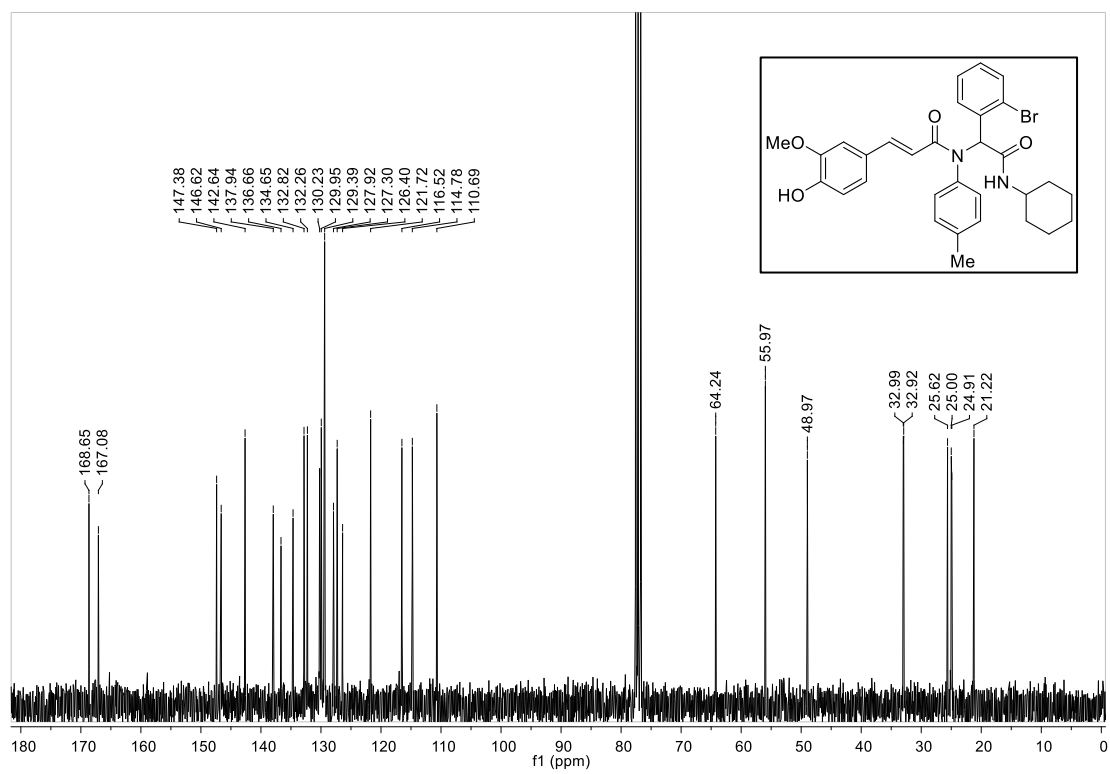

Figure S14. <sup>13</sup>C-NMR of 9g.

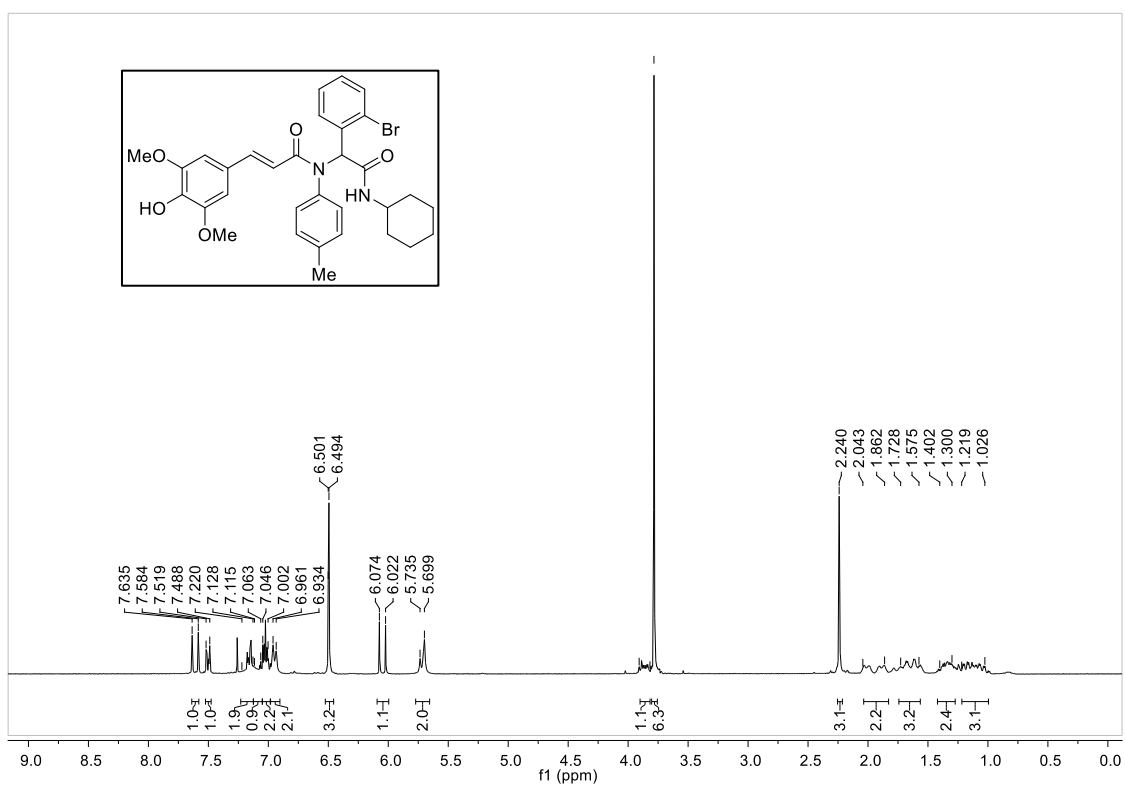

Figure S15. <sup>1</sup>H-NMR of 9h.

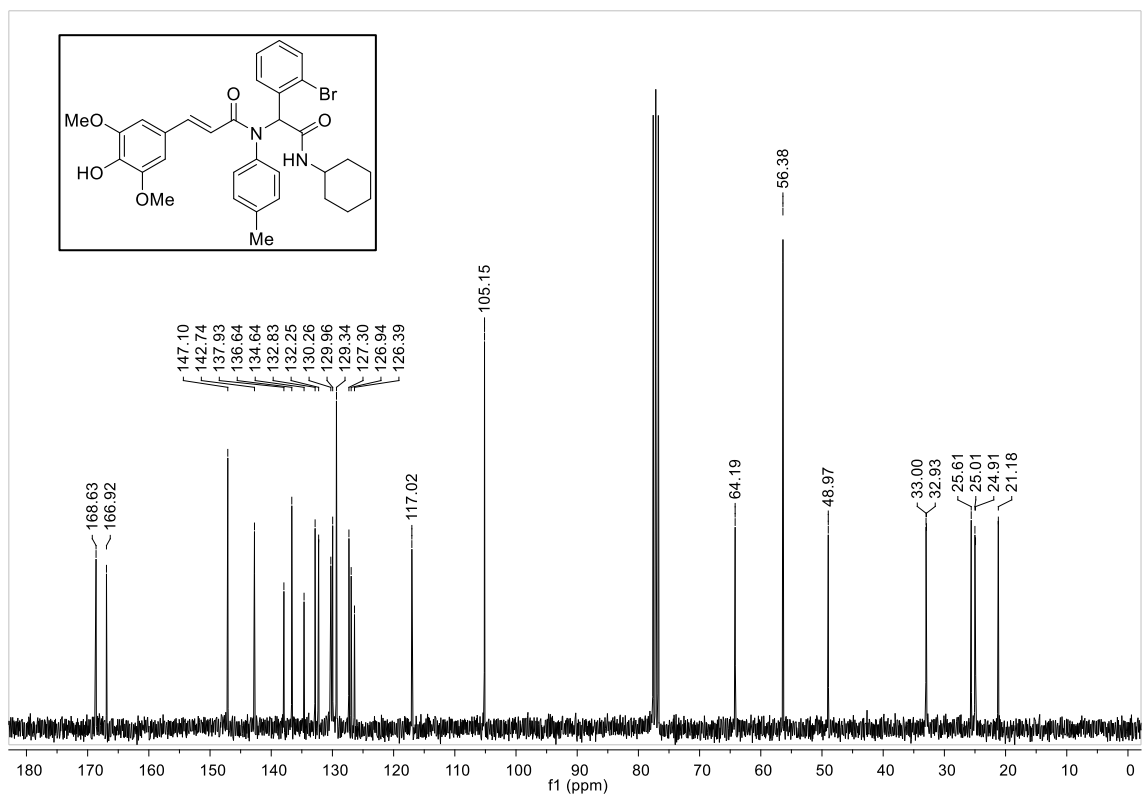

Figure S16. <sup>13</sup>C-NMR of 9h.

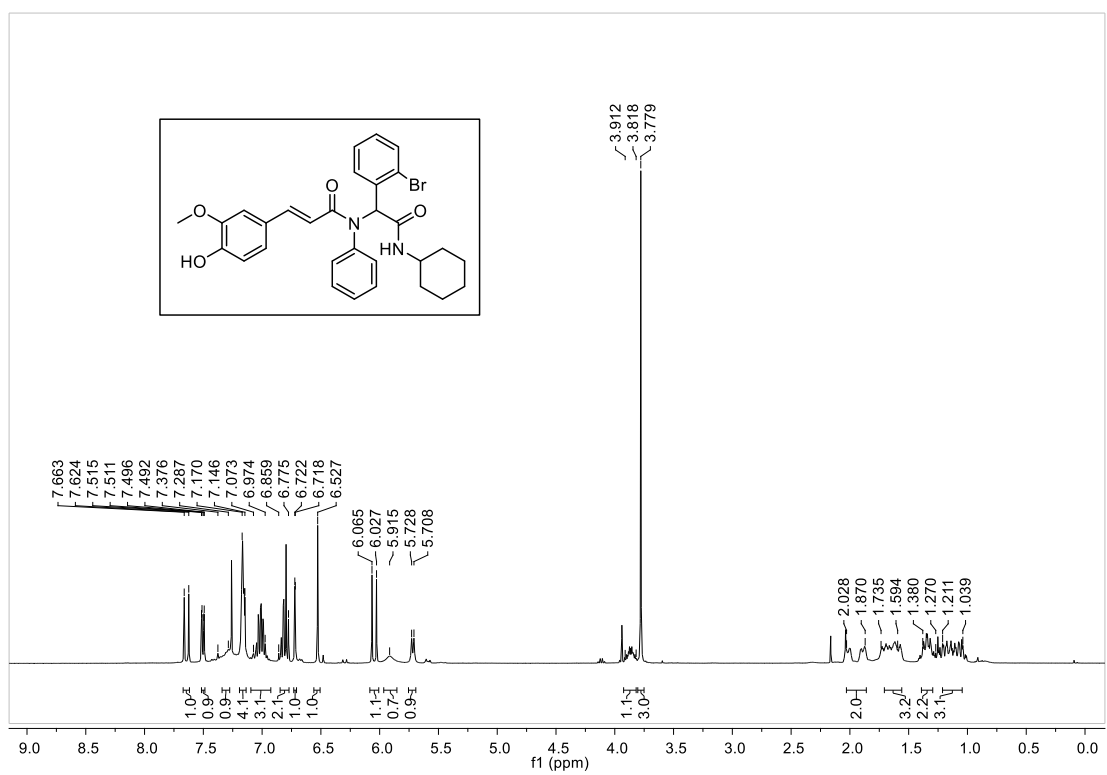

Figure S17. <sup>1</sup>H-NMR of 9i.

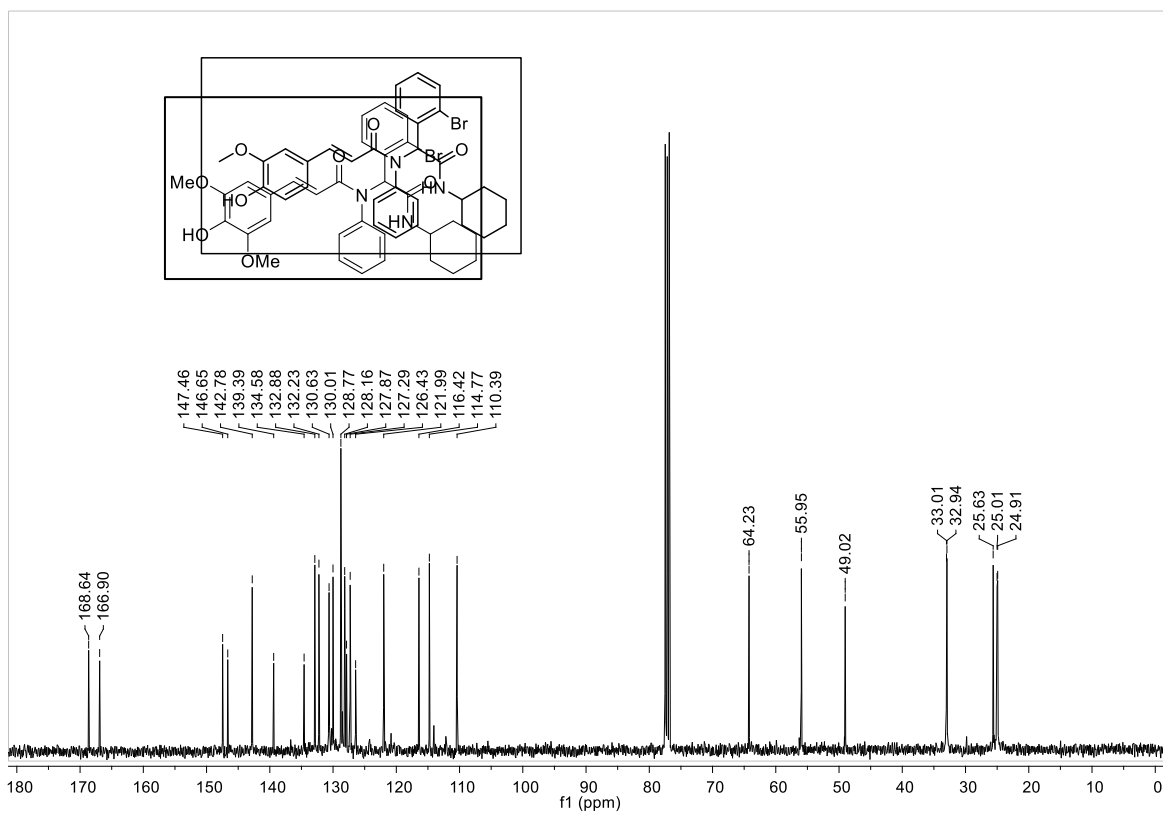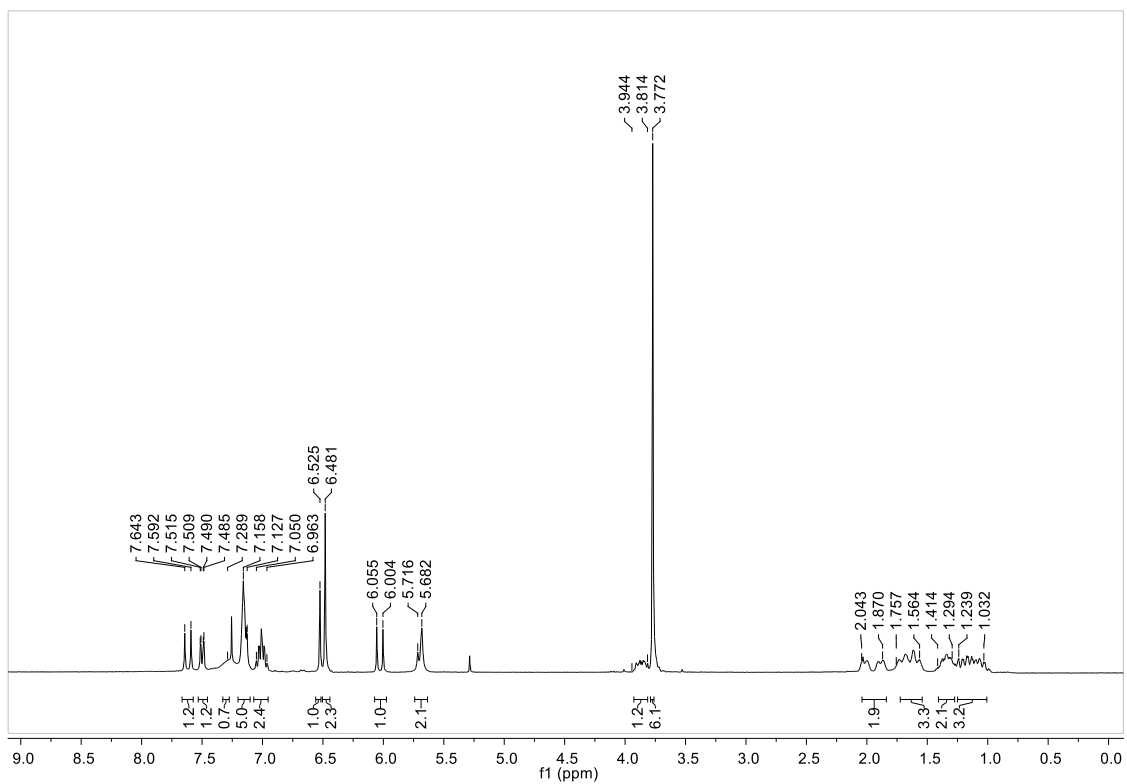

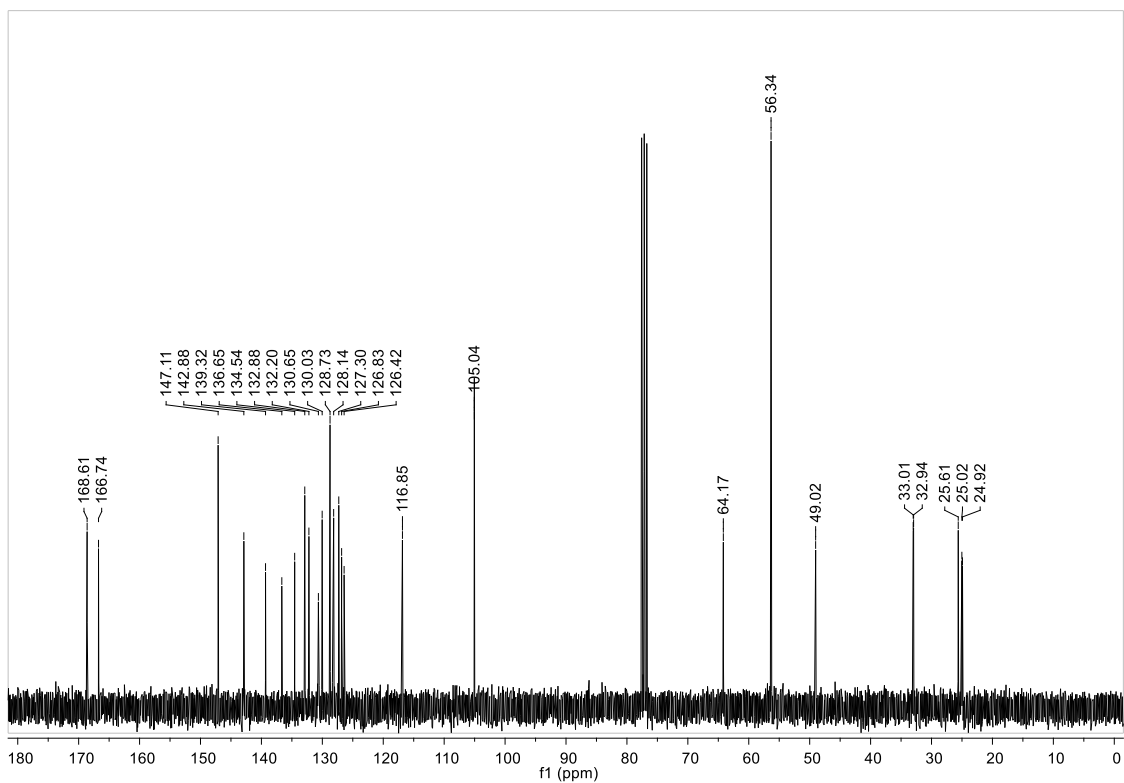

Figure S20.  $^{13}\text{C}$ -NMR of 9j.

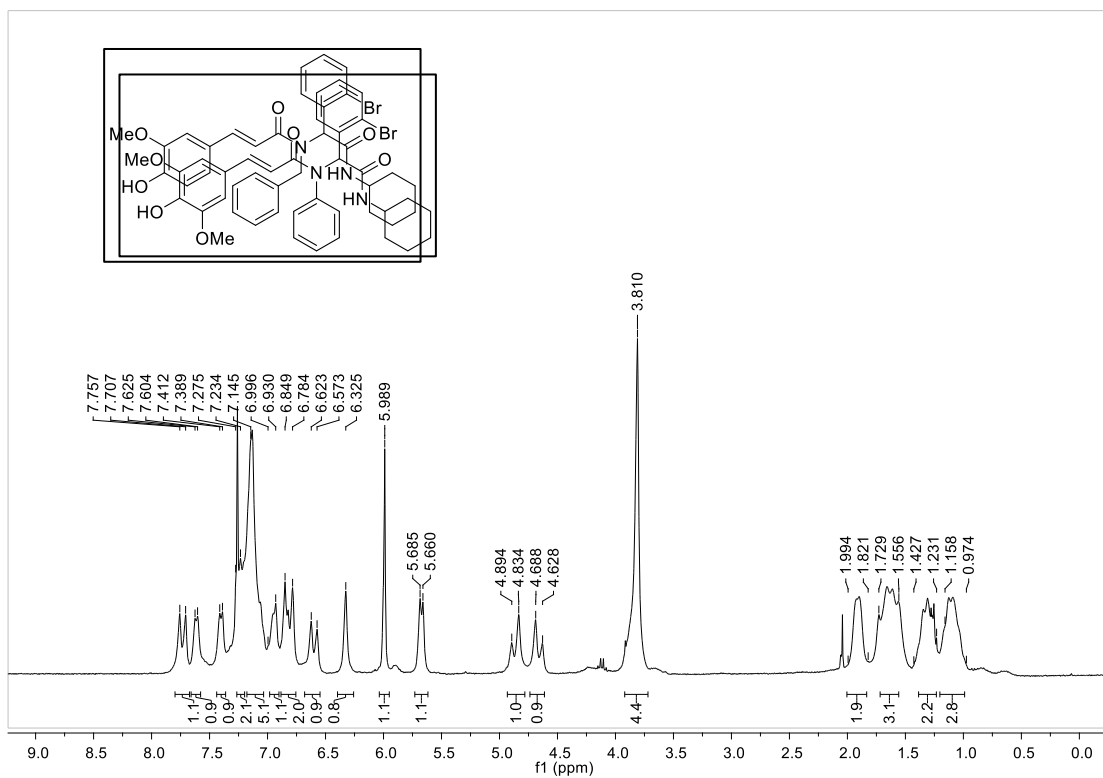

Figure S21.  $^1\text{H}$ -NMR of 9k.

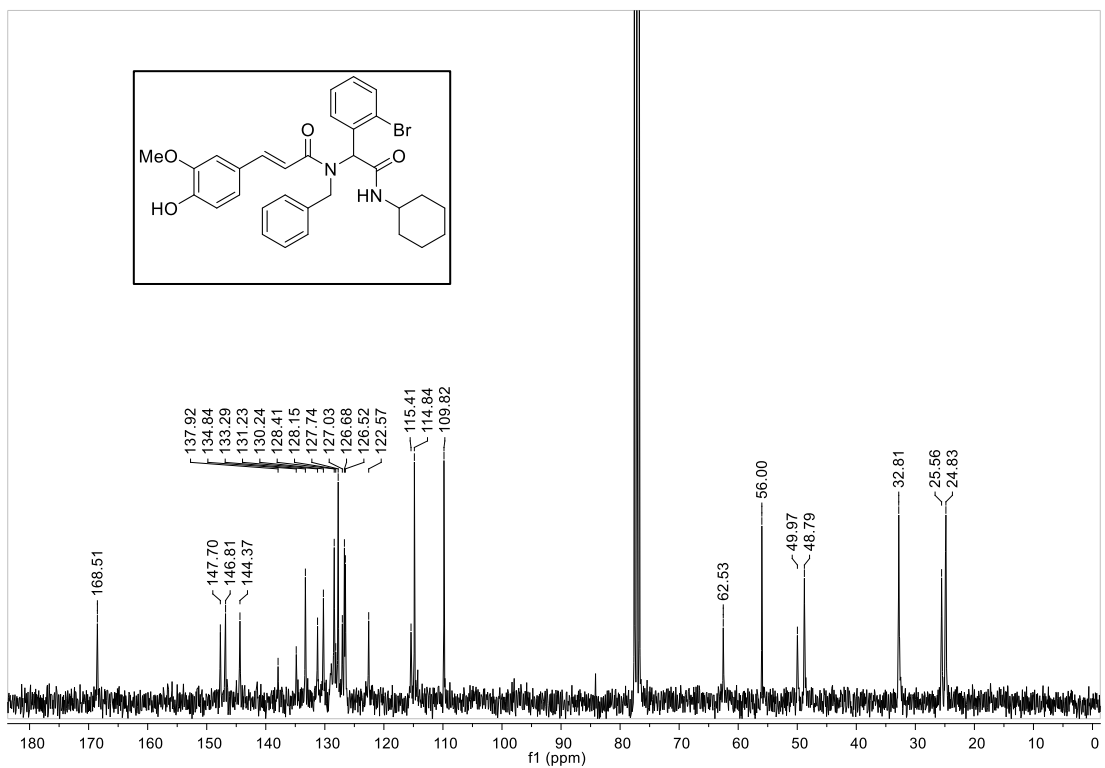

Figure S22. <sup>13</sup>C-NMR of 9k.

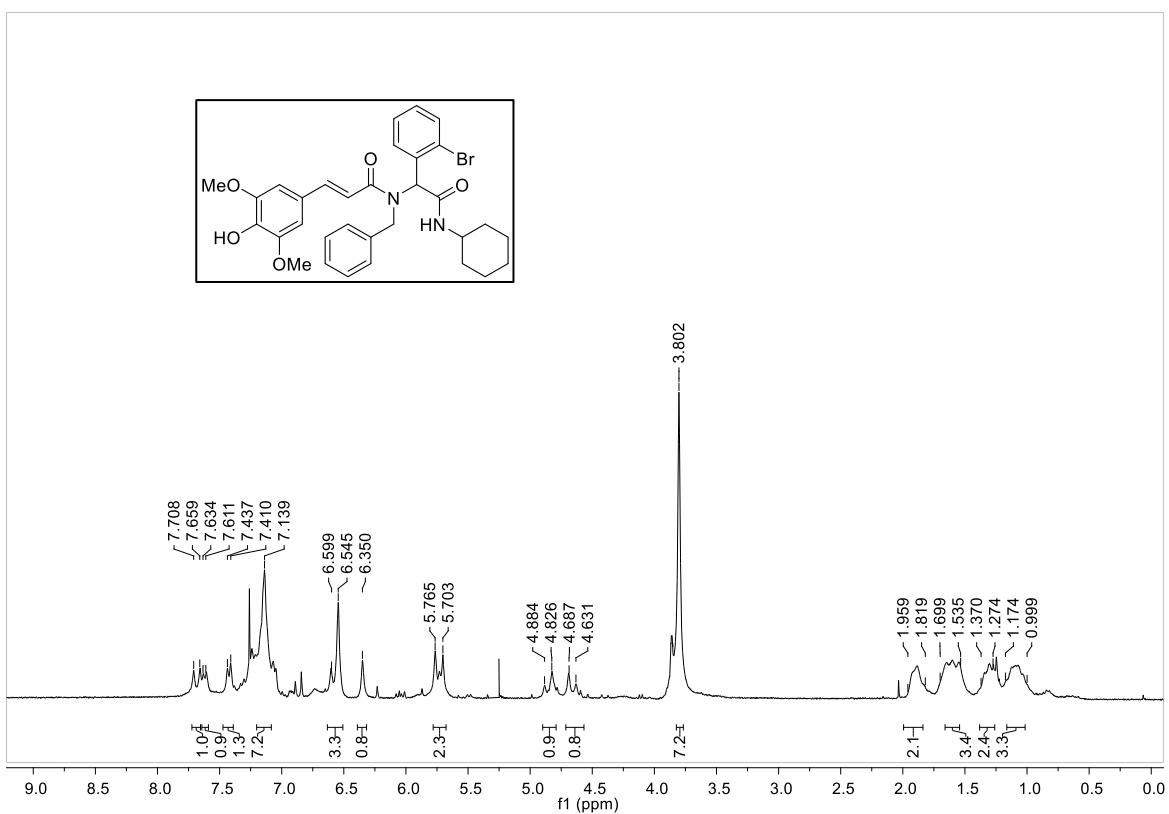

Figure S23. <sup>1</sup>H-NMR of 9l.

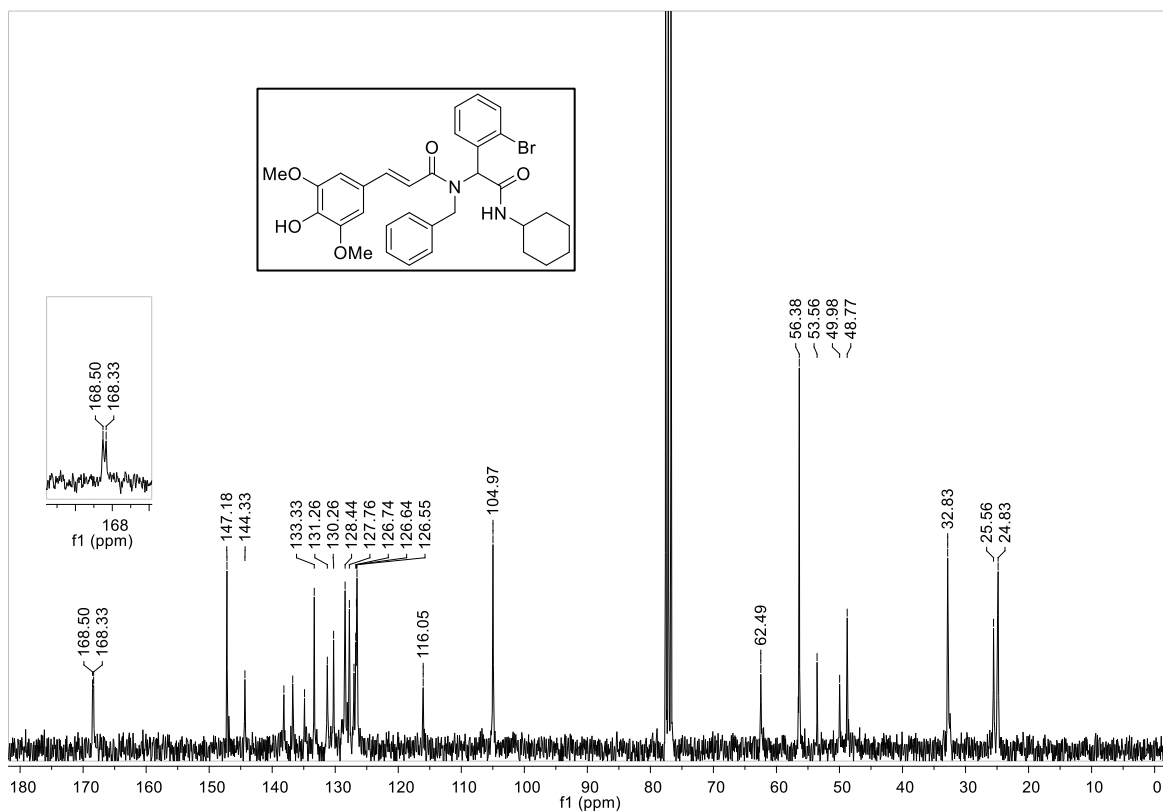

Figure S24. <sup>13</sup>C-NMR of 9l.

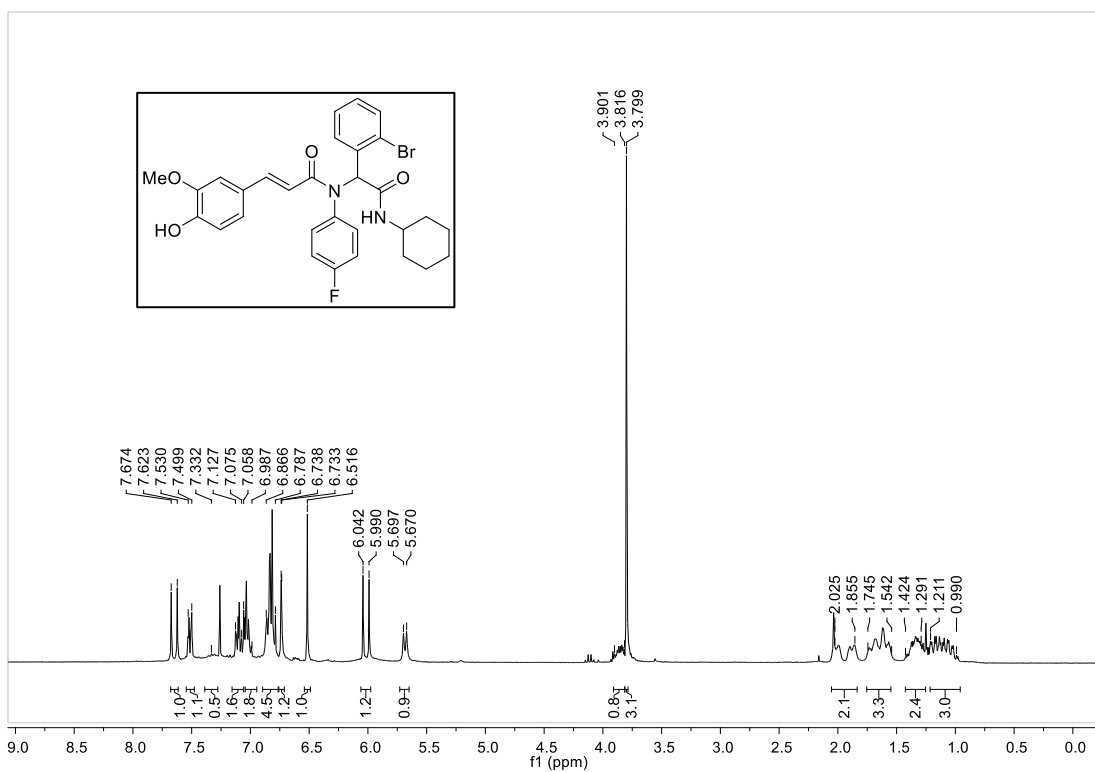

Figure S25. <sup>1</sup>H-NMR of 9m.

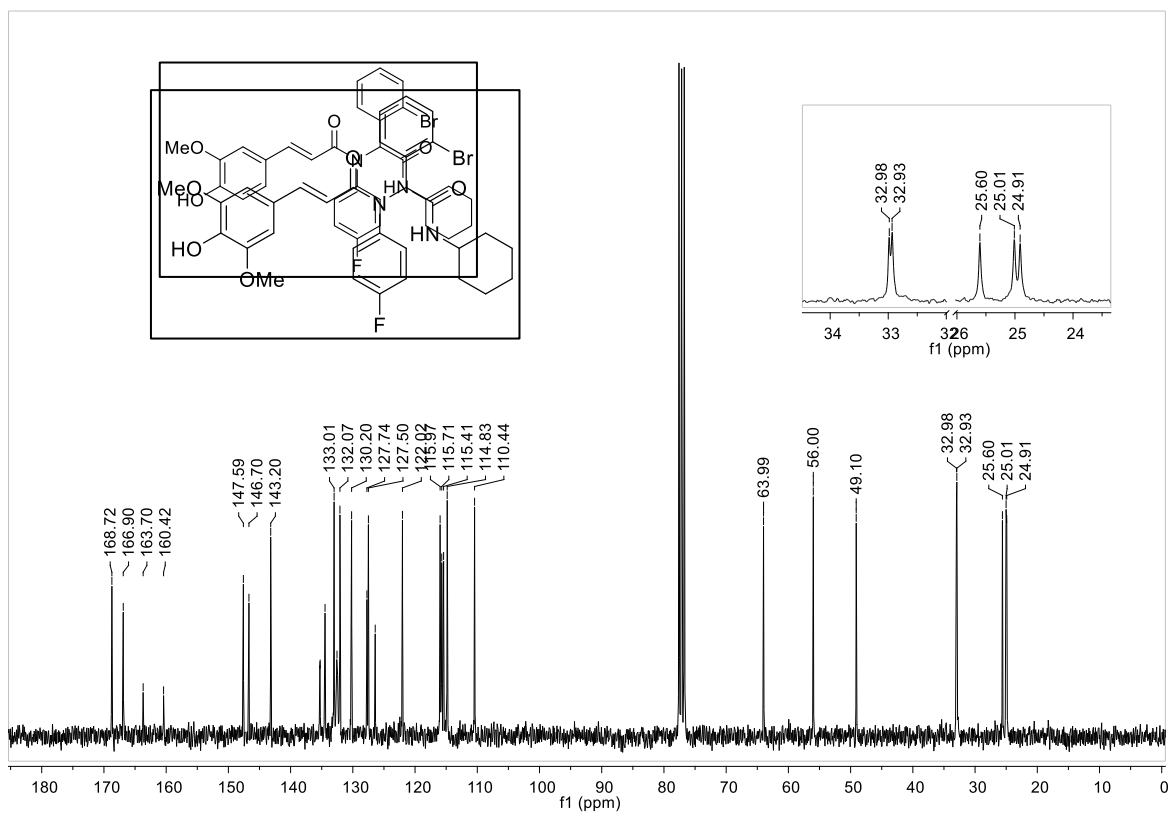

Figure S26. <sup>13</sup>C-NMR of 9m.

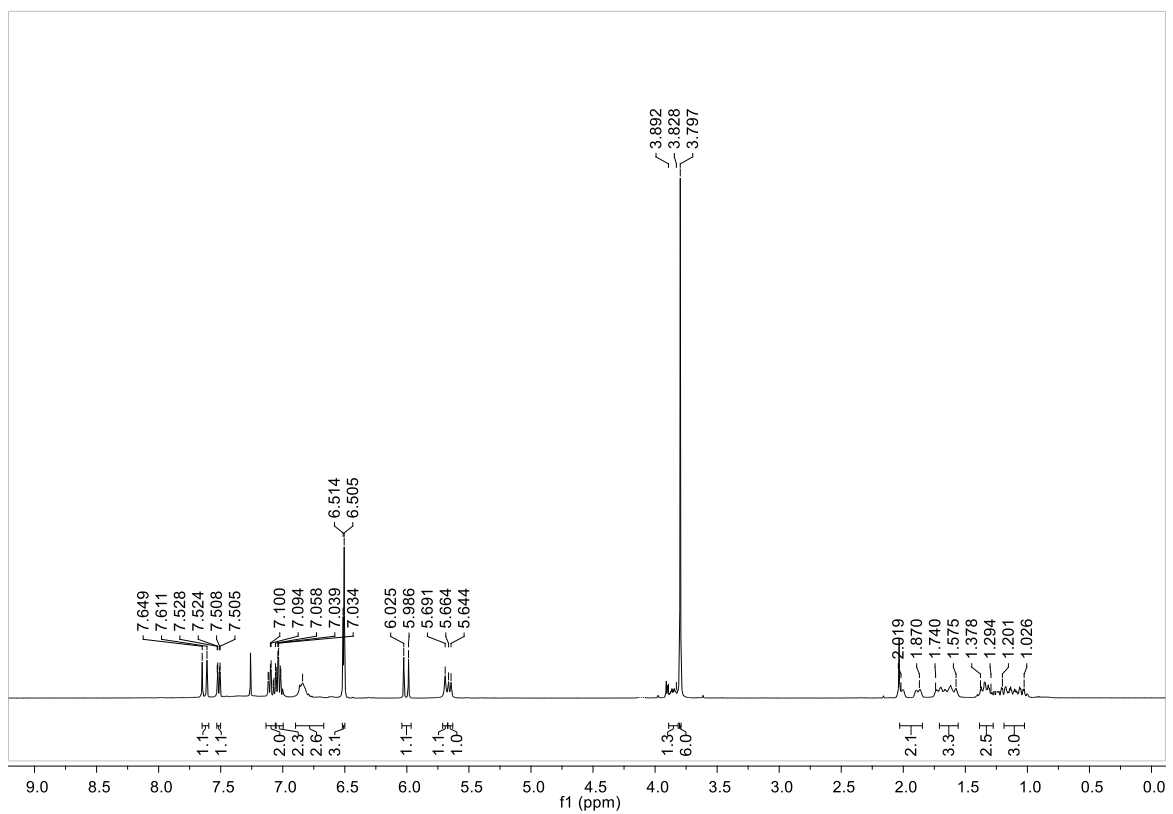



Figure S27. <sup>1</sup>H-NMR of 9n.

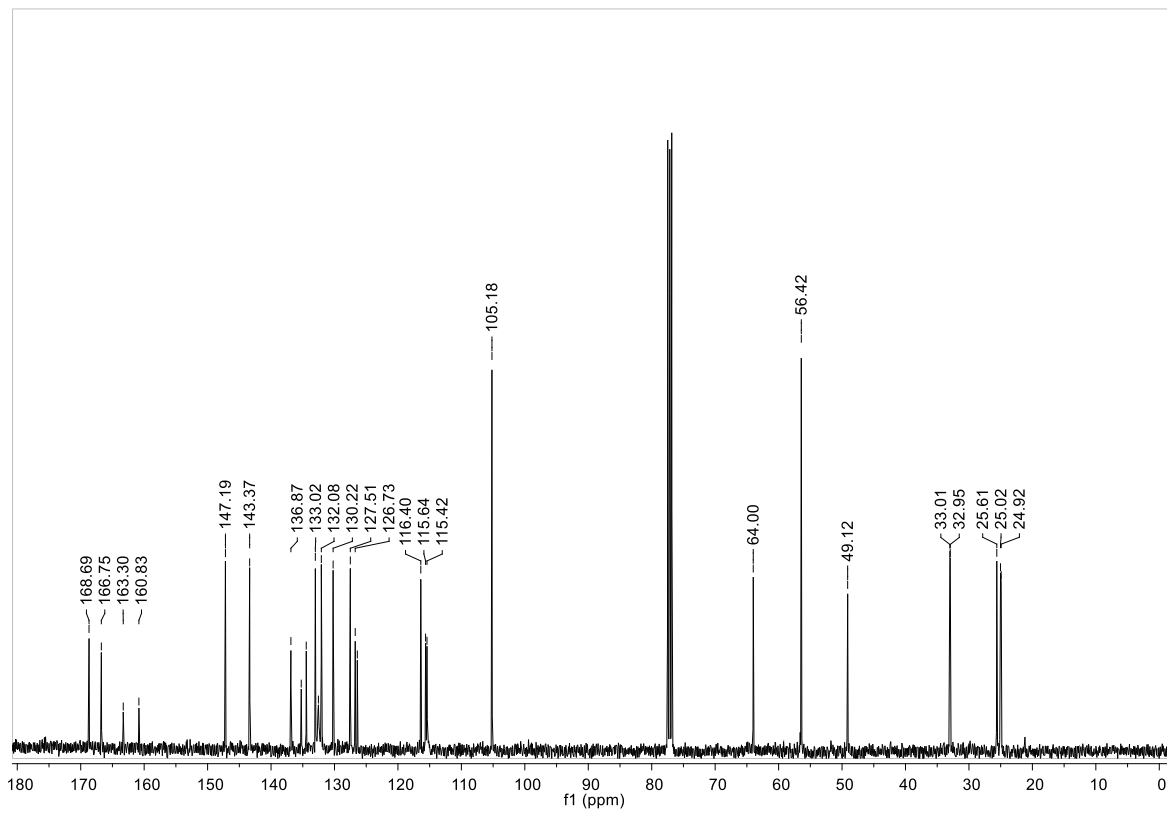

Figure S28. <sup>13</sup>C-NMR of 9n.

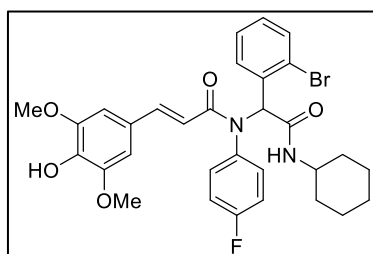

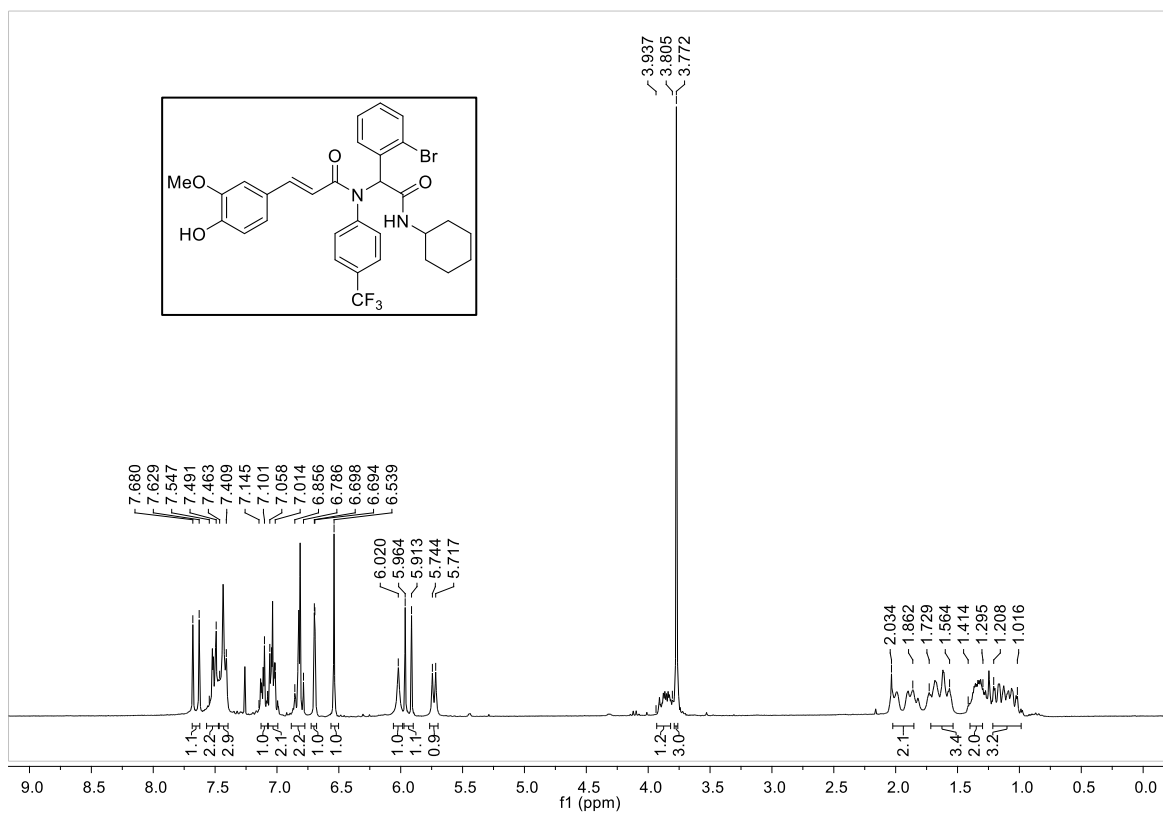

Figure S29. <sup>1</sup>H-NMR of **9o**.

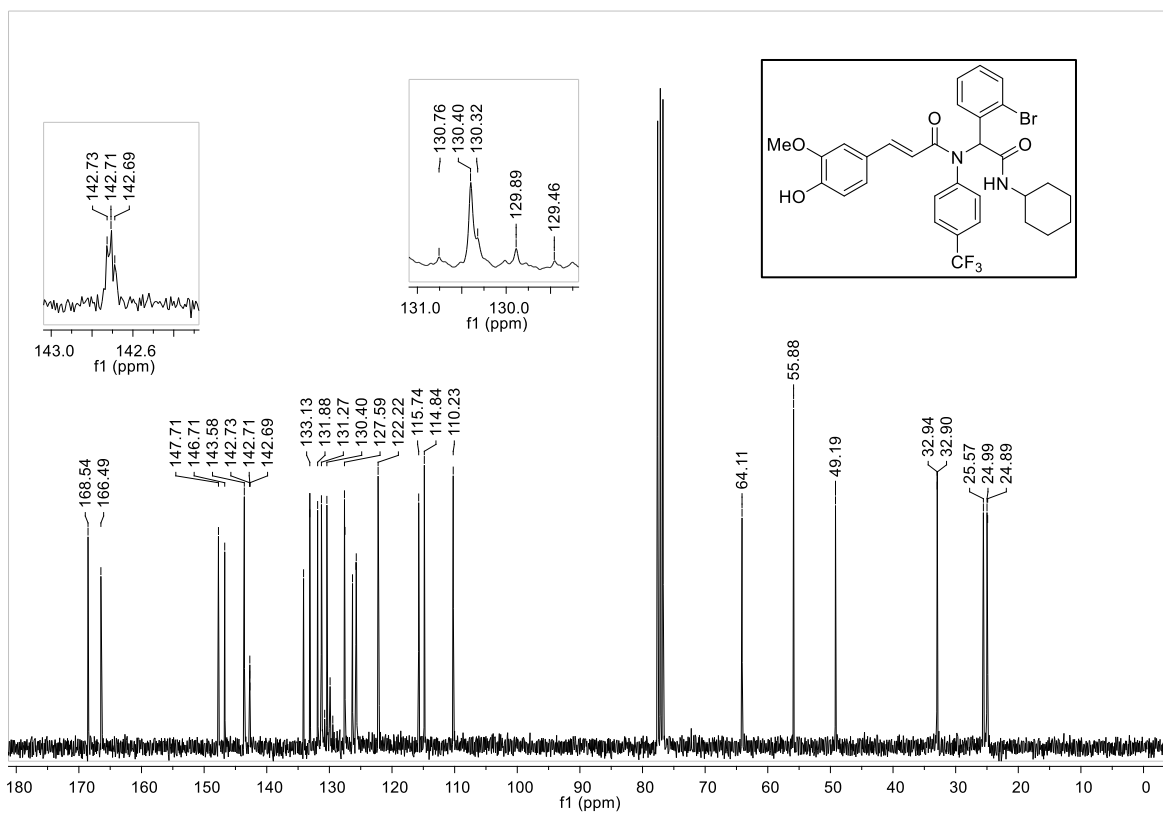

Figure S30. <sup>13</sup>C-NMR of 9o.

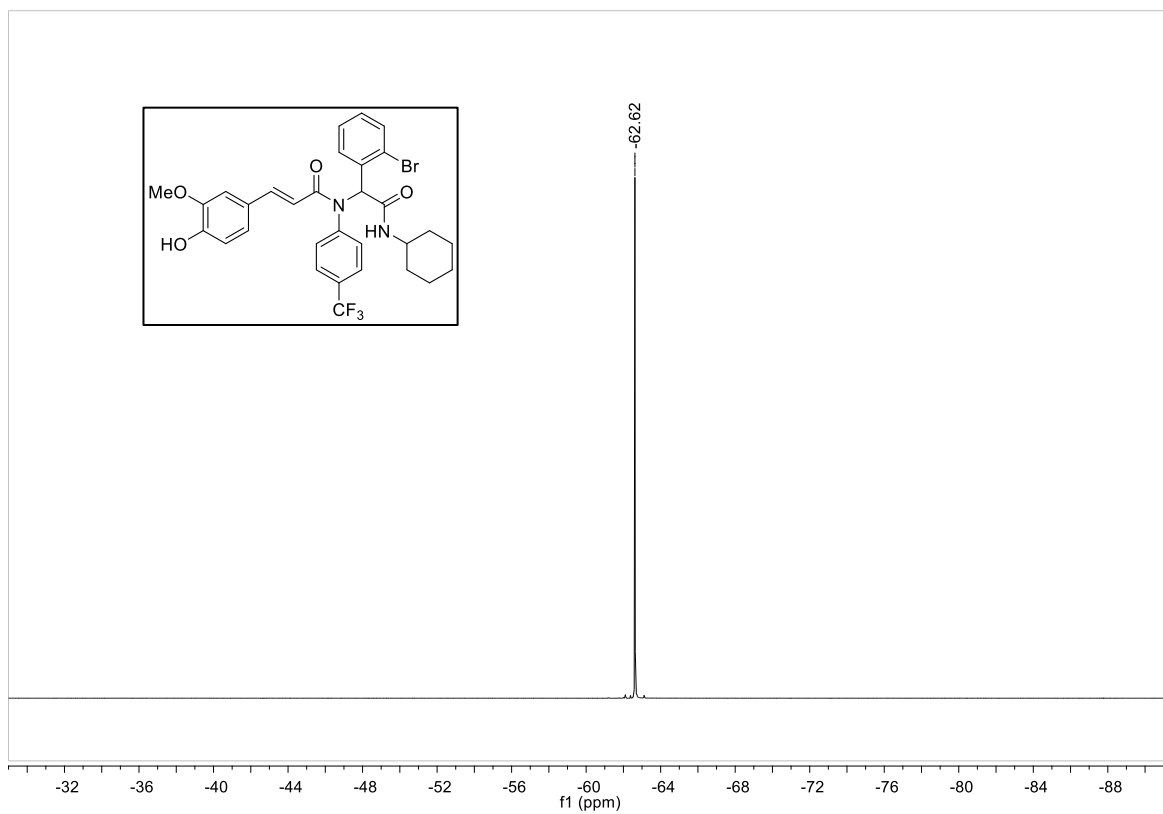

Figure S31.  $^{19}\text{F}$ -NMR of 9o.

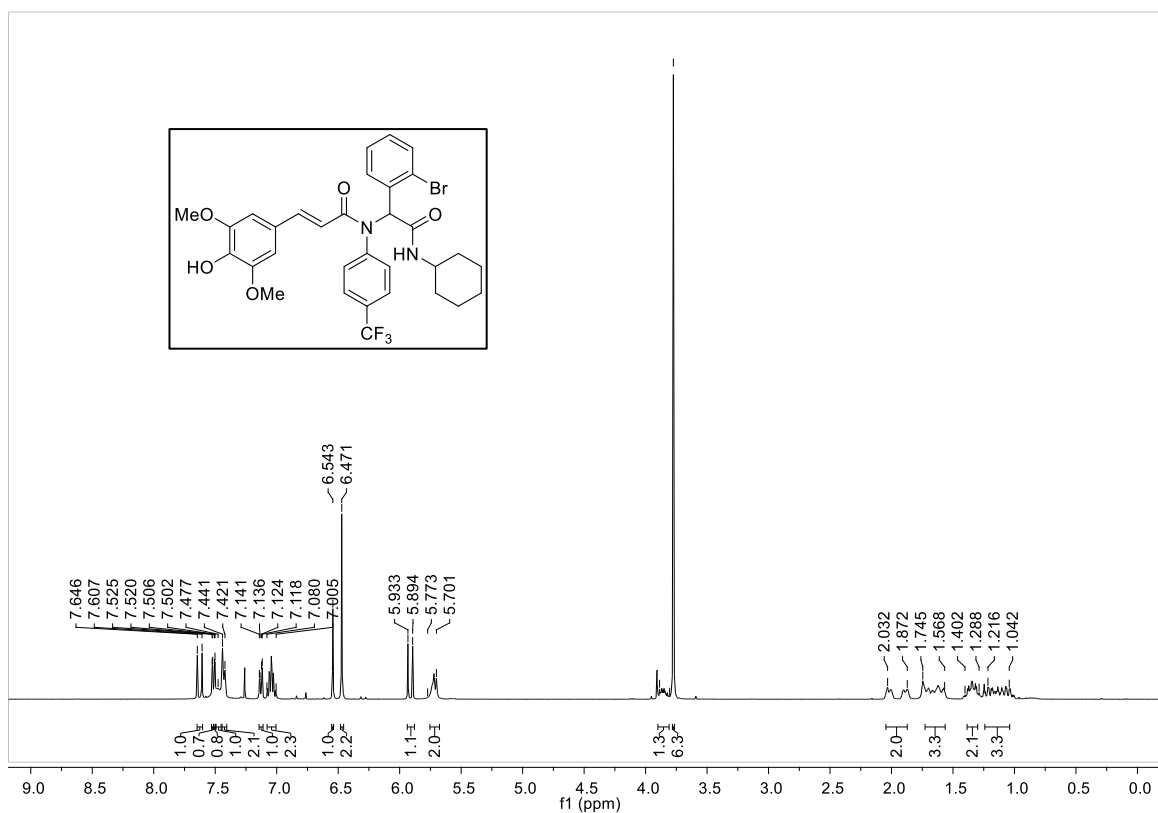

Figure S32. <sup>1</sup>H-NMR of 9p.

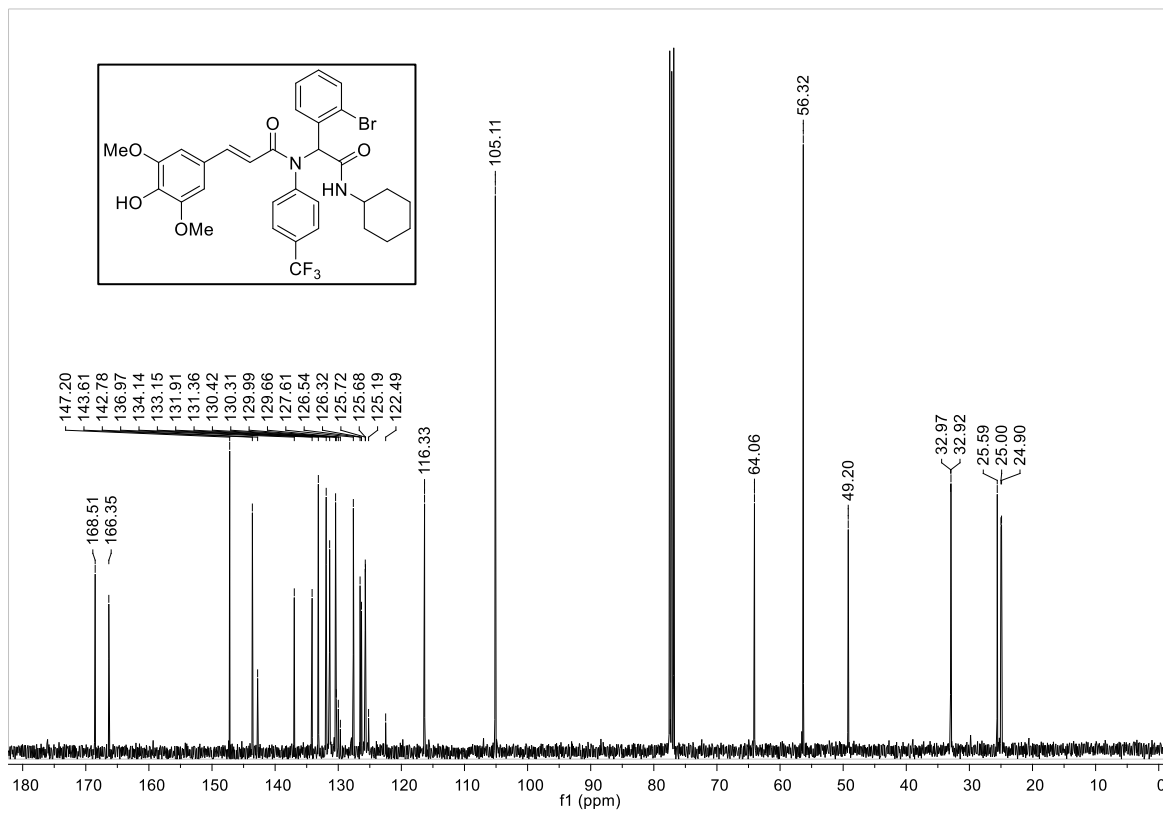

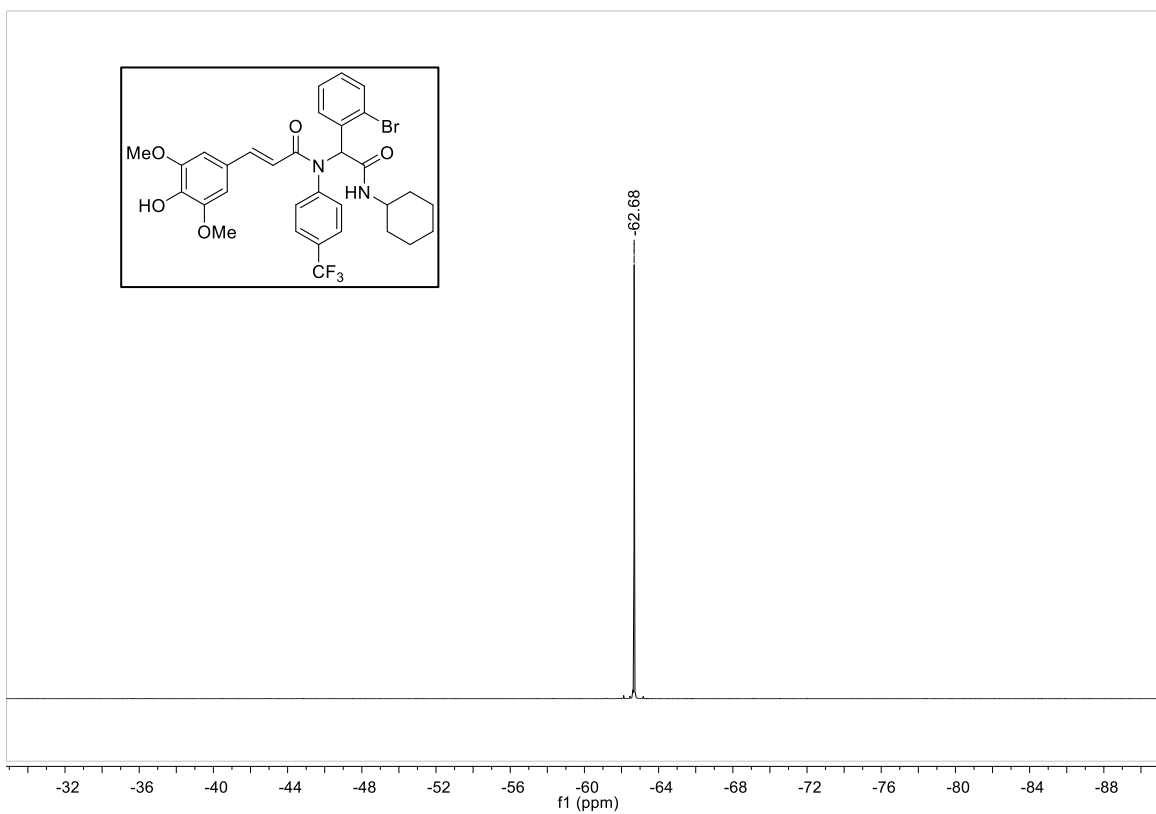

**Figure S34.**  $^{19}\text{F}$ -NMR of **9p**.

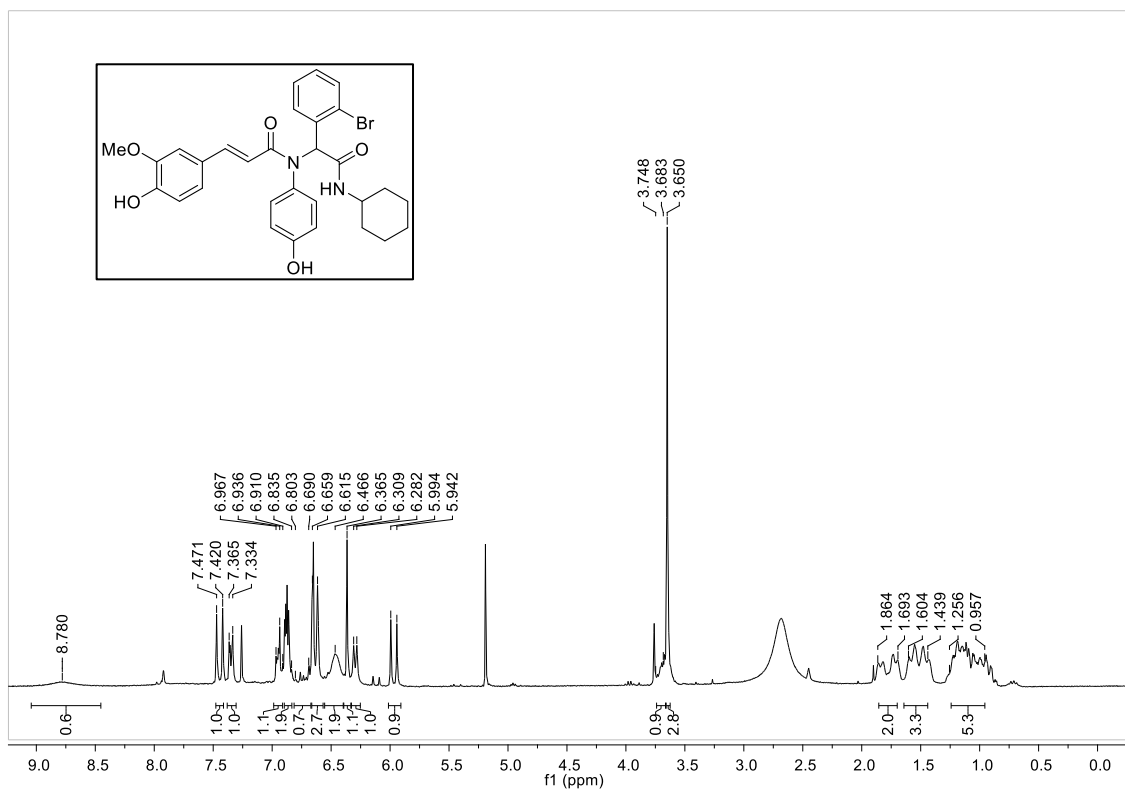

Figure S35. <sup>1</sup>H-NMR of 9q.

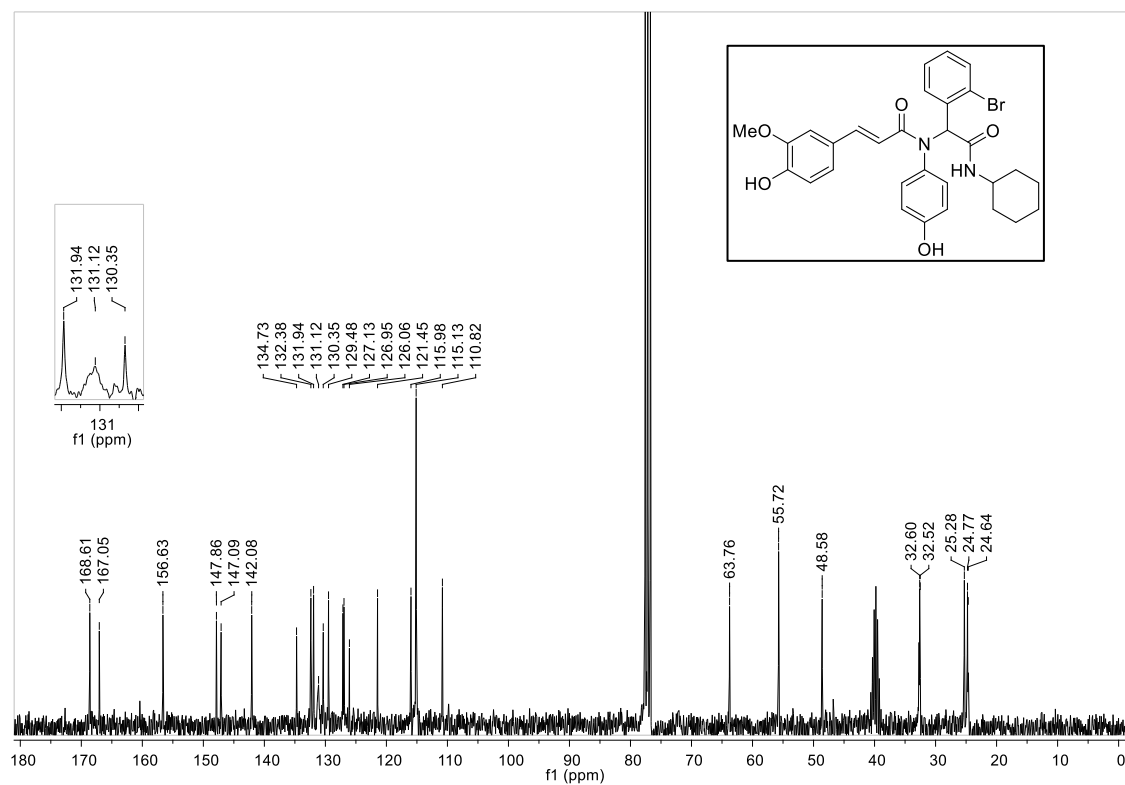

Figure S36. <sup>13</sup>C-NMR of 9q.

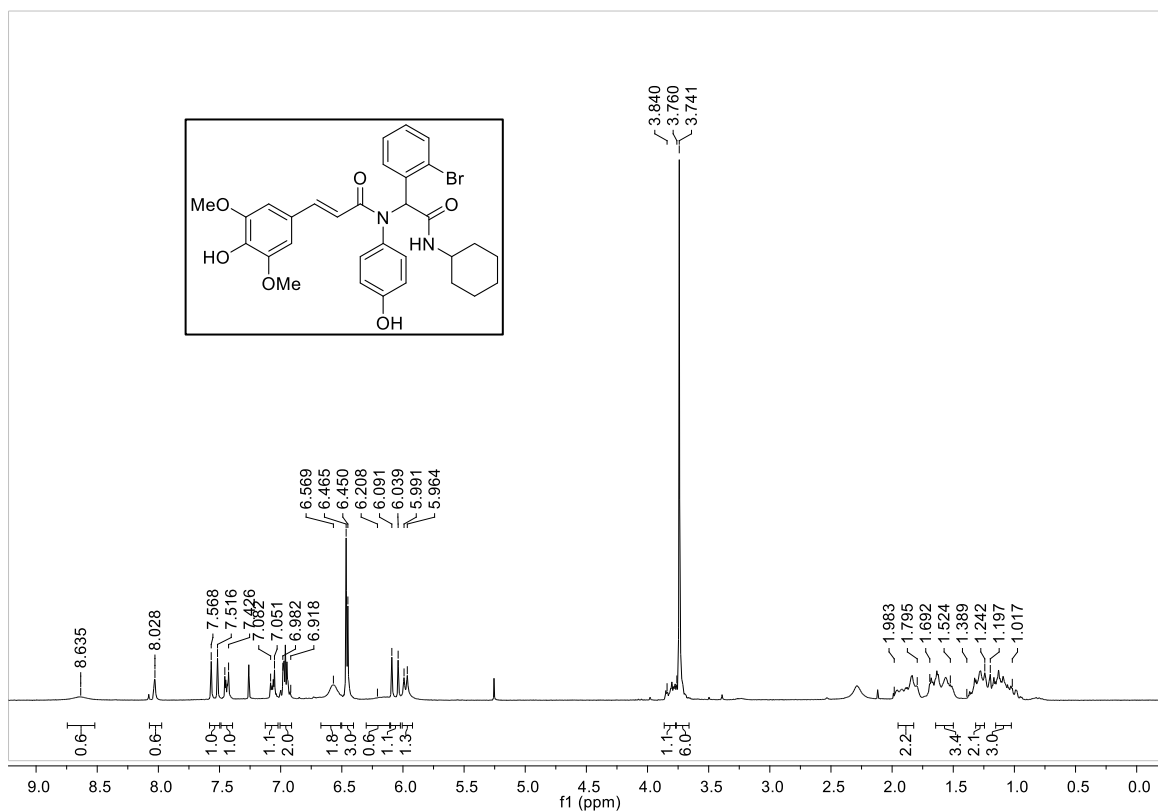

Figure S37. <sup>1</sup>H-NMR of 9r.

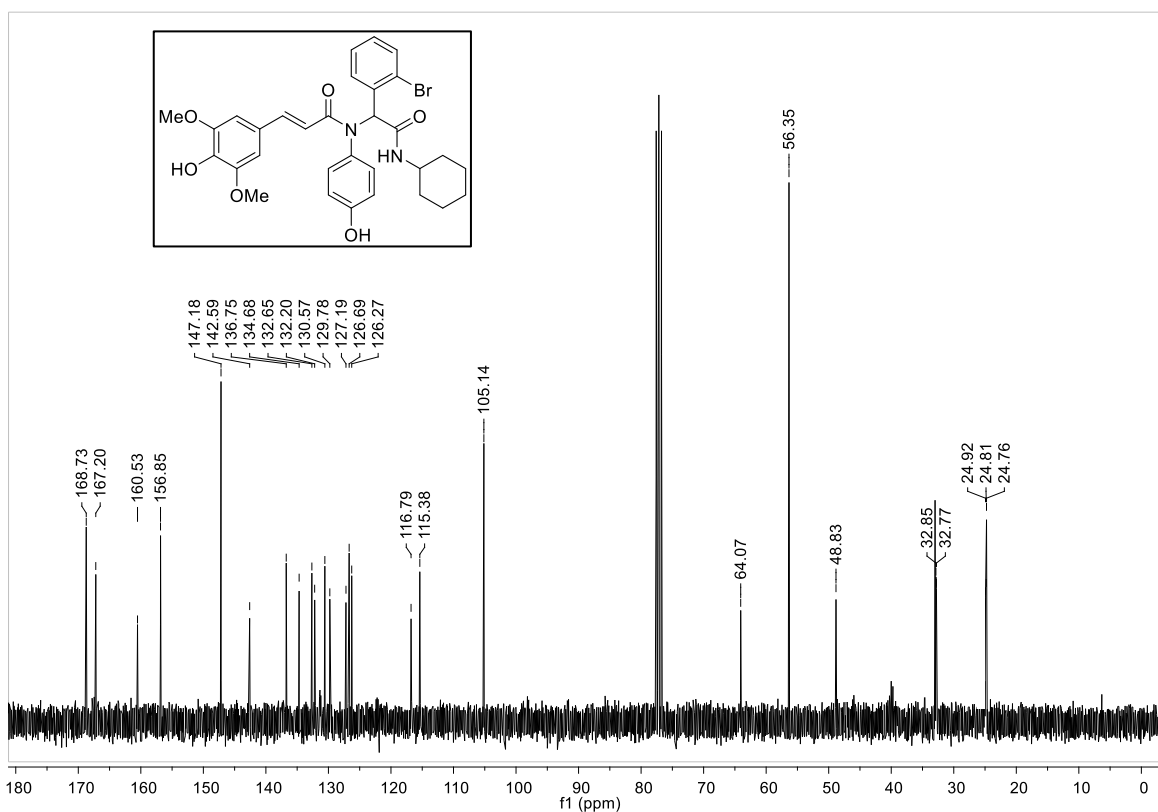

Figure S38. <sup>13</sup>C-NMR of 9r.



$^1\text{H}$ -NMR and  $^{13}\text{C}$ -NMR spectra of isoquinolinones  
**10a–r.**

---

---

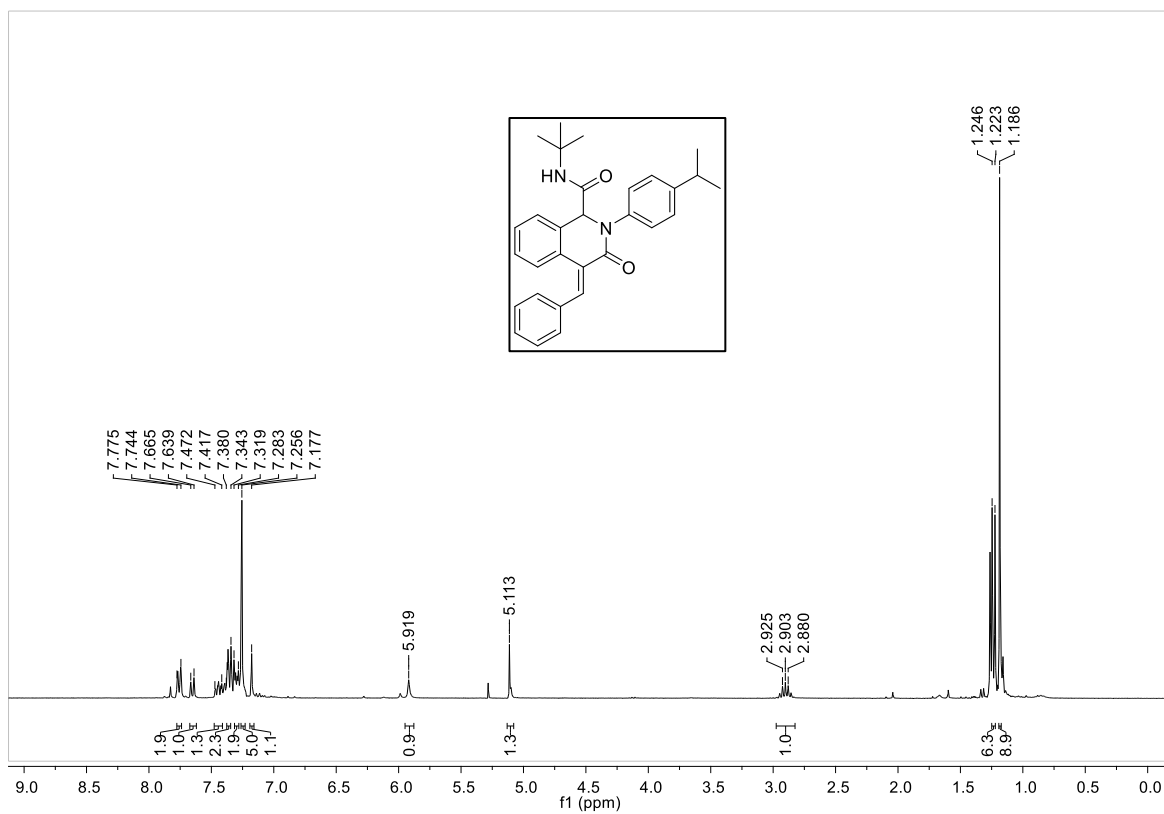

Figure S39.  $^1\text{H-NMR}$  of 10a.

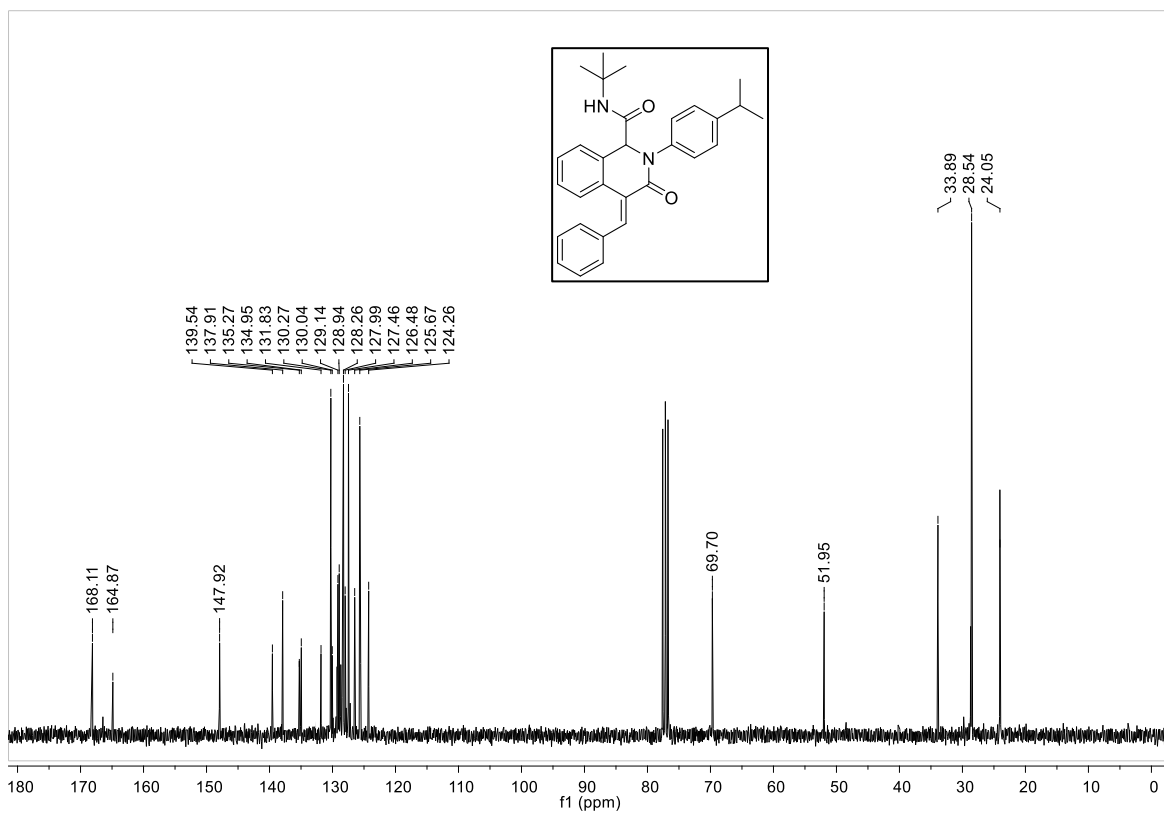

Figure S40.  $^{13}\text{C}$ -NMR of 10a.

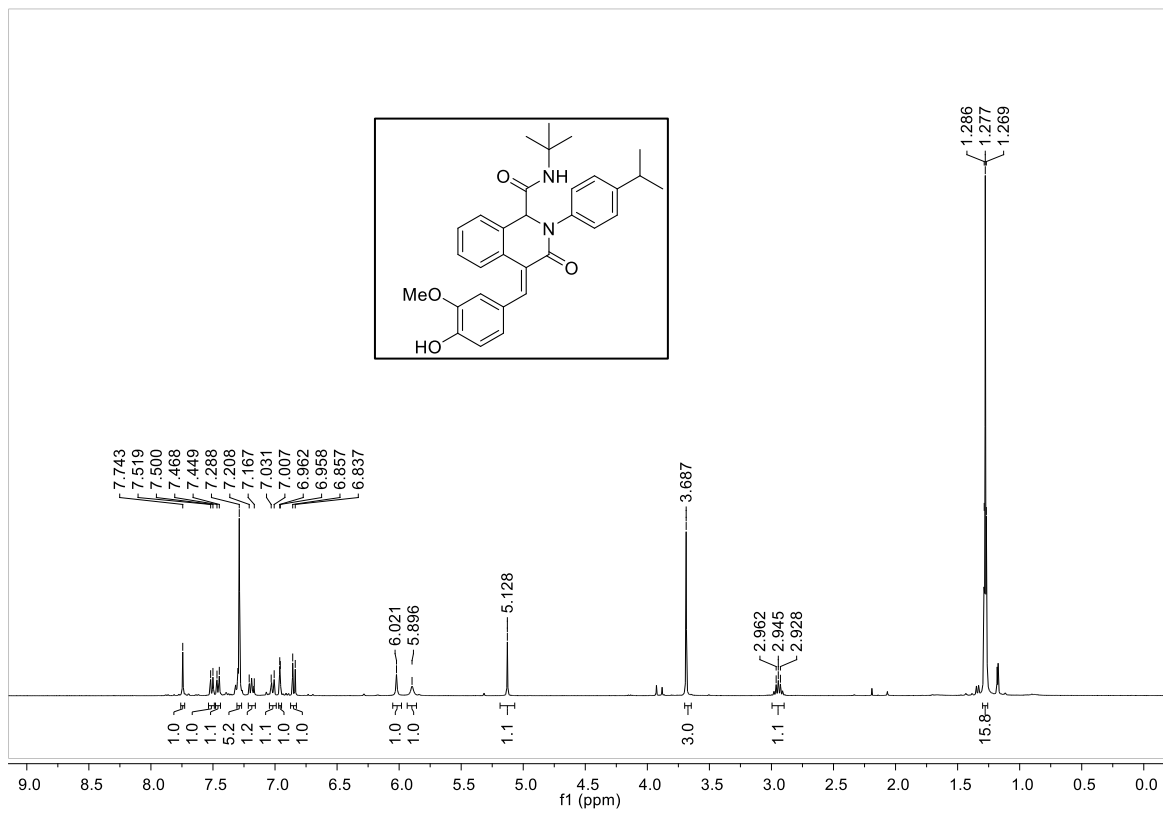

Figure S41.  $^1\text{H}$ -NMR of 10b.

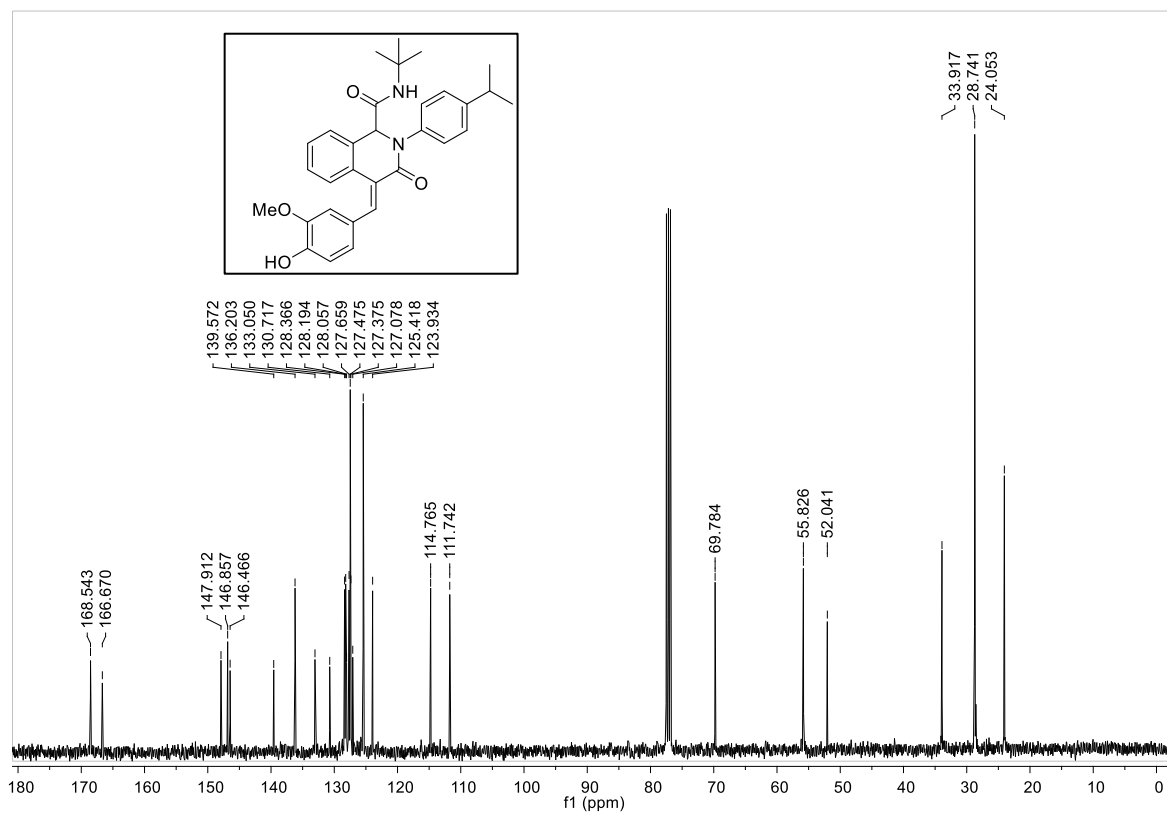

Figure S42. <sup>13</sup>C-NMR of 10b.

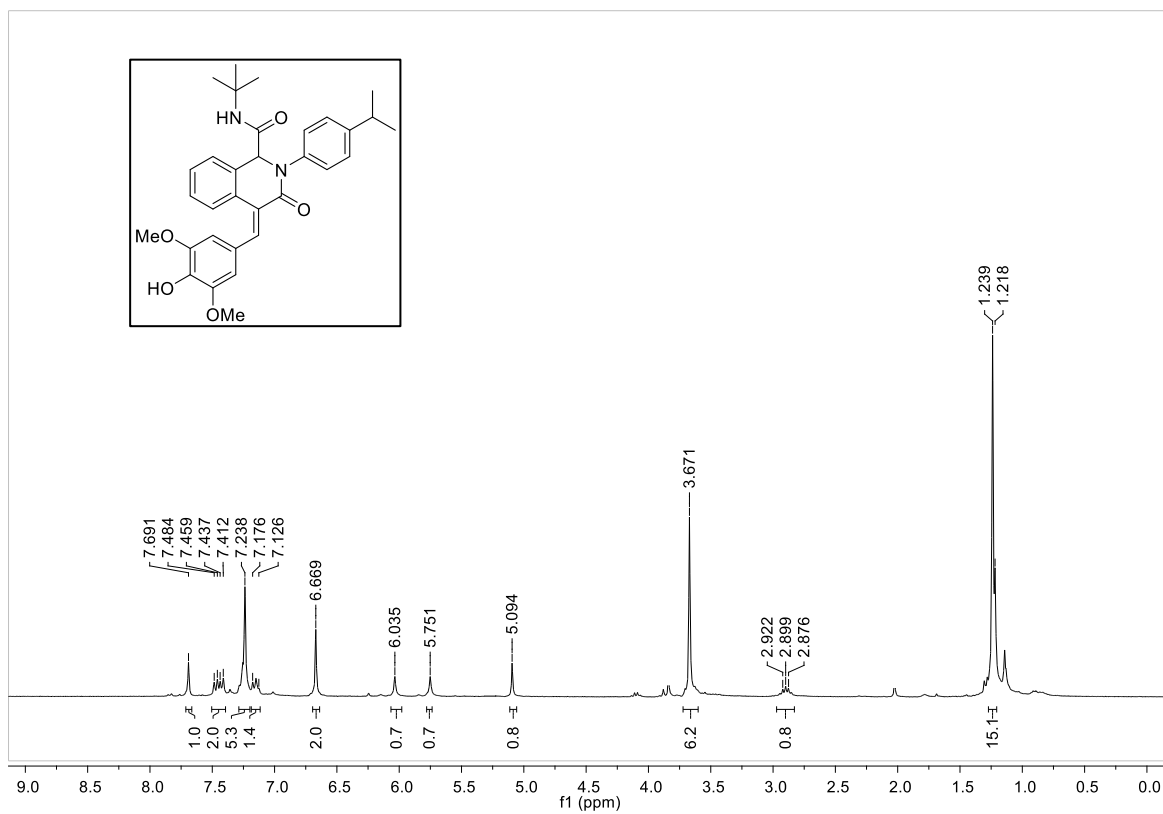

Figure S43. <sup>1</sup>H-NMR of 10c.

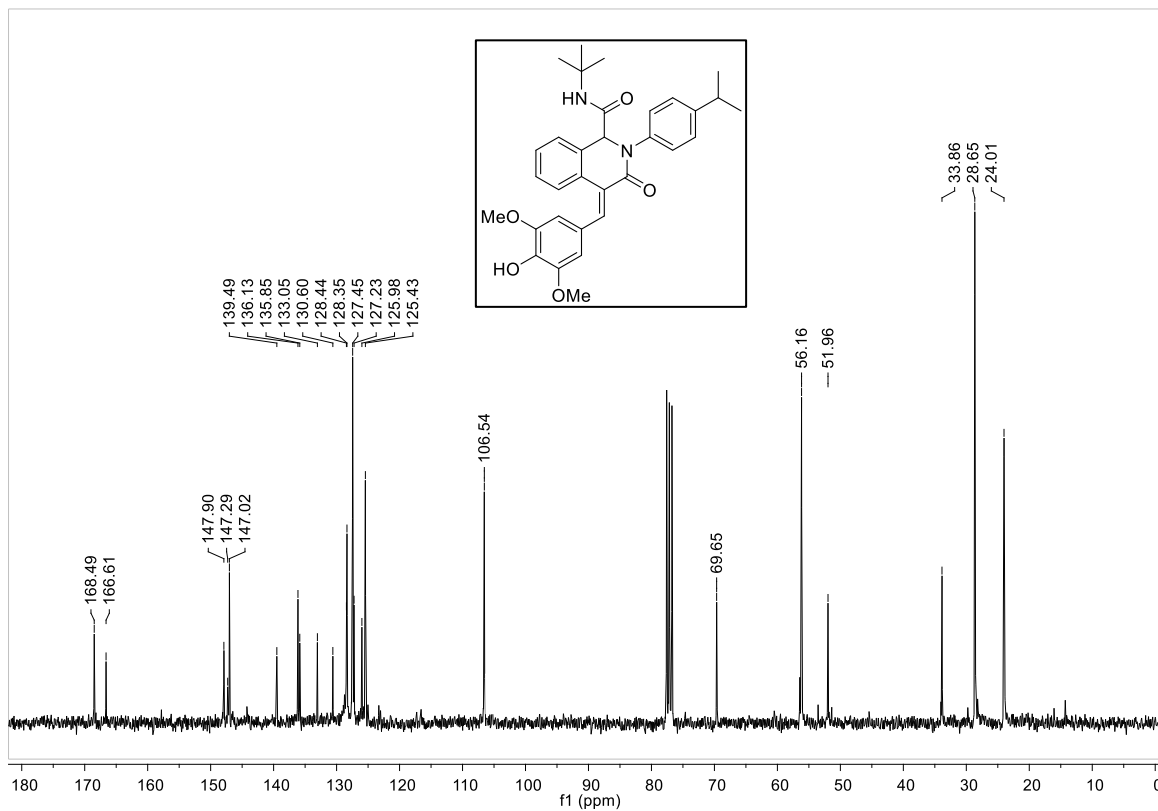

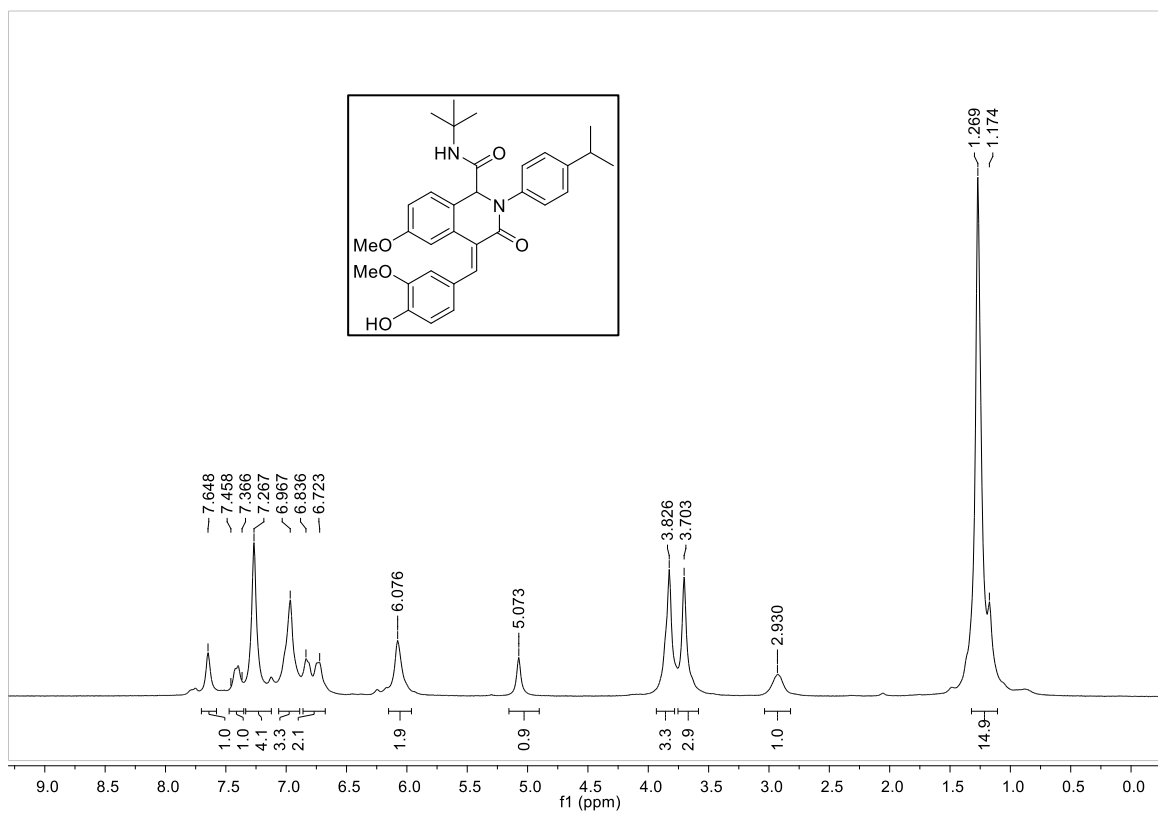

Figure S45. <sup>1</sup>H-NMR of 10d.

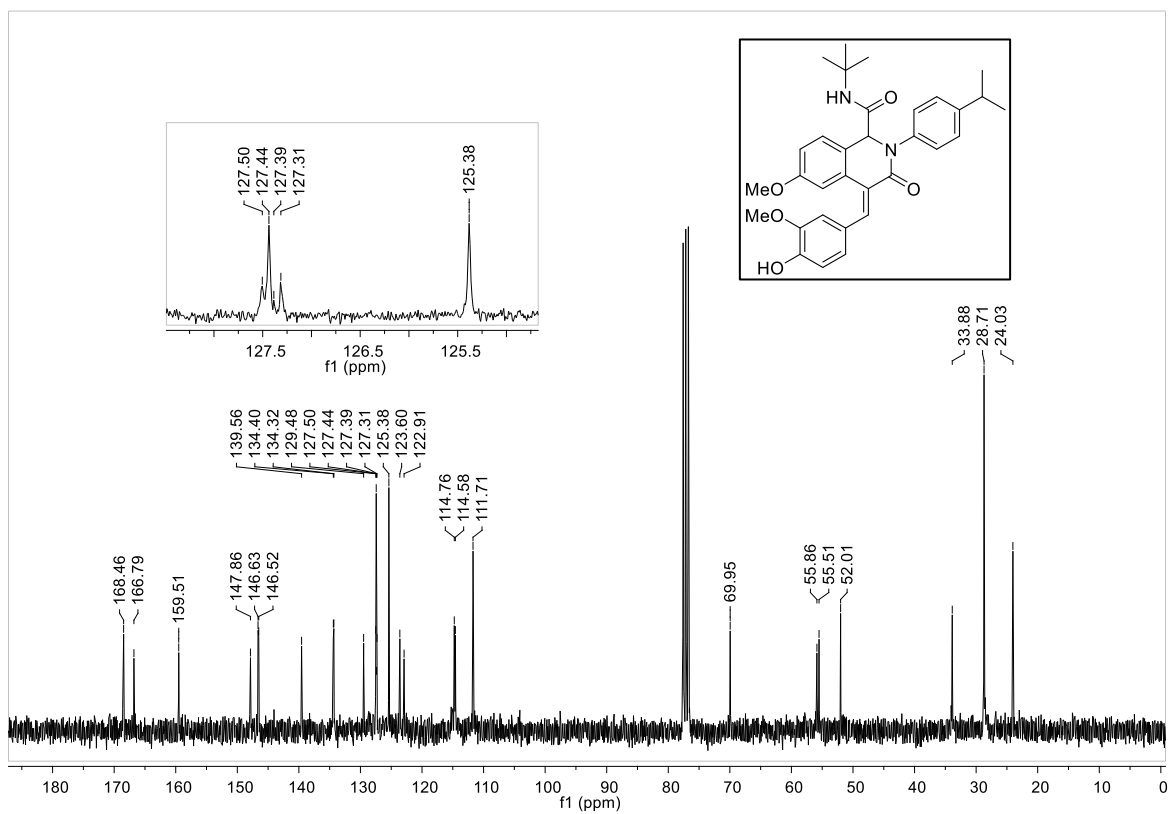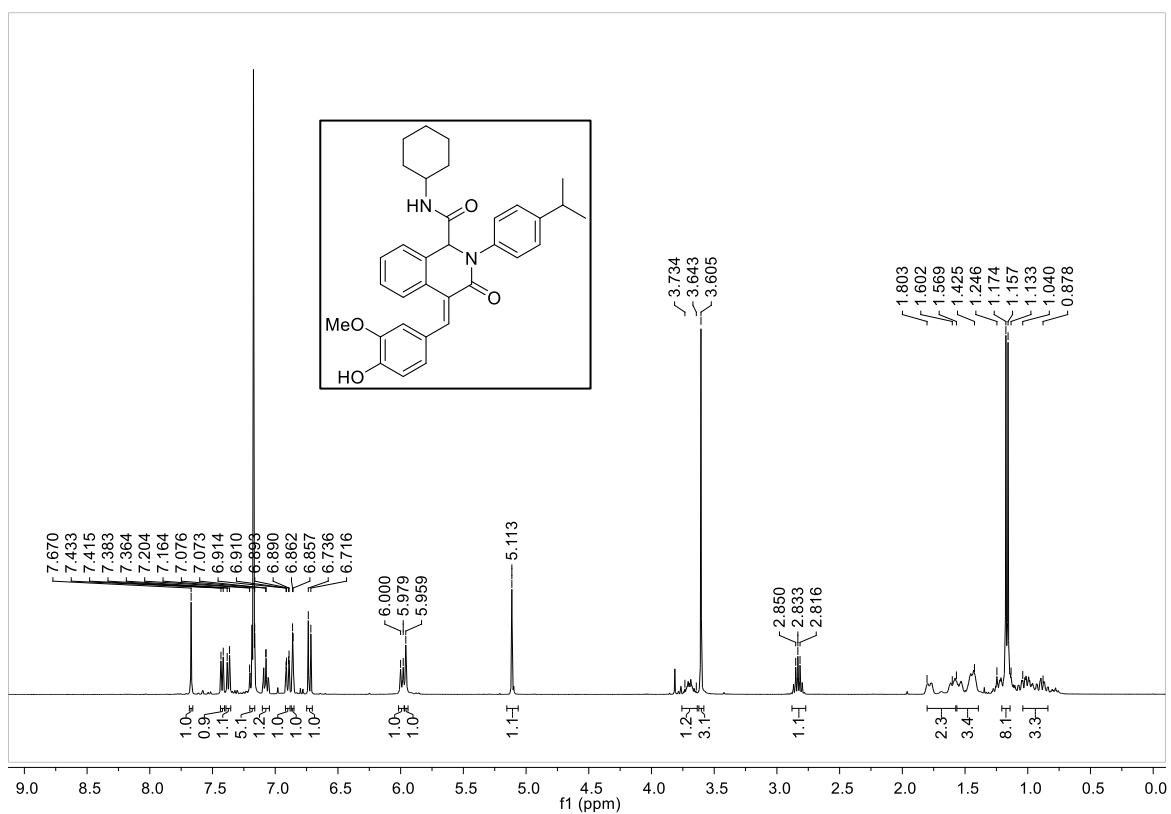





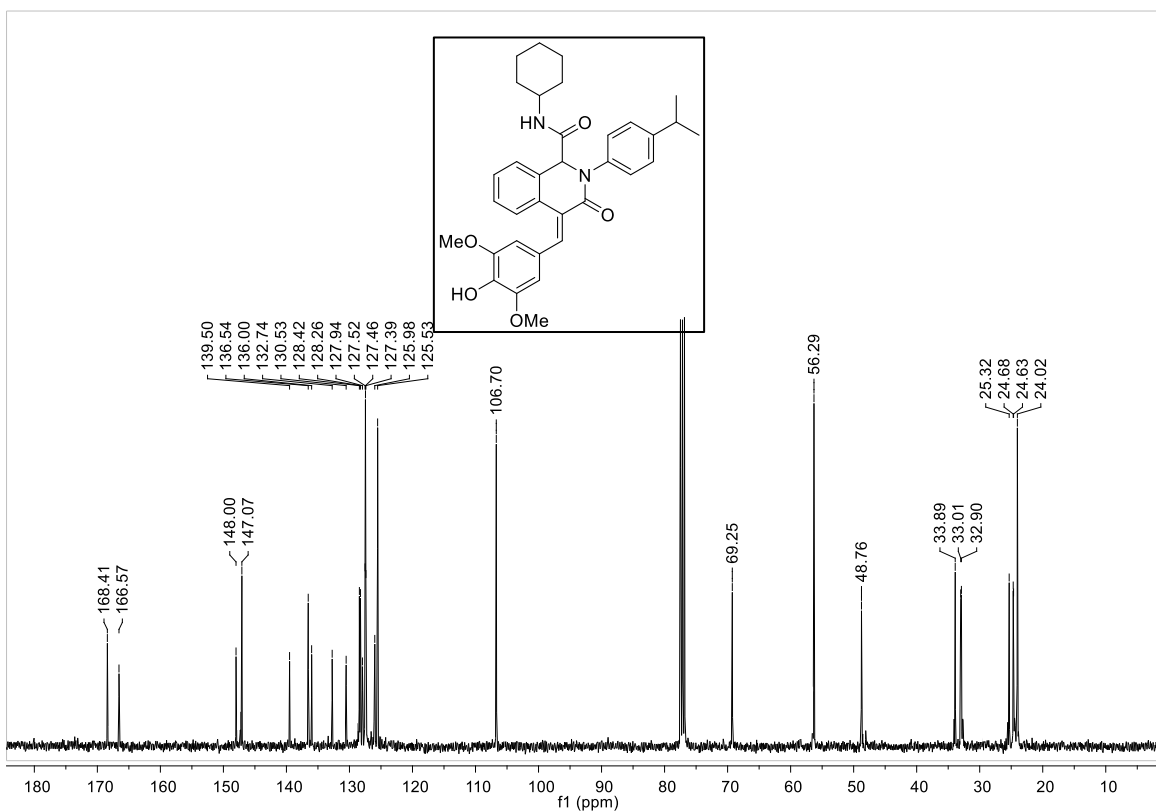

Figure S50. <sup>13</sup>C-NMR of 10f.

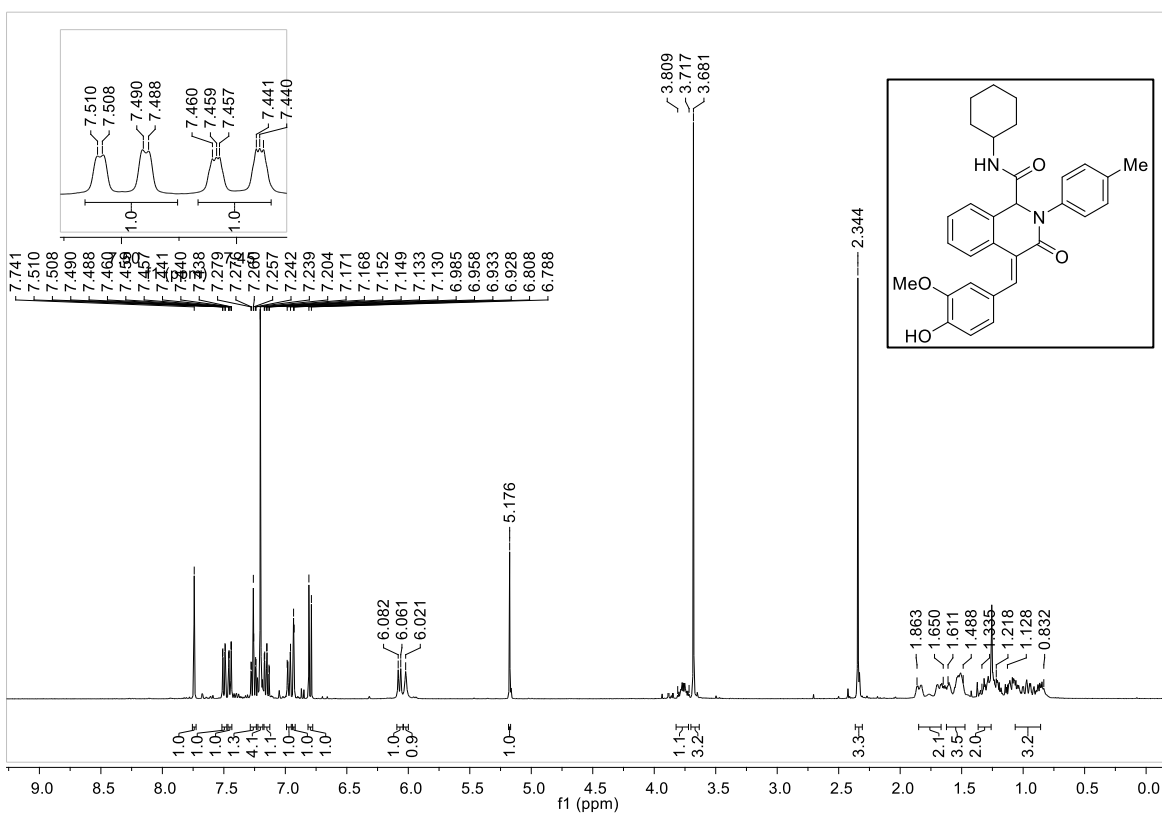

Figure S51. <sup>1</sup>H-NMR of 10g.

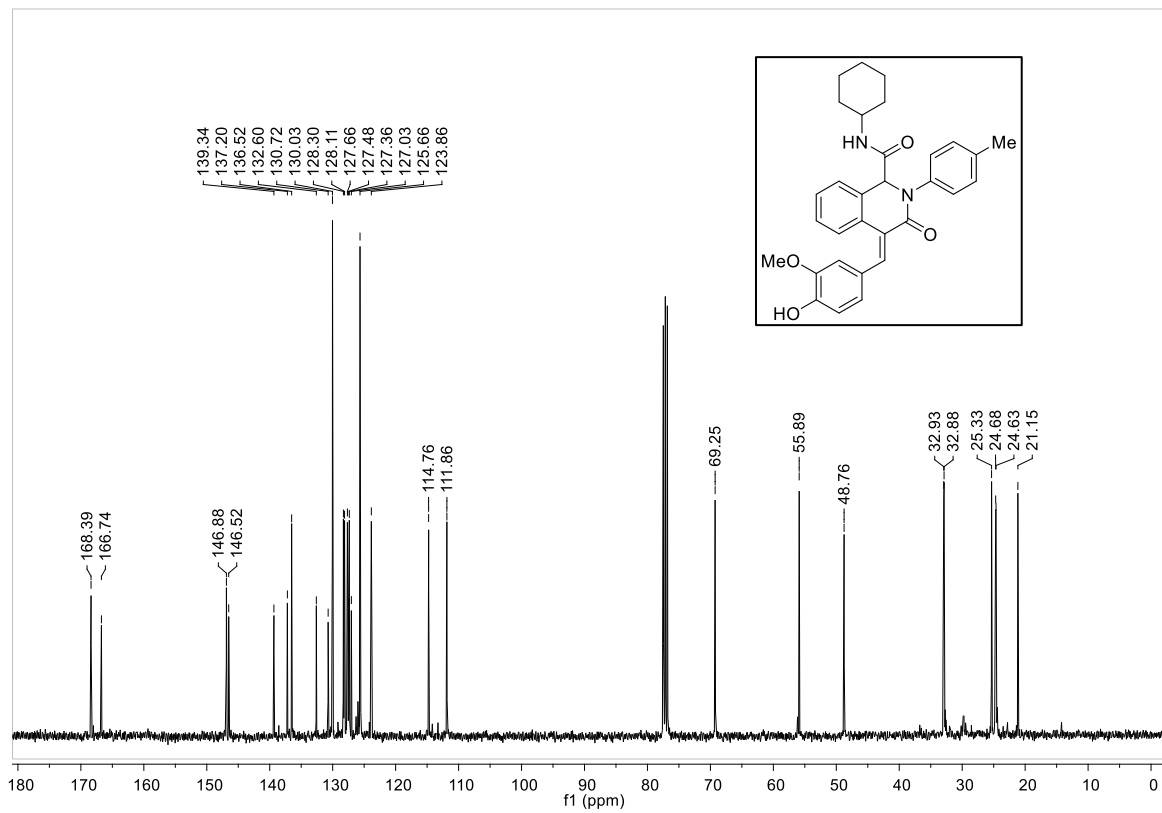

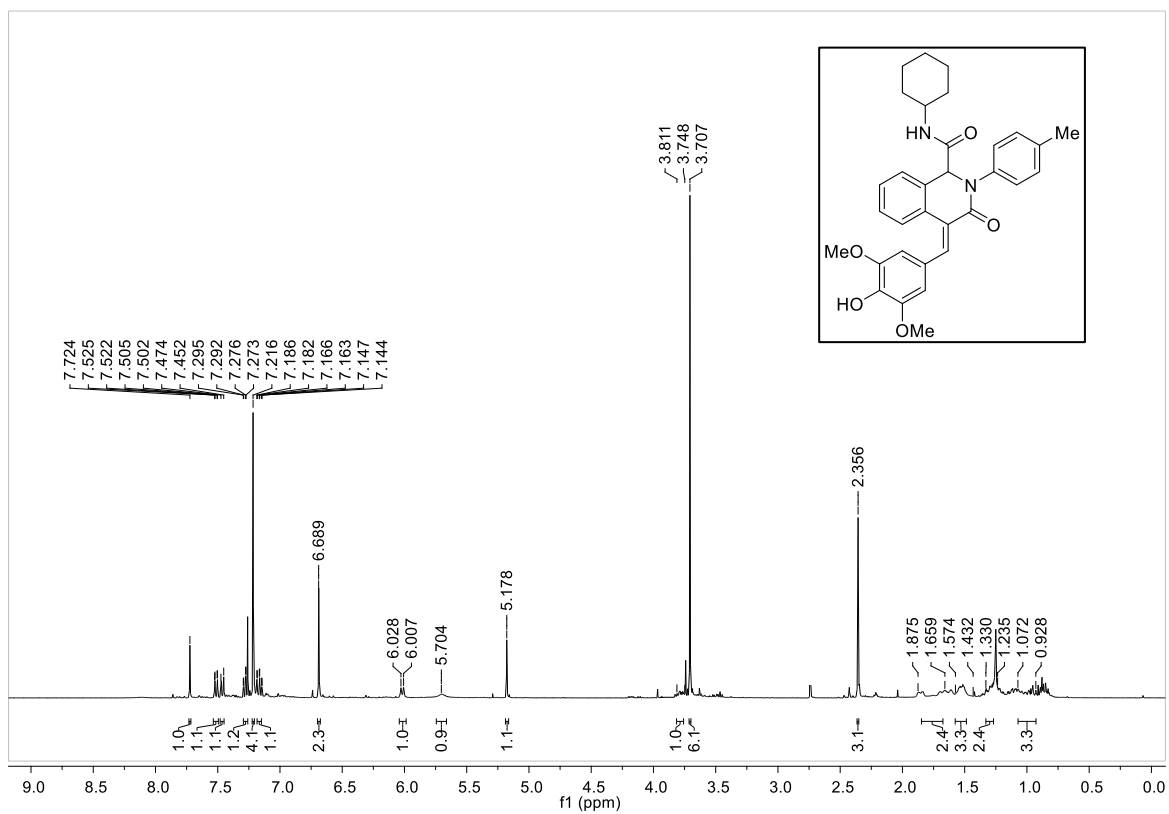

Figure S53. <sup>1</sup>H-NMR of 10h.

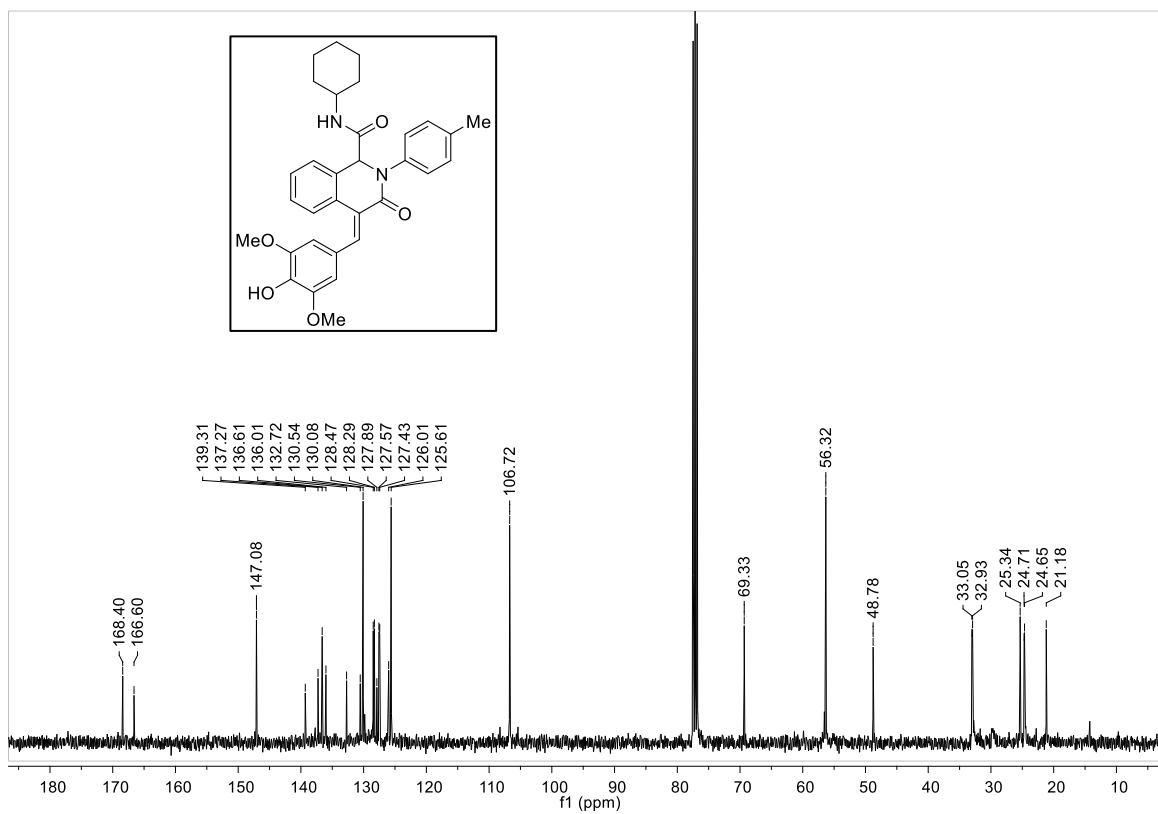

Figure S54. <sup>13</sup>C-NMR of 10h.

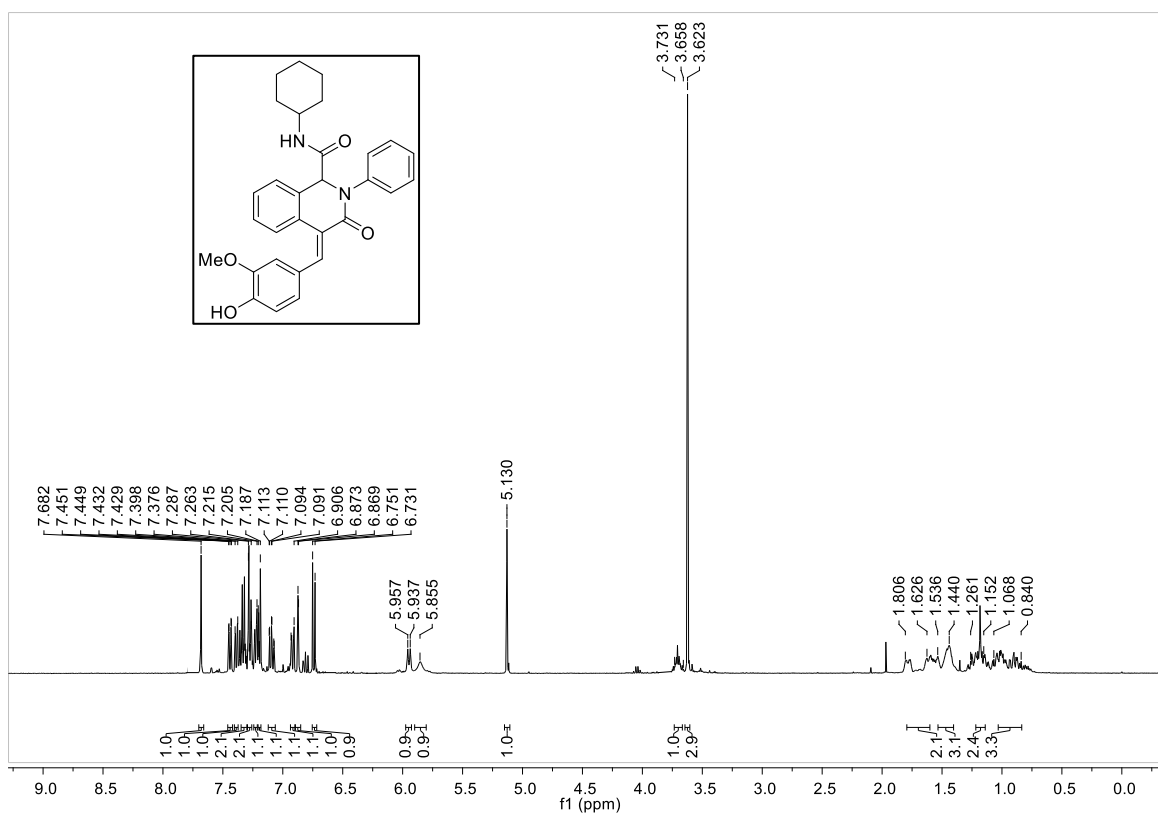

Figure S55. <sup>1</sup>H-NMR of 10i.

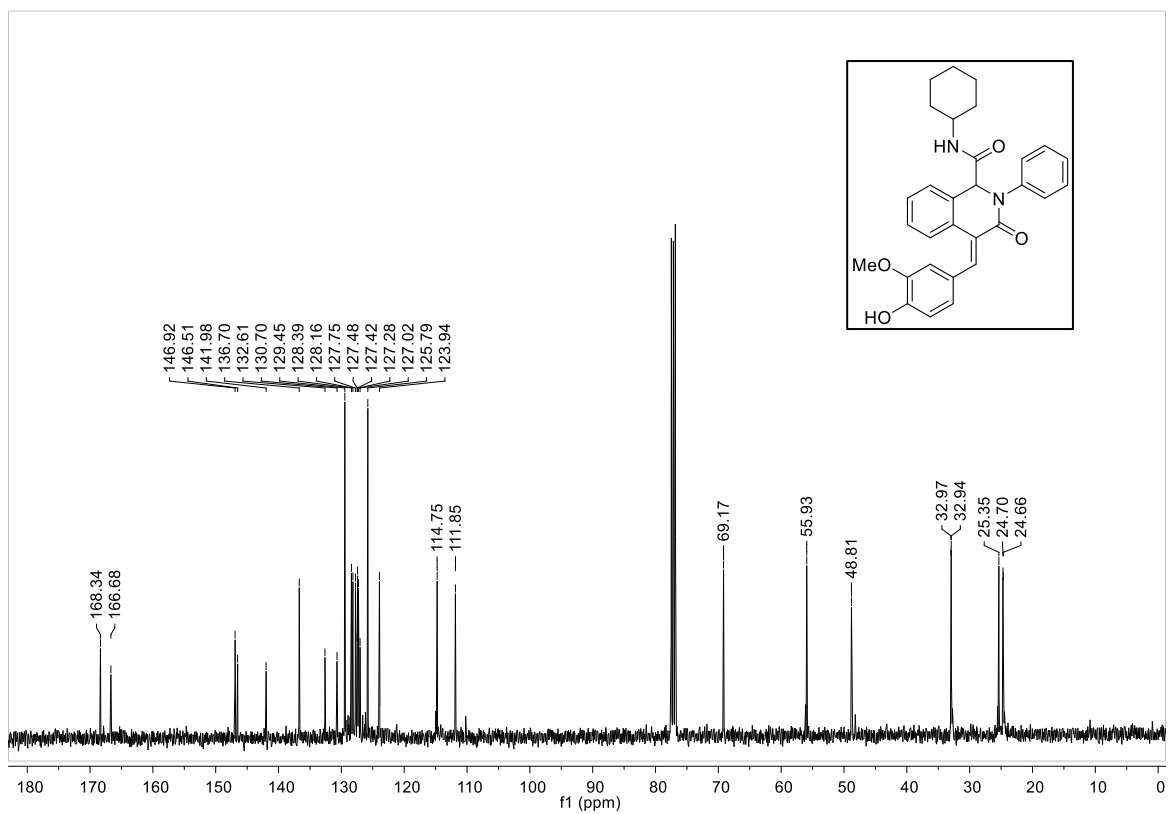

Figure S56. <sup>13</sup>C-NMR of 10i.

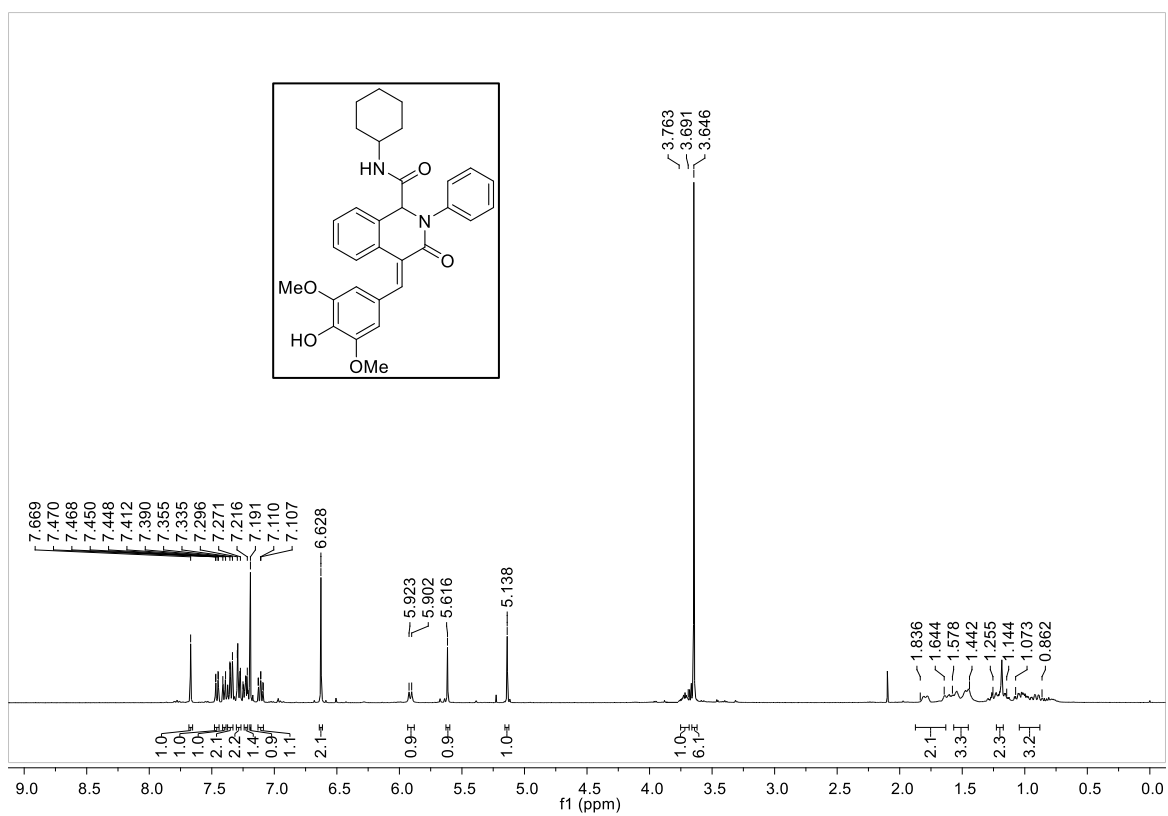

Figure S57. <sup>1</sup>H-NMR of 10j.

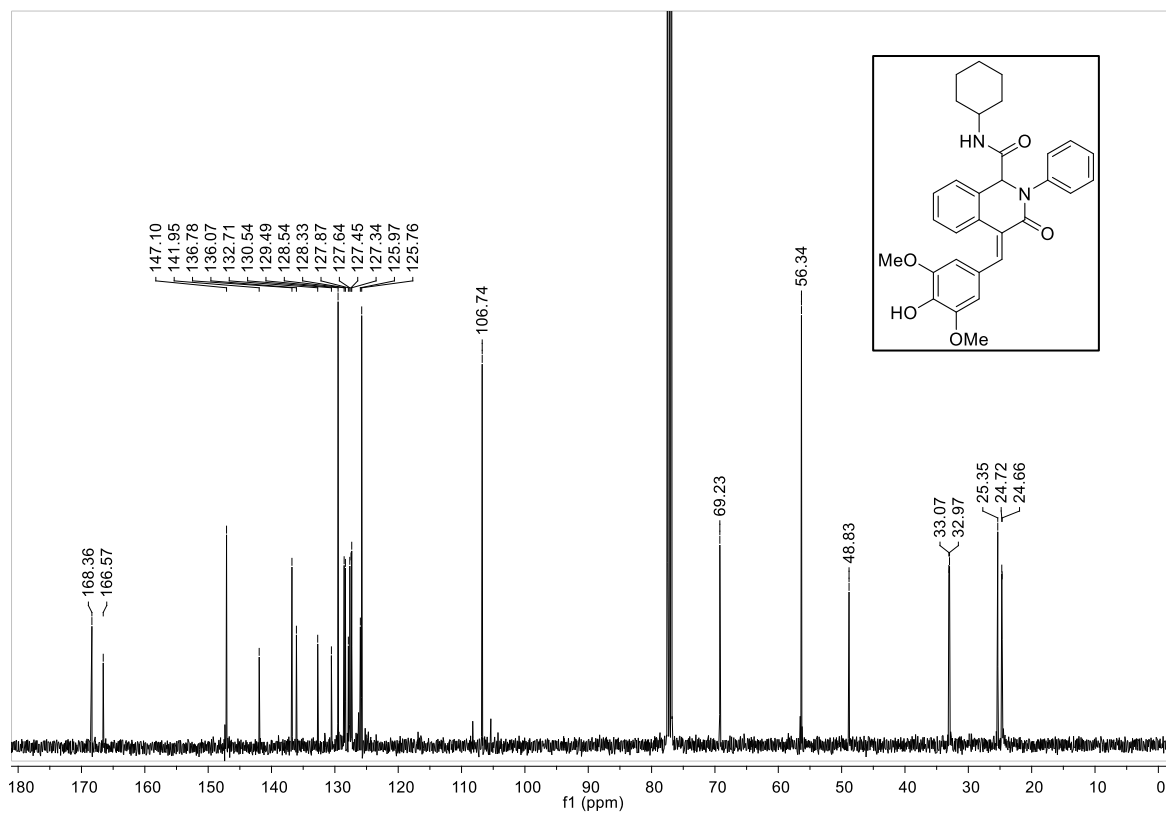

Figure S58. <sup>13</sup>C-NMR of 10j.

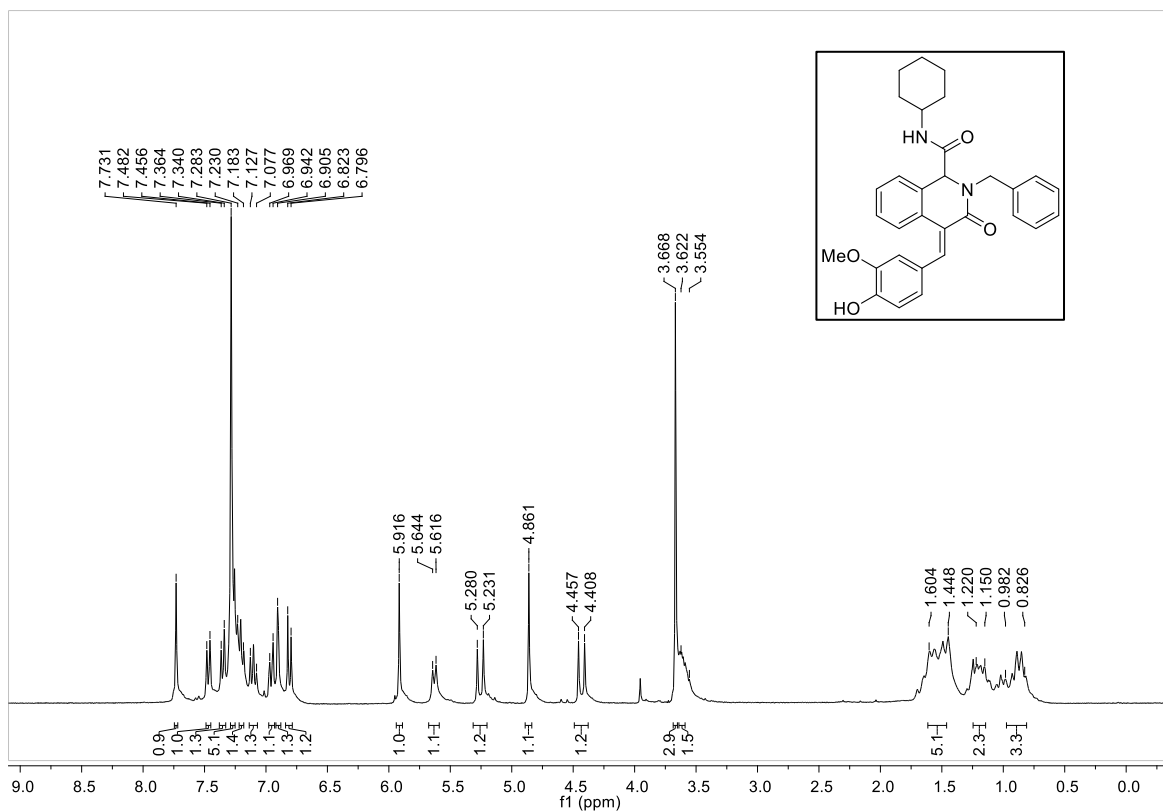

Figure S59. <sup>1</sup>H-NMR of 10k.

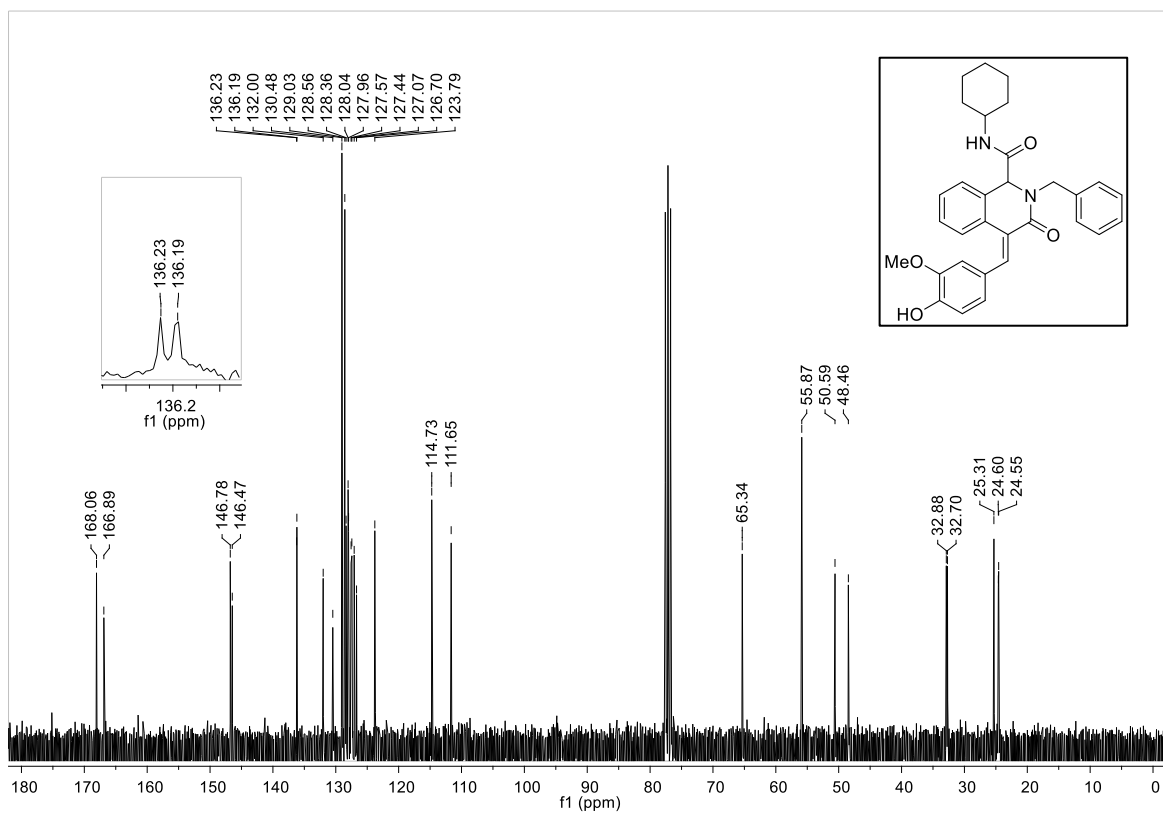

Figure S60. <sup>13</sup>C-NMR of 10k.

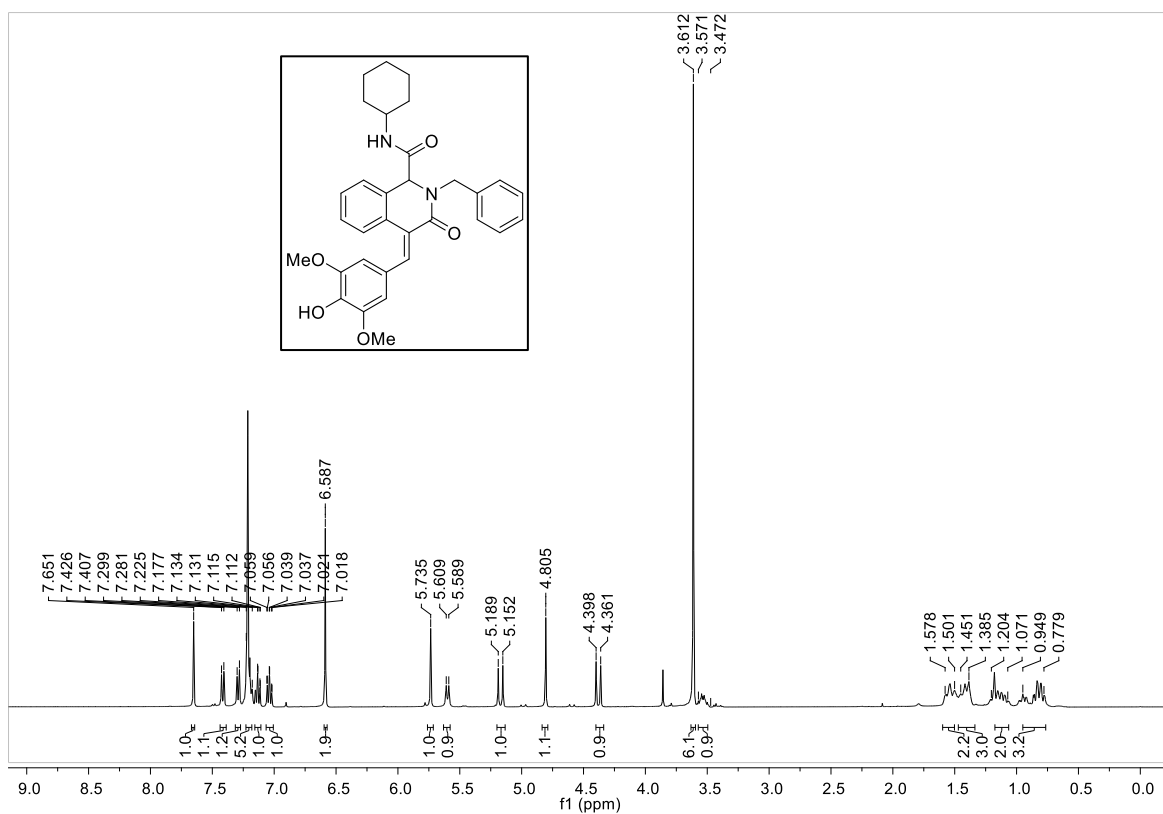

Figure S61. <sup>1</sup>H-NMR of 10l.

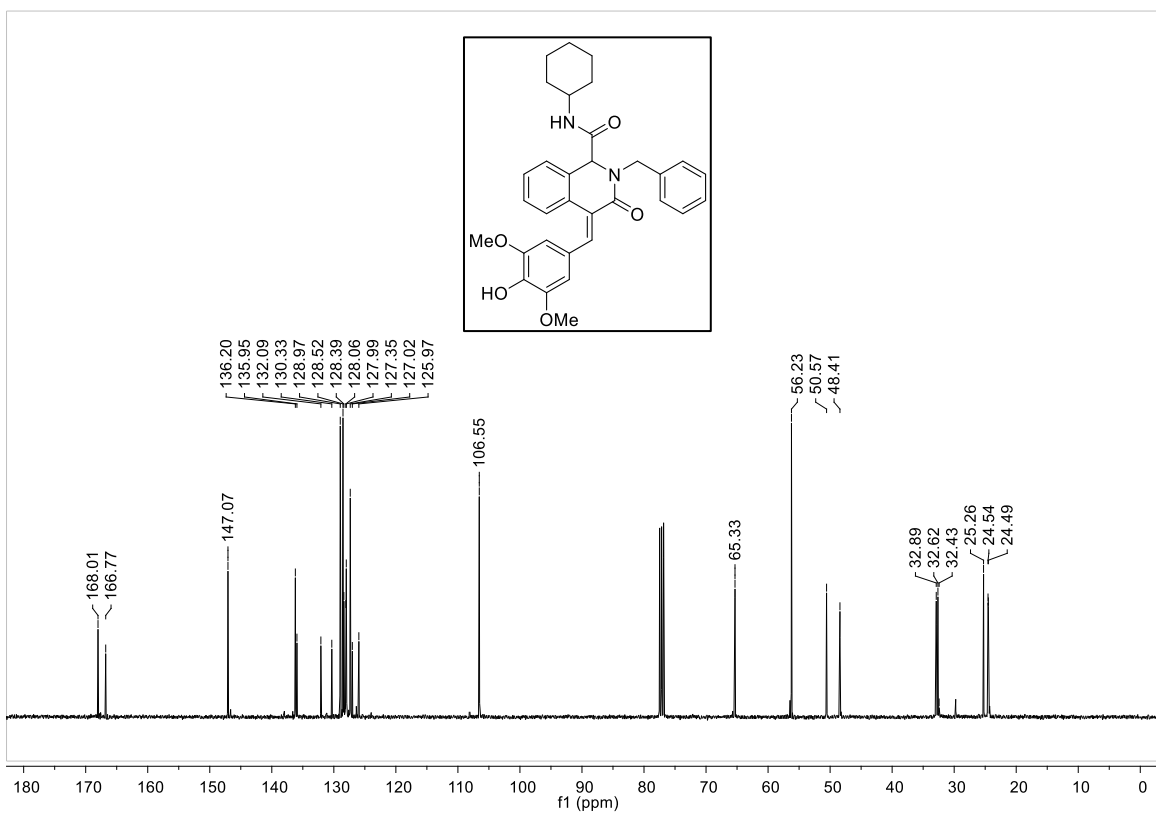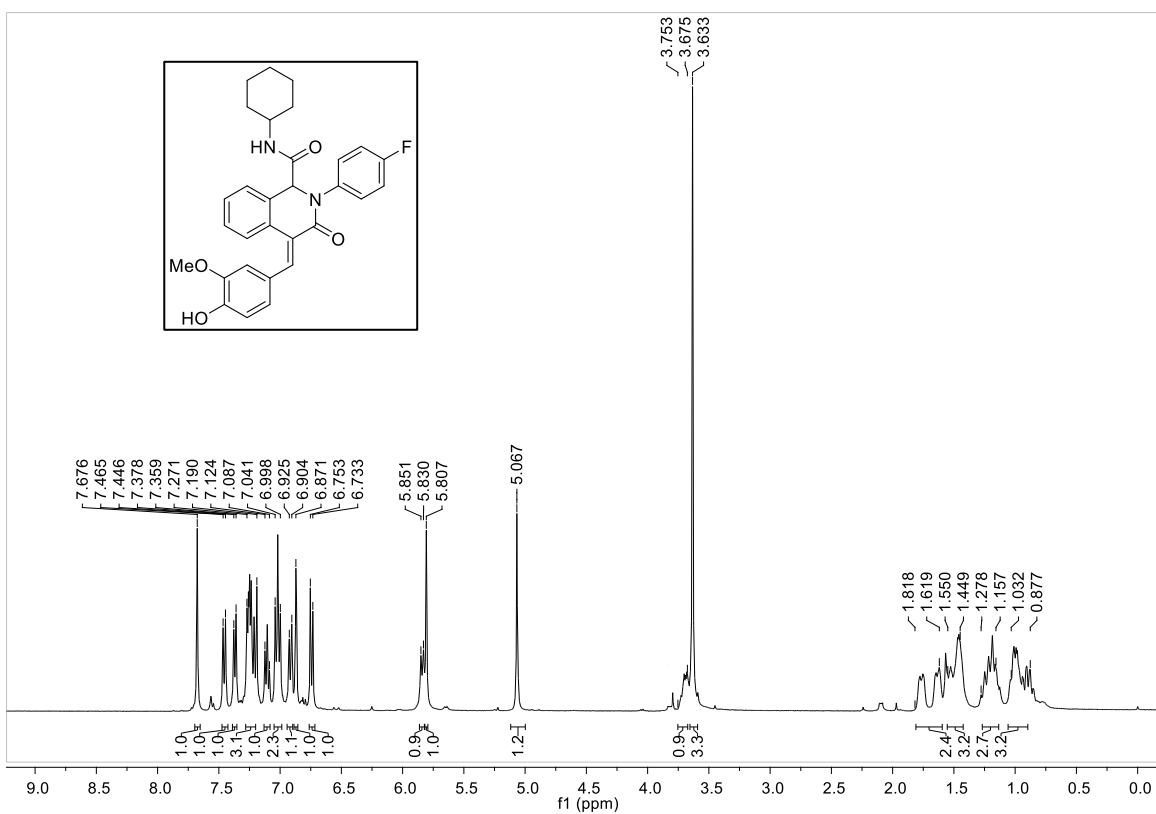



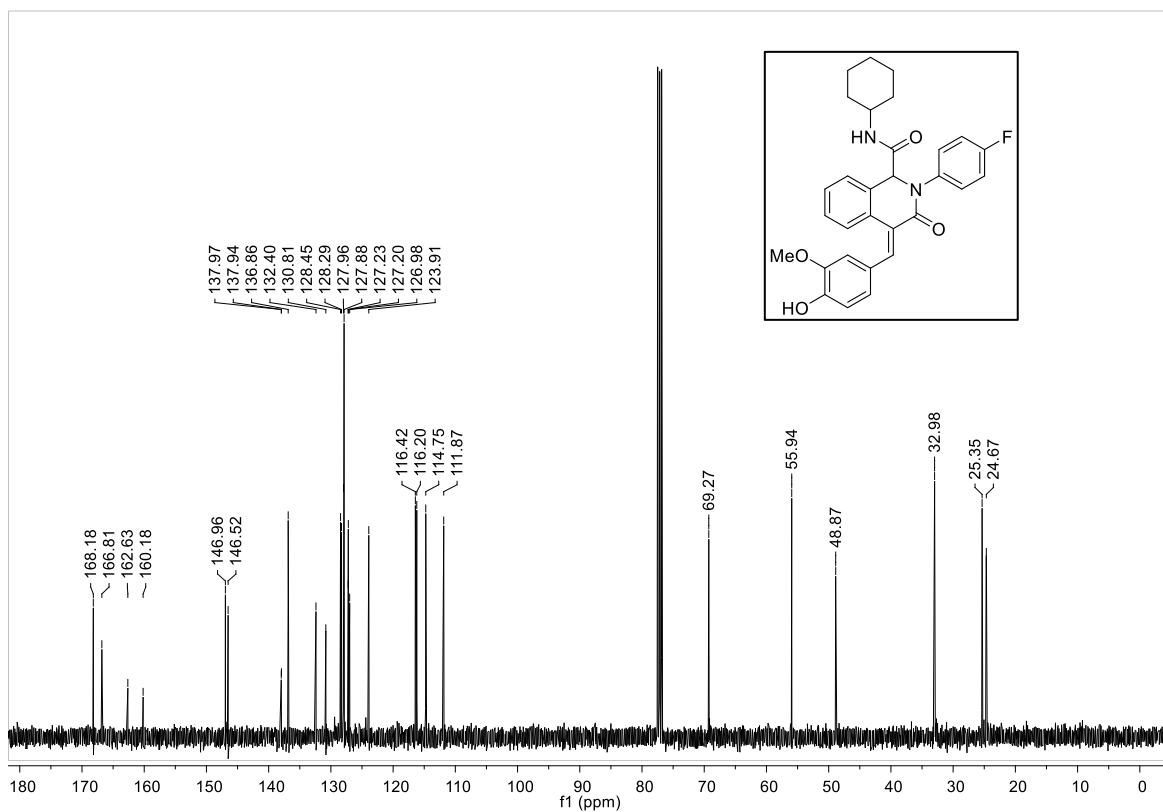

Figure S64.  $^{13}\text{C}$ -NMR of 10m.

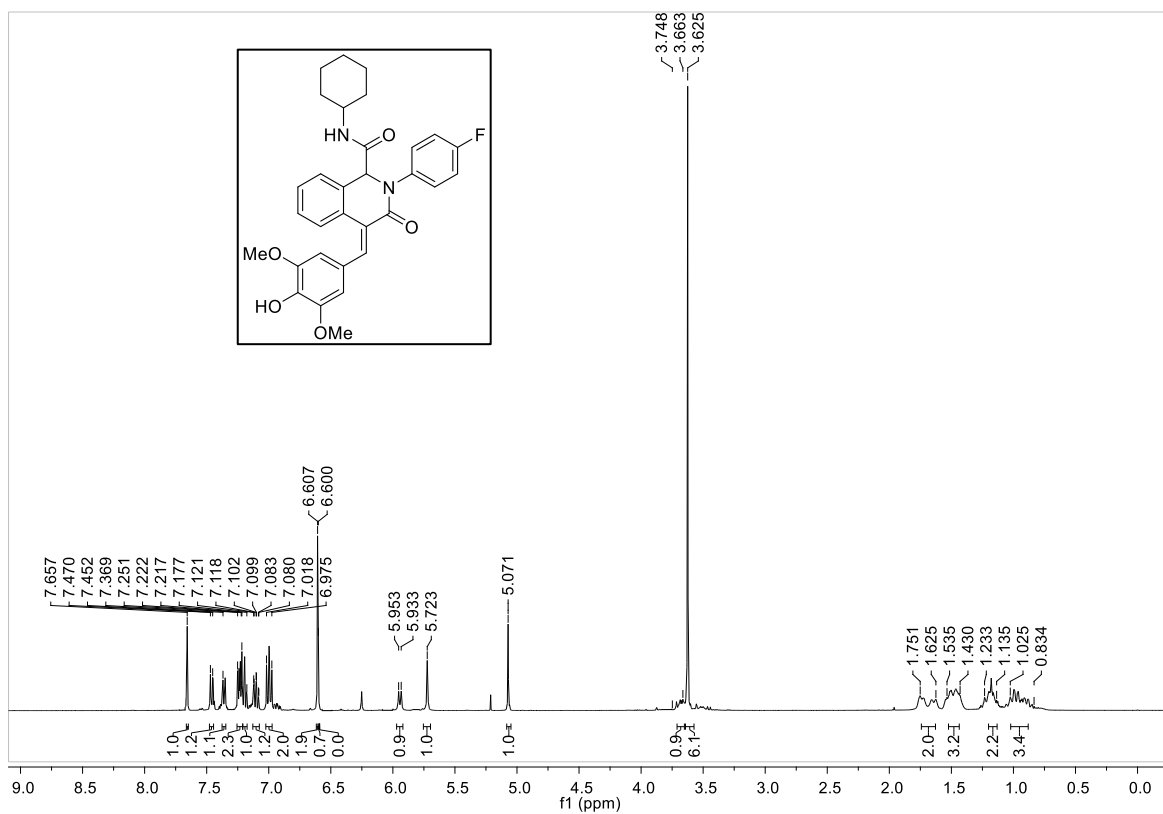

Figure S65.  $^1\text{H}$ -NMR of 10n.

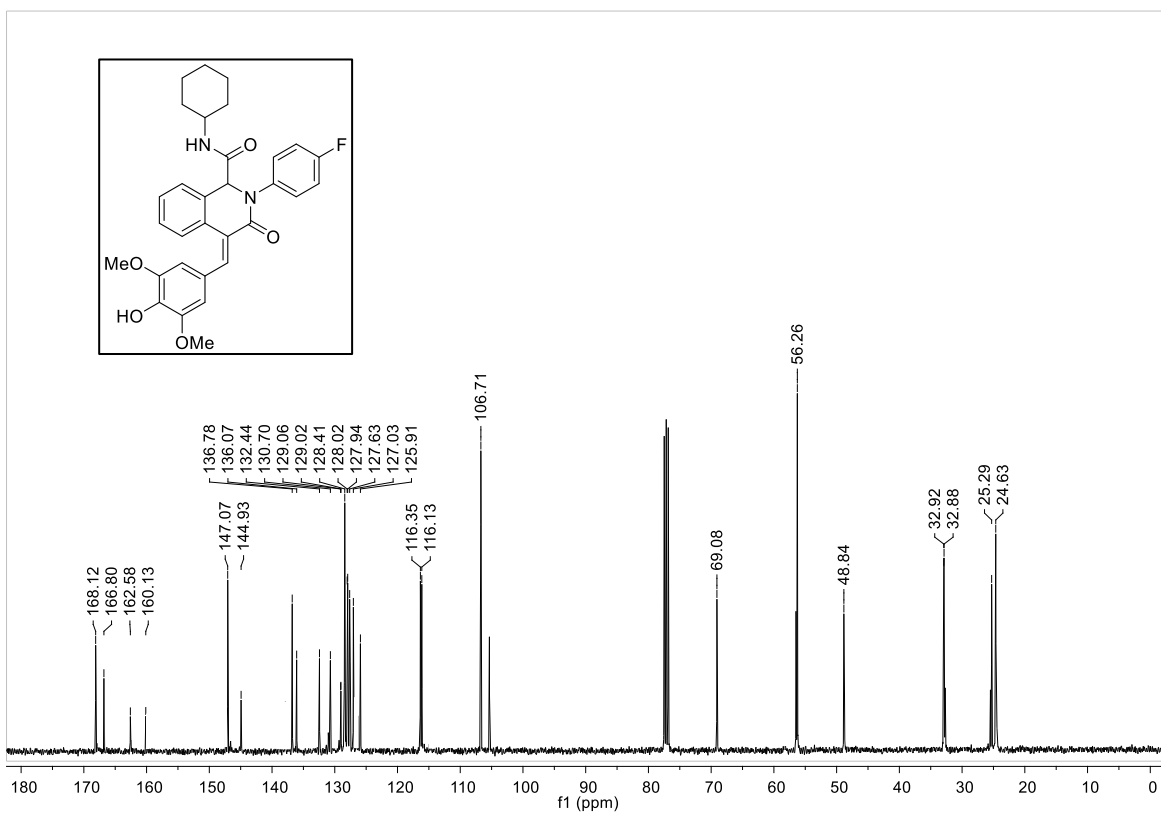

Figure S66. <sup>13</sup>C-NMR of 10n.

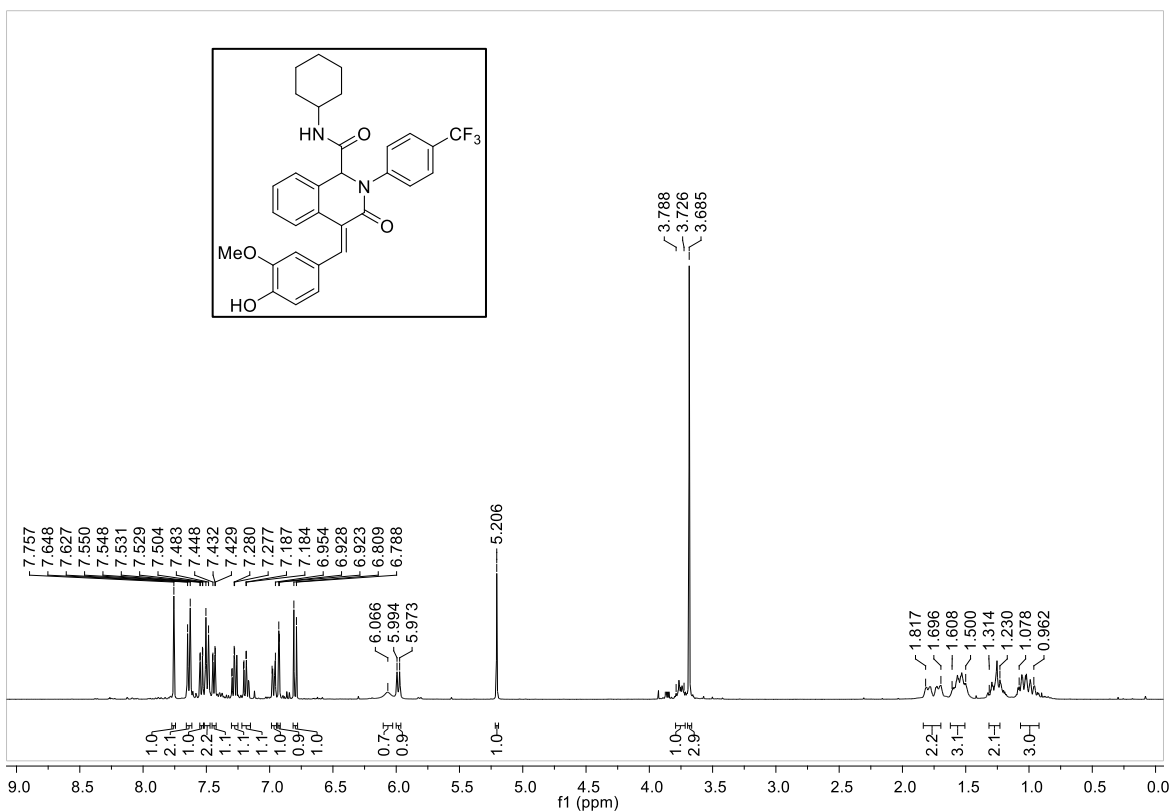

Figure S67. <sup>1</sup>H-NMR of 10o.

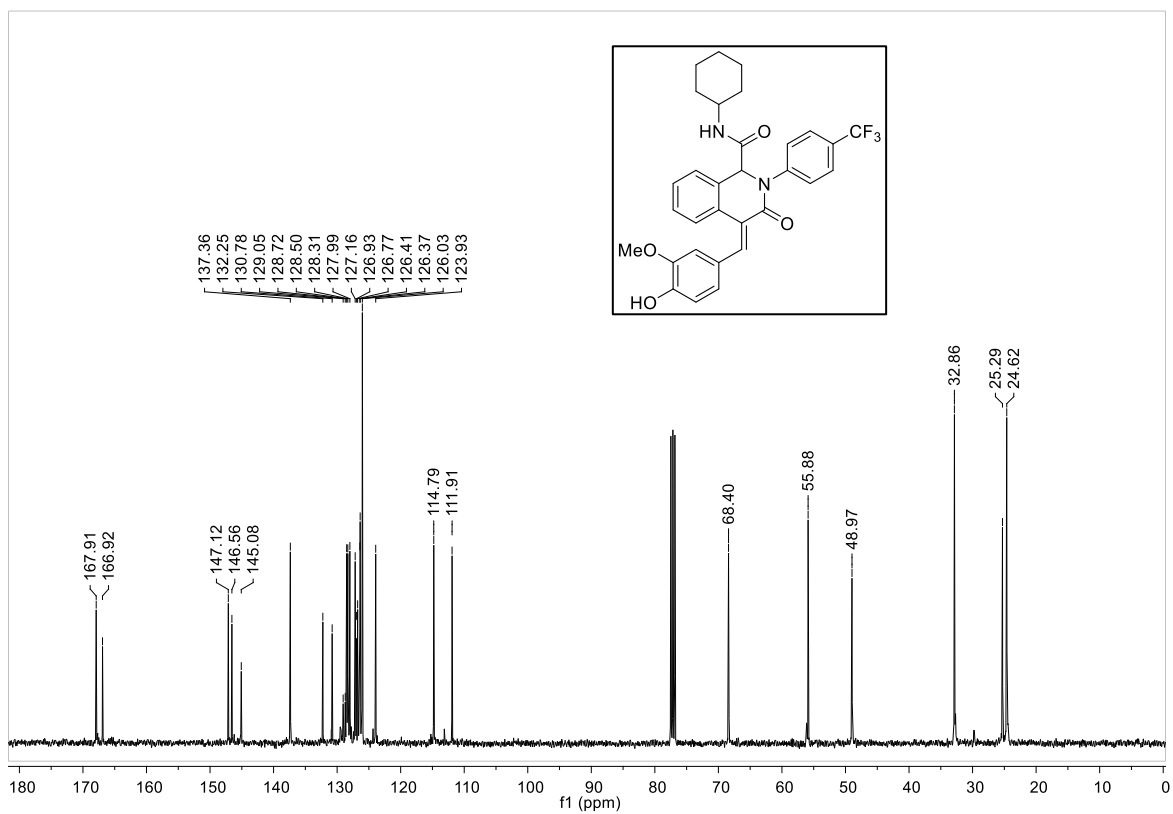

Figure S68.  $^{13}\text{C}$ -NMR of 10o.

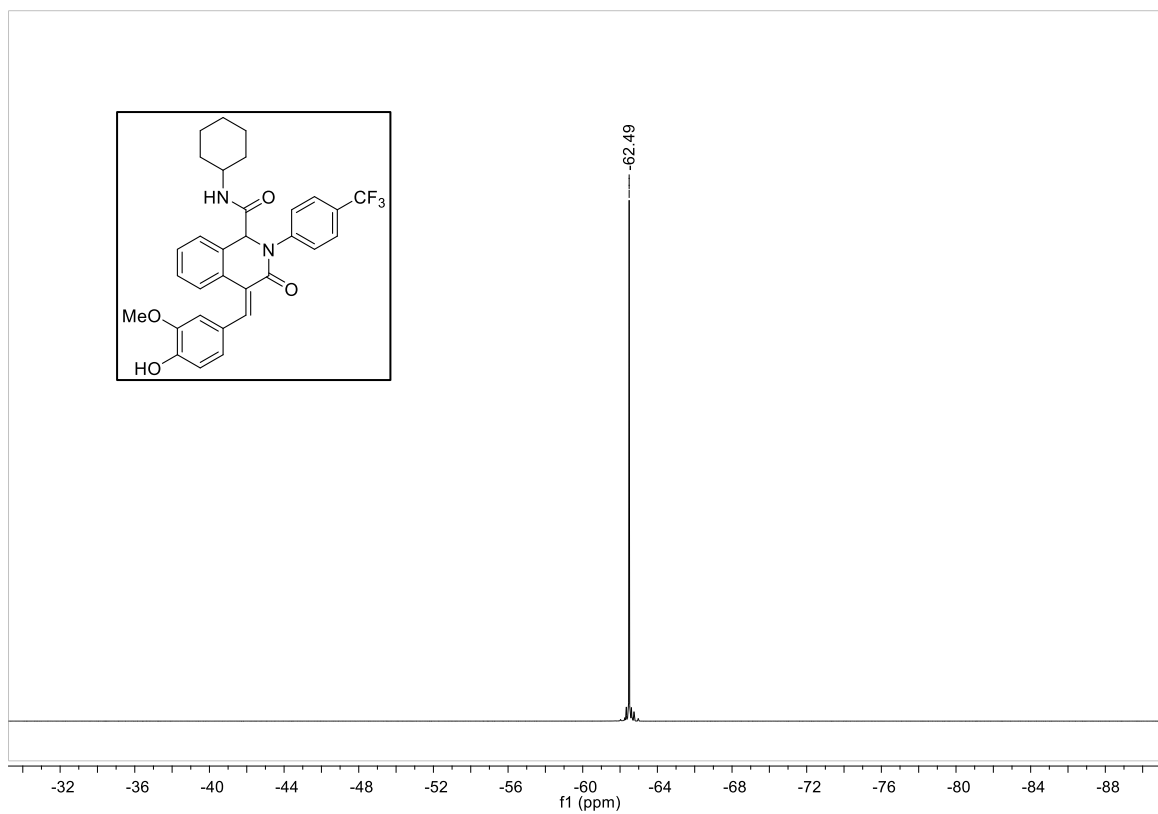

**Figure S69.**  $^{19}\text{F}$ -NMR of **10c**.

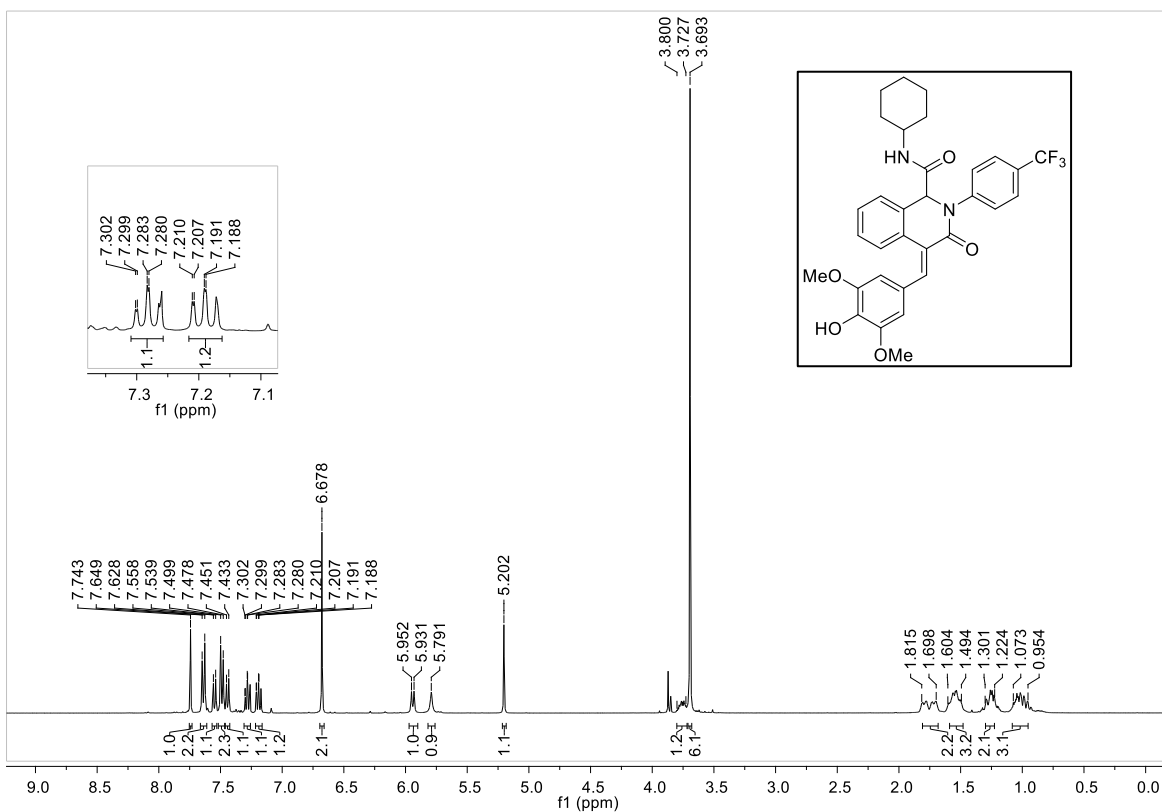

Figure S70.  $^{19}\text{F}$ -NMR of 10p.

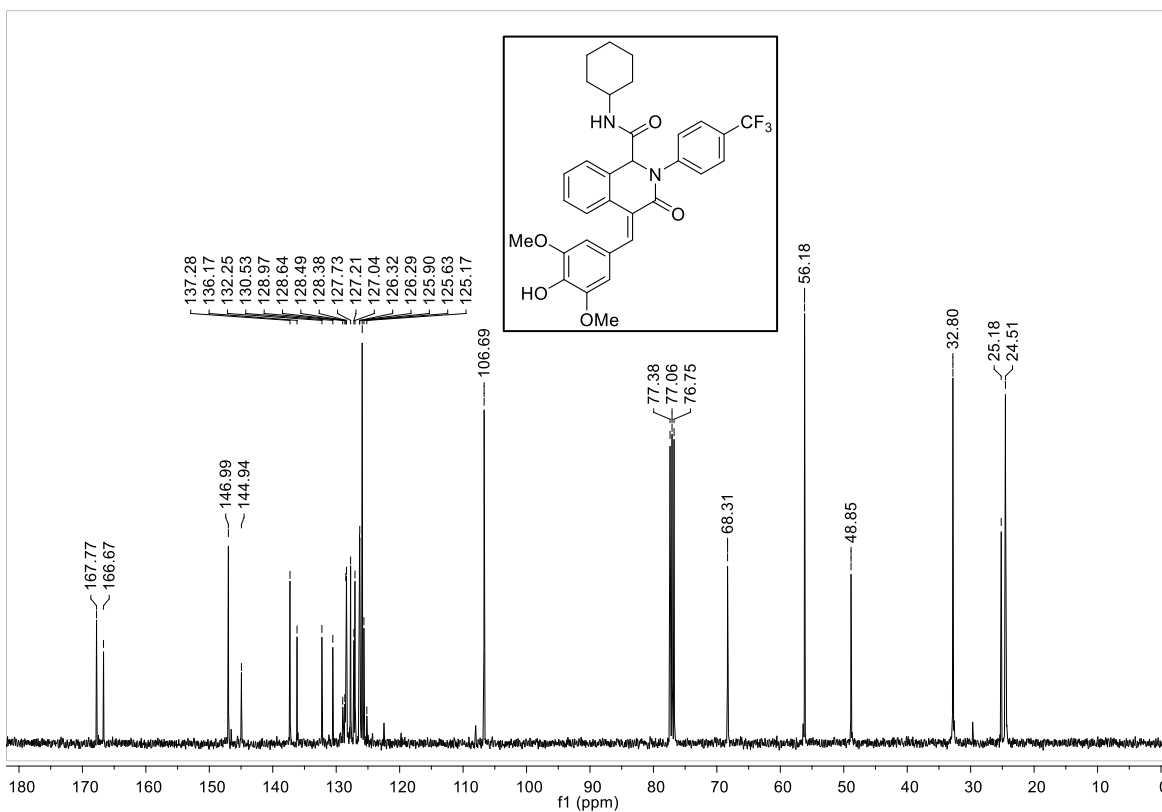

Figure S71.  $^{13}\text{C}$ -NMR of 10p.

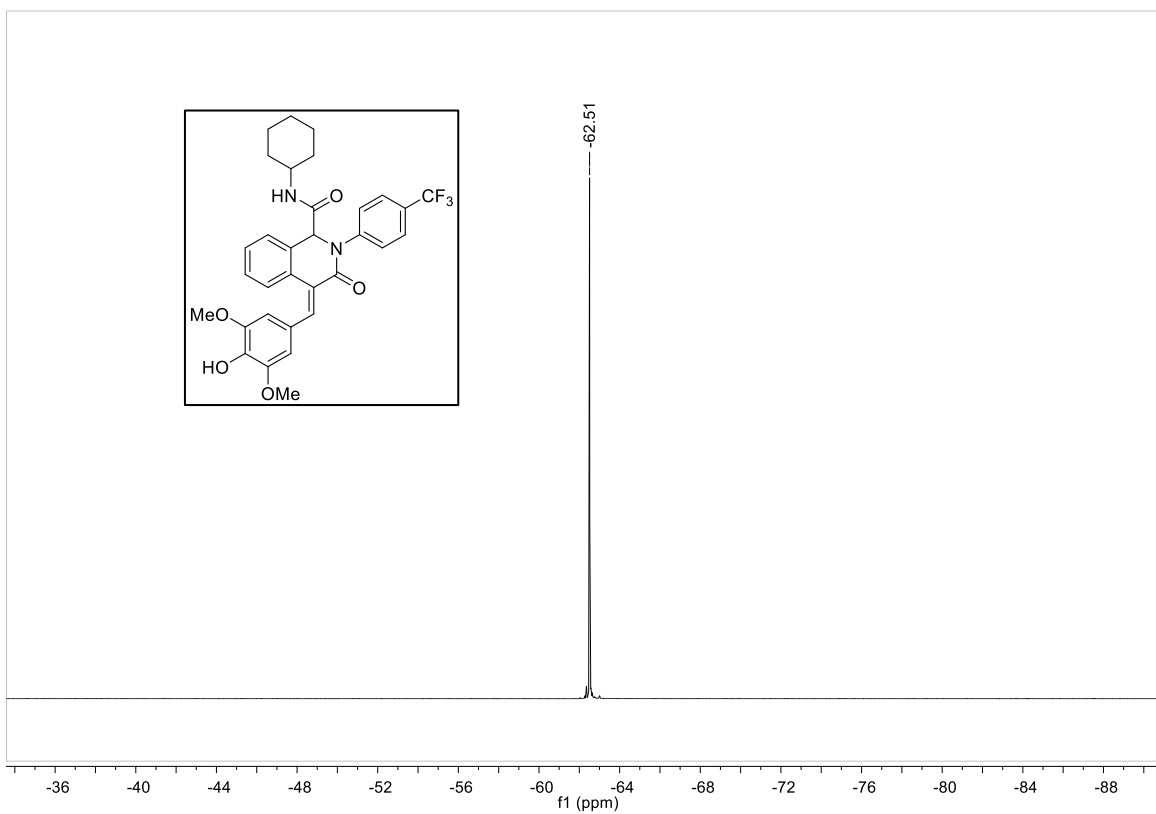

Figure S72.  $^{19}\text{F}$ -NMR of 10p.

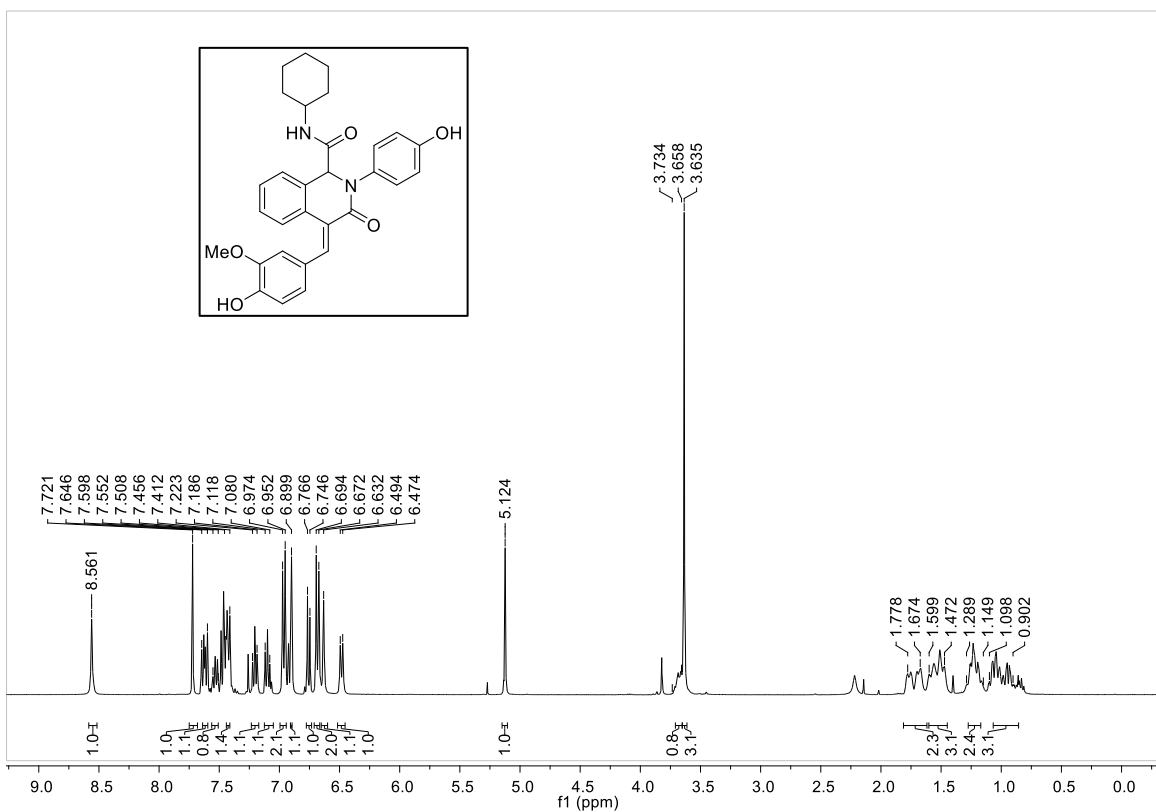

Figure S73. <sup>1</sup>H-NMR of 10q.

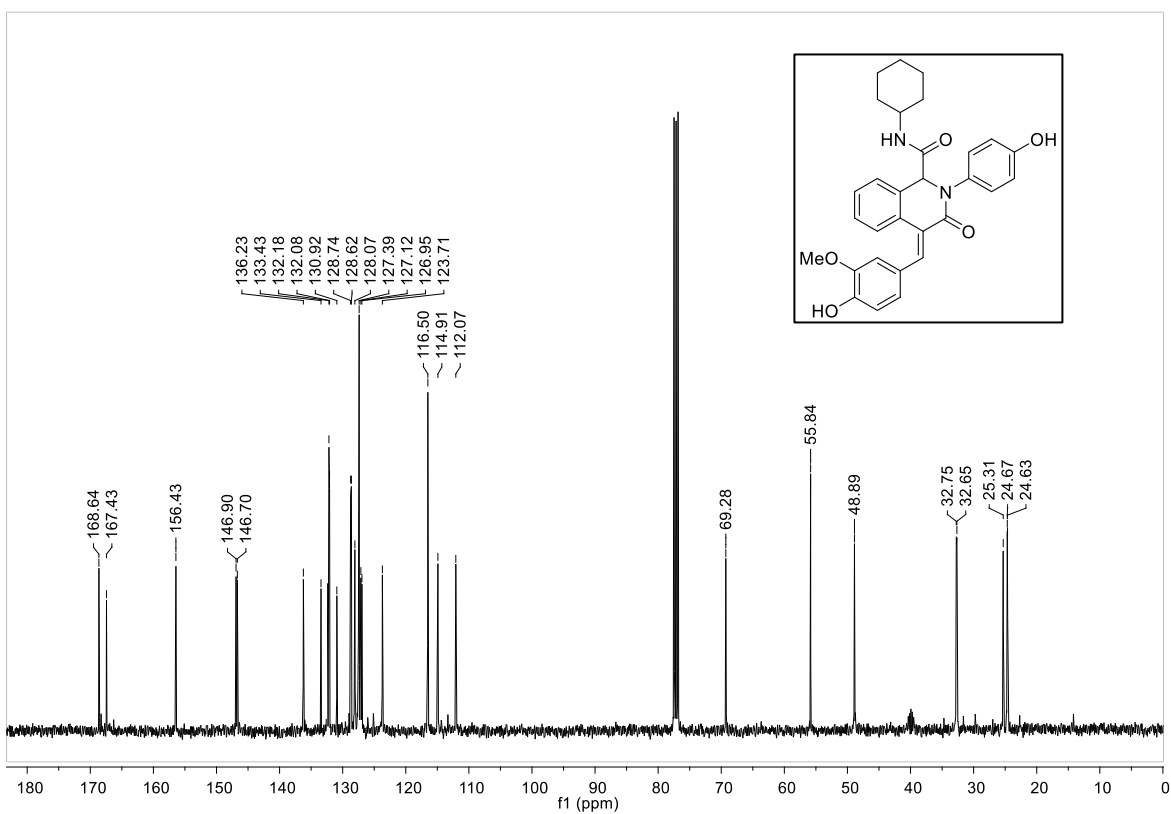

Figure S74. <sup>13</sup>C-NMR of 10q.

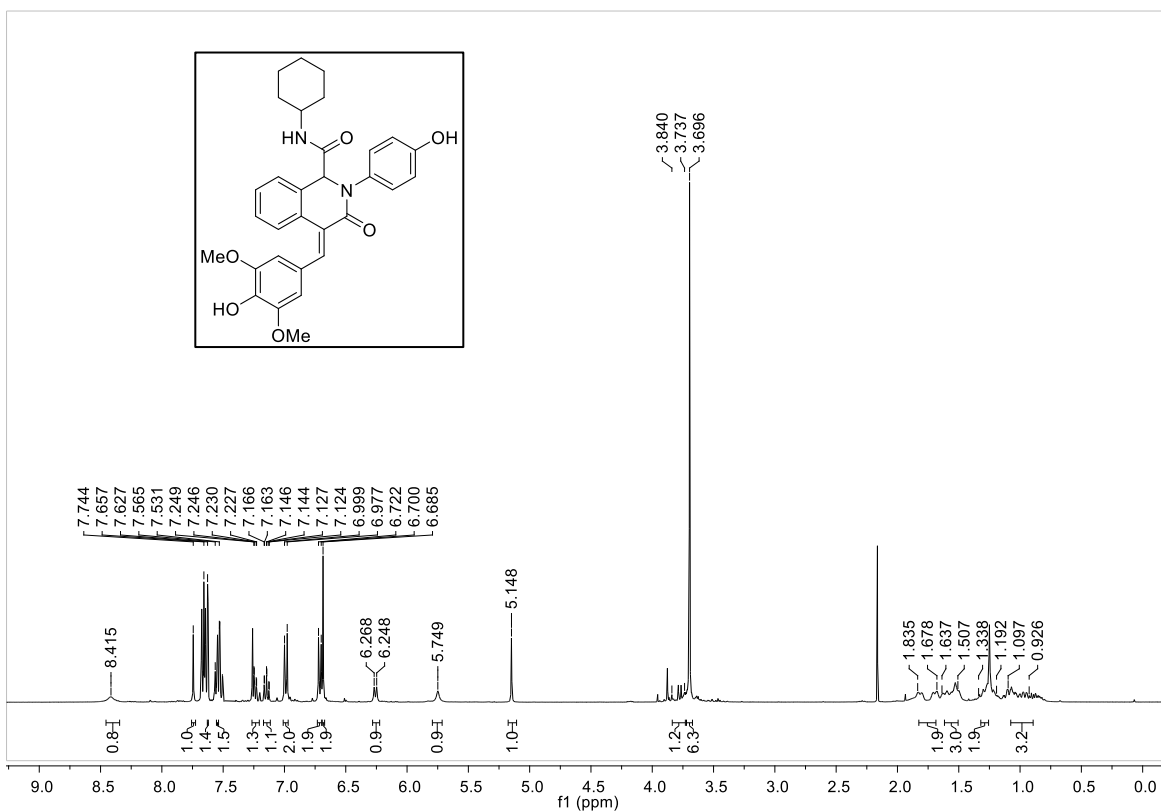

Figure S75. <sup>1</sup>H-NMR of 10r.

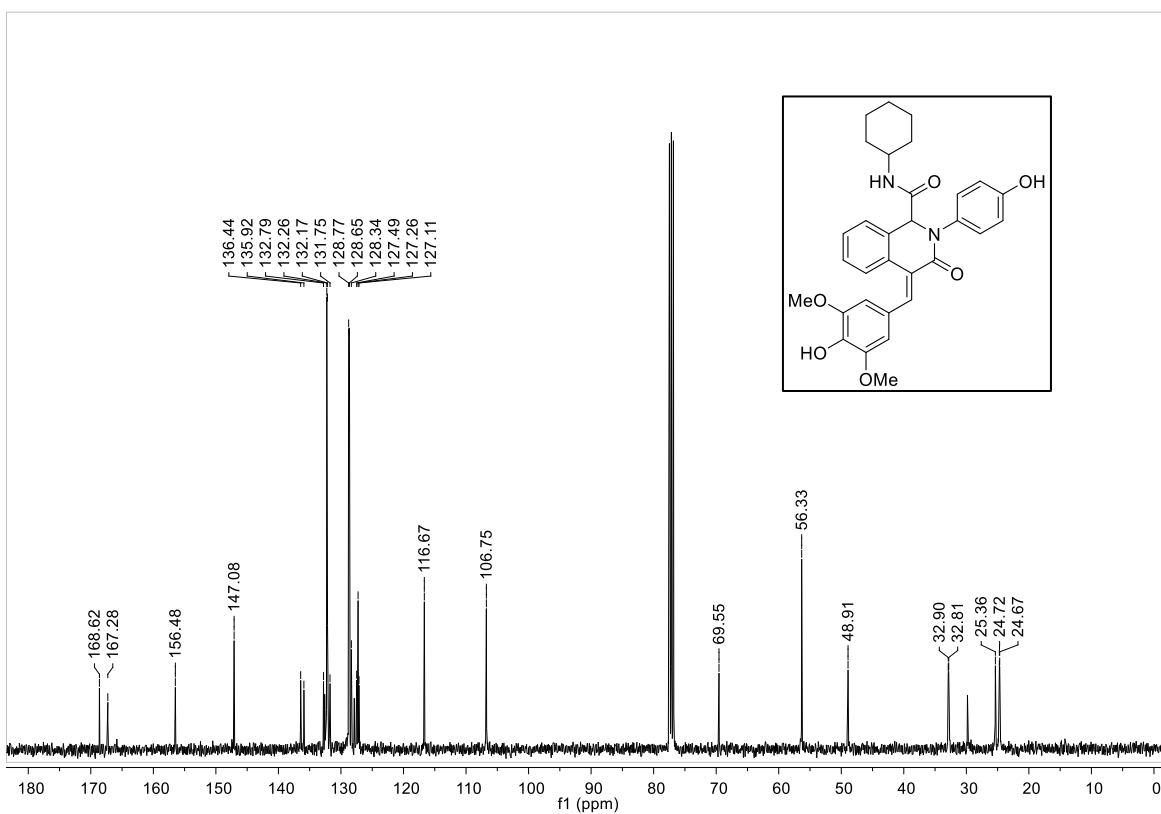

Figure S76. <sup>13</sup>C-NMR of 10r.



## X-Ray data

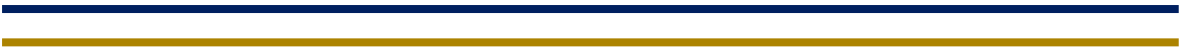



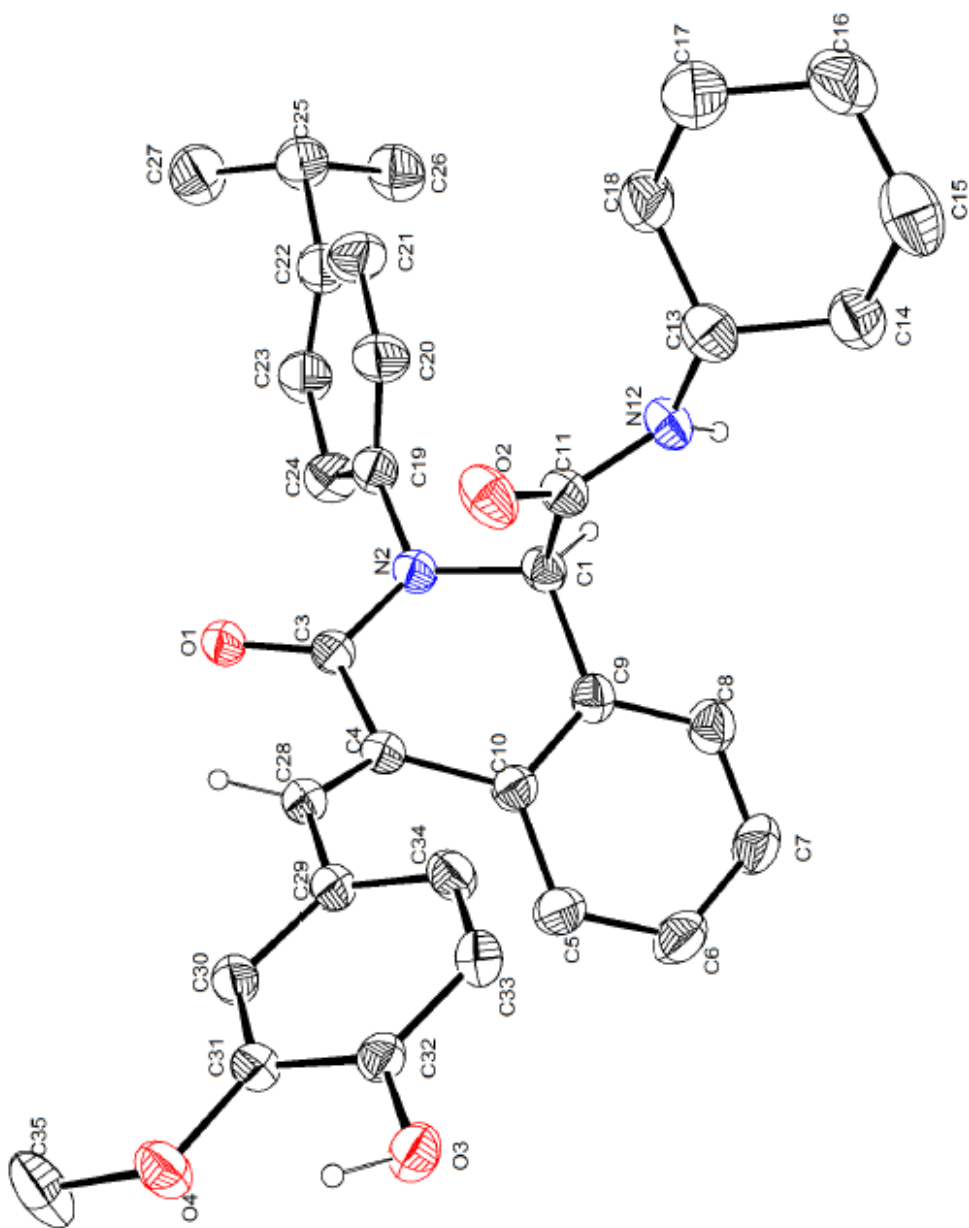

## **IC<sub>50</sub> data**

---

---

**Table S1.** TBARS IC<sub>50</sub> data of isoquinolinones and controls.

| Comp.       | Concentration (μM) | Percentage of inhibition (%) | IC <sub>50</sub> (μM) | Comp.        | Concentration (μM) | Percentage of inhibition (%) | IC <sub>50</sub> (μM) |
|-------------|--------------------|------------------------------|-----------------------|--------------|--------------------|------------------------------|-----------------------|
| <b>10c</b>  | Basal              | -                            | 2.43±0.10             | <b>10l</b>   | Basal              | -                            | 2.23±0.15             |
|             | Control            | -                            |                       |              | Control            | -                            |                       |
|             | 0.1                | 10.48±1.24                   |                       |              | 0.1                | 15.61±1.81                   |                       |
|             | 0.31               | 14.93±1.85                   |                       |              | 0.31               | 15.36±0.77                   |                       |
|             | 1                  | 28.33±1.57                   |                       |              | 1                  | 31.22±1.44                   |                       |
|             | 3.16               | 59.47±3.29                   |                       |              | 3.16               | 62.64±3.71                   |                       |
| 10          | 95.33±0.75         | 10                           | 93.93±1.42            |              |                    |                              |                       |
| <b>10d</b>  | Basal              | -                            | 11.30±1.69            | <b>10n</b>   | Basal              | -                            | 2.9±0.01              |
|             | Control            | -                            |                       |              | Control            | -                            |                       |
|             | 1                  | 14.27±0.79                   |                       |              | 0.1                | 5.25±2.08                    |                       |
|             | 3.16               | 28.00±2.86                   |                       |              | 0.31               | 9.23±5.71                    |                       |
|             | 10                 | 48.19±5.39                   |                       |              | 1                  | 21.99±4.09                   |                       |
|             | 31.62              | 70.84±5.61                   |                       |              | 3.16               | 51.75±0.75                   |                       |
| 100         | 78.84±3.28         | 10                           | 94.27±0.28            |              |                    |                              |                       |
| <b>10f</b>  | Basal              | -                            | 1.39±0.04             | <b>10p</b>   | Basal              | -                            | 1.55±0.33             |
|             | Control            | -                            |                       |              | Control            | -                            |                       |
|             | 0.1                | 13.41±0.78                   |                       |              | 0.1                | 9.24±1.75                    |                       |
|             | 0.31               | 19.75±2.05                   |                       |              | 0.31               | 16.99±0.52                   |                       |
|             | 1                  | 38.14±1.93                   |                       |              | 1                  | 34.99±2.67                   |                       |
|             | 3.16               | 84.58±3.71                   |                       |              | 3.16               | 81.6±5.02                    |                       |
| 10          | 96.86±0.24         | 10                           | 96.63±0.19            |              |                    |                              |                       |
| <b>10h</b>  | Basal              | -                            | 3.49±0.03             | <b>10q</b>   | Basal              | -                            | 22.69±3.21            |
|             | Control            | -                            |                       |              | Control            | -                            |                       |
|             | 0.1                | 5.23±1.37                    |                       |              | 1                  | 9.55±0.80                    |                       |
|             | 0.31               | 14.9±1.51                    |                       |              | 3.16               | 17.47±2.04                   |                       |
|             | 1                  | 23.48±0.18                   |                       |              | 10                 | 31.51±3.32                   |                       |
|             | 3.16               | 45.41±0.69                   |                       |              | 31.62              | 60.82±5.22                   |                       |
| 10          | 93.03±2.01         | 100                          | 96.39±0.46            |              |                    |                              |                       |
| <b>10i</b>  | Basal              | -                            | 19.24±2.71            | <b>10r</b>   | Basal              | -                            | 9.81±0.87             |
|             | Control            | -                            |                       |              | Control            | -                            |                       |
|             | 1                  | 13.64±2.75                   |                       |              | 1                  | 14.4±1.99                    |                       |
|             | 3.16               | 25.74±1.65                   |                       |              | 3.16               | 24.61±1.52                   |                       |
|             | 10                 | 35.57±4.20                   |                       |              | 10                 | 50.84±4.64                   |                       |
|             | 31.62              | 62.39±4.31                   |                       |              | 31.62              | 92.04±1.34                   |                       |
| 100         | 76.16±2.07         | 100                          | 97.24±0.10            |              |                    |                              |                       |
| <b>10j</b>  | Basal              | -                            | 4.75±0.55             | <b>α-TCP</b> | Basal              | -                            | 6.78±2.16<br>μM       |
|             | Control            | -                            |                       |              | Control            | -                            |                       |
|             | 1                  | 19.70±3.82                   |                       |              | 0.1                | 4.62±0.57                    |                       |
|             | 3.16               | 39.72±4.55                   |                       |              | 0.32               | 8.26±1.31                    |                       |
|             | 10                 | 74.00±2.95                   |                       |              | 1                  | 21.13±2.56*                  |                       |
|             | 31.62              | 96.34±0.73                   |                       |              | 3.16               | 44.84±6.74**                 |                       |
| 100         | 97.05±0.42         | 10                           | 59.00±3.71**          |              |                    |                              |                       |
| <b>Quer</b> | Basal              | -                            | 1.496±0.031<br>μM     |              |                    |                              |                       |
|             | Control            | -                            |                       |              |                    |                              |                       |
|             | 0.32               | 5.23±1.17                    |                       |              |                    |                              |                       |
|             | 0.56               | 10.93±1.20                   |                       |              |                    |                              |                       |
|             | 1                  | 27.88±2.05**                 |                       |              |                    |                              |                       |
|             | 1.78               | 62.68±1.93**                 |                       |              |                    |                              |                       |
|             | 3.16               | 85.23±2.81**                 |                       |              |                    |                              |                       |
| 5.62        | 94.90±1.13**       |                              |                       |              |                    |                              |                       |
| 10          | 95.65±1.24**       |                              |                       |              |                    |                              |                       |

**Table S2.**  $\alpha$ -glucosidase inhibition IC<sub>50</sub> data of isoquinolinones, acarbose and quercetin.

| Comp.      | Concentration ( $\mu$ M) | Percentage of inhibition (%) | IC <sub>50</sub> ( $\mu$ M) | Comp.      | Concentration ( $\mu$ M) | Percentage of inhibition (%) | IC <sub>50</sub> ( $\mu$ M) |
|------------|--------------------------|------------------------------|-----------------------------|------------|--------------------------|------------------------------|-----------------------------|
| <b>10a</b> | Control                  | -                            | 50.63 $\pm$ 2.28            | <b>10j</b> | Control                  | -                            | 60.08 $\pm$ 1.18            |
|            | 31.62                    | 3.48 $\pm$ 9.53              |                             |            | 31.62                    | 9.46 $\pm$ 2.22              |                             |
|            | 42.17                    | 15.17 $\pm$ 6.62             |                             |            | 42.17                    | 16.16 $\pm$ 1.25             |                             |
|            | 56.23                    | 26.77 $\pm$ 4.37             |                             |            | 56.23                    | 39.92 $\pm$ 1.95             |                             |
|            | 74.13                    | 55.81 $\pm$ 3.43             |                             |            | 74.13                    | 81.08 $\pm$ 4.6              |                             |
| 100        | 78.40 $\pm$ 3.34         | 100                          | 91.61 $\pm$ 0.78            |            |                          |                              |                             |
| <b>10b</b> | Control                  | -                            | 68.04 $\pm$ 0.28            | <b>10k</b> | Control                  | -                            | 50.05 $\pm$ 3.07            |
|            | 31.62                    | 3.20 $\pm$ 0.90              |                             |            | 31.62                    | 2.95 $\pm$ 8.24              |                             |
|            | 42.17                    | 7.27 $\pm$ 0.94              |                             |            | 42.17                    | 12.72 $\pm$ 9.92             |                             |
|            | 56.23                    | 14.80 $\pm$ 1.81             |                             |            | 56.23                    | 21.19 $\pm$ 8.46             |                             |
|            | 74.13                    | 36.95 $\pm$ 1.32             |                             |            | 74.13                    | 58.10 $\pm$ 3.43             |                             |
| 100        | 81.70 $\pm$ 1.12         | 100                          | 96.50 $\pm$ 3.08            |            |                          |                              |                             |
| <b>10c</b> | Control                  | -                            | >100                        | <b>10l</b> | Control                  | -                            | 61.31 $\pm$ 1.72            |
|            | 1                        | 2.06                         |                             |            | 31.62                    | 5.34 $\pm$ 1.41              |                             |
|            | 10                       | 5.00                         |                             |            | 42.17                    | 15.57 $\pm$ 2.27             |                             |
|            | 100                      | 35.74                        |                             |            | 56.23                    | 38.04 $\pm$ 3.17             |                             |
| <b>10d</b> | Control                  | -                            | 31.49 $\pm$ 0.82            | <b>10m</b> | Control                  | -                            | 52.47 $\pm$ 4.16            |
|            | 10                       | 6.80 $\pm$ 1.14              |                             |            | 31.62                    | 2.44 $\pm$ 4.49              |                             |
|            | 17.78                    | 16.48 $\pm$ 2.97             |                             |            | 42.17                    | 7.34 $\pm$ 5.38              |                             |
|            | 31.62                    | 49.24 $\pm$ 3.40             |                             |            | 56.23                    | 18.4 $\pm$ 4.68              |                             |
|            | 56.23                    | 94.79 $\pm$ 1.39             |                             |            | 74.13                    | 58.04 $\pm$ 7.71*            |                             |
|            | 100                      | 93.83 $\pm$ 0.28             |                             |            | 100                      | 93.68 $\pm$ 2.35*            |                             |
| <b>10e</b> | Control                  | -                            | 14.75 $\pm$ 0.30            | <b>10n</b> | Control                  | -                            | 57.21 $\pm$ 0.17            |
|            | 31.62                    | 20.65 $\pm$ 8.36             |                             |            | 10                       | 3.40 $\pm$ 0.53              |                             |
|            | 42.17                    | 19.24 $\pm$ 6.89             |                             |            | 17.78                    | 4.02 $\pm$ 1.08              |                             |
|            | 56.23                    | 32.35 $\pm$ 2.57             |                             |            | 31.62                    | 11.89 $\pm$ 0.35             |                             |
|            | 74.13                    | 63.31 $\pm$ 1.92             |                             |            | 56.23                    | 47.97 $\pm$ 0.47             |                             |
|            | 100                      | 91.32 $\pm$ 2.47             |                             |            | 100                      | 95.49 $\pm$ 0.20             |                             |
| <b>10f</b> | Control                  | -                            | 33.07 $\pm$ 1.73            | <b>10o</b> | Control                  | -                            | 13.70 $\pm$ 0.56            |
|            | 10                       | 17.12 $\pm$ 1.56             |                             |            | 31.62                    | 15.44 $\pm$ 3.93             |                             |
|            | 17.78                    | 27.92 $\pm$ 0.71             |                             |            | 42.17                    | 20.94 $\pm$ 4.83             |                             |
|            | 31.62                    | 49.46 $\pm$ 2.63             |                             |            | 56.23                    | 37.88 $\pm$ 2.29             |                             |
|            | 56.23                    | 82.83 $\pm$ 10.5             |                             |            | 74.13                    | 63.16 $\pm$ 3.29             |                             |
|            | 100                      | 90.90 $\pm$ 7.47             |                             |            | 100                      | 91.05 $\pm$ 2.19             |                             |
| <b>10g</b> | Control                  | -                            | 30.22 $\pm$ 1.07            | <b>10p</b> | Control                  | -                            | >100                        |
|            | 31.62                    | -4.39 $\pm$ 8.8              |                             |            | 10                       | 4.98 $\pm$ 3.20              |                             |
|            | 42.17                    | 13.73 $\pm$ 5.79             |                             |            | 17.78                    | 13.05 $\pm$ 2.30             |                             |
|            | 56.23                    | 52.30 $\pm$ 5.04             |                             |            | 31.62                    | 15.65 $\pm$ 0.99             |                             |
|            | 74.13                    | 97.78 $\pm$ 1.47             |                             |            | 56.23                    | 21.96 $\pm$ 4.74             |                             |
|            | 100                      | 95.22 $\pm$ 5.37             |                             |            | 100                      | 34.00 $\pm$ 4.24             |                             |

| Comp.           | Concentration (μM) | Percentage of inhibition (%) | IC <sub>50</sub> (μM) | Comp.       | Concentration (μM) | Percentage of inhibition (%) | IC <sub>50</sub> (μM) |
|-----------------|--------------------|------------------------------|-----------------------|-------------|--------------------|------------------------------|-----------------------|
| <b>10h</b>      | Control            | -                            | 44.37±2.39            | <b>10q</b>  | Control            | -                            | 92.78±1.31            |
|                 | 31.62              | 21.56±2.94                   |                       |             | 10                 | 2.17±0.98                    |                       |
|                 | 42.17              | 44.11±8.54                   |                       |             | 17.78              | 2.17±0.03                    |                       |
|                 | 56.23              | 80.64±5.47                   |                       |             | 31.62              | 5.55±0.71                    |                       |
|                 | 74.13              | 91.25±4.82                   |                       |             | 56.23              | 10.91±0.53                   |                       |
|                 | 100                | 94.91±3.25                   |                       |             | 100                | 66.49±5.48                   |                       |
| <b>10i</b>      | Control            | -                            | 50.52±1.81            | <b>10r</b>  | Control            | -                            | >100                  |
|                 | 31.62              | 13.44±1.36                   |                       |             | 10                 | 2.74±1.97                    |                       |
|                 | 42.17              | 29.26±3.22                   |                       |             | 17.78              | 8.59±1.1                     |                       |
|                 | 56.23              | 66.33±7.01                   |                       |             | 31.62              | 9.5±1.46                     |                       |
|                 | 74.13              | 91.27±1.91                   |                       |             | 56.23              | 8.32±4.81                    |                       |
|                 | 100                | 98.64±2.26                   |                       |             | 100                | 29.08±2.17                   |                       |
| <b>Acarbose</b> | Control            | -                            | 4687.06±21<br>9.50    | <b>Quer</b> | Control            | -                            | 15.61±1.68            |
|                 | 2040.09            | 29.9±2.17                    |                       |             | 1                  | 6.71±0.40                    |                       |
|                 | 3628.27            | 43.14±1.64                   |                       |             | 1.78               | 12.14±1.29                   |                       |
|                 | 6456.00            | 59.17±1.66                   |                       |             | 3.16               | 24.24±4.94                   |                       |
|                 | 11478.77           | 72.54±1.55                   |                       |             | 5.62               | 53.39±8.74                   |                       |
|                 | 20413.87           | 82.93±0.10                   |                       |             | 10                 | 82.89±3.44                   |                       |

# Cytotoxicity





**Table S3.** Percentage of inhibition against healthy cell line COS-7 of selected isoquinolinones at 50  $\mu$ M.

| <b>Compound</b> | <b>Percentage of growth inhibition of COS-7</b> |
|-----------------|-------------------------------------------------|
| <b>10e</b>      | 5.0                                             |
| <b>10f</b>      | NC                                              |
| <b>10g</b>      | NC                                              |
| <b>10o</b>      | NC                                              |
| <b>10p</b>      | 7.6                                             |

Cytotoxicity assay was performed in accordance to our previous works without modifications.<sup>1</sup>

<sup>1</sup> Á. Ramírez-Trinidad, K. Carrillo-Jaimes, J. A. Rivera-Chávez and E. Hernández-Vázquez, *Med Chem Res*, 2023, **32**, 144–157.

## **Sucrose tolerance assay**

---

---

The area under the curve of sucrose tolerance test is shown herein.

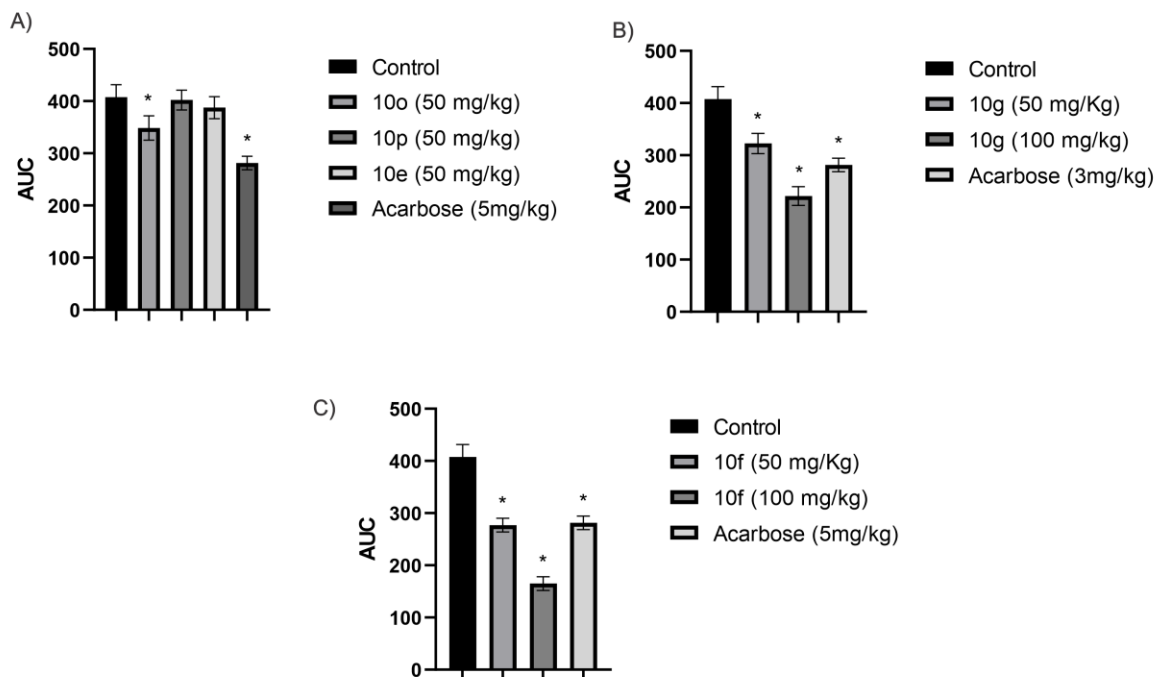

**Figure S77.** AUC of sucrose tolerance test. A) Less active compounds; only **10o** showed a significant reduction of glucose; b) Compound **10g**; c) Compound **10f**. Both compounds show a dose-dependent glucose reduction. \*p < 0.05.

## **Glucose tolerance assay**

---

---

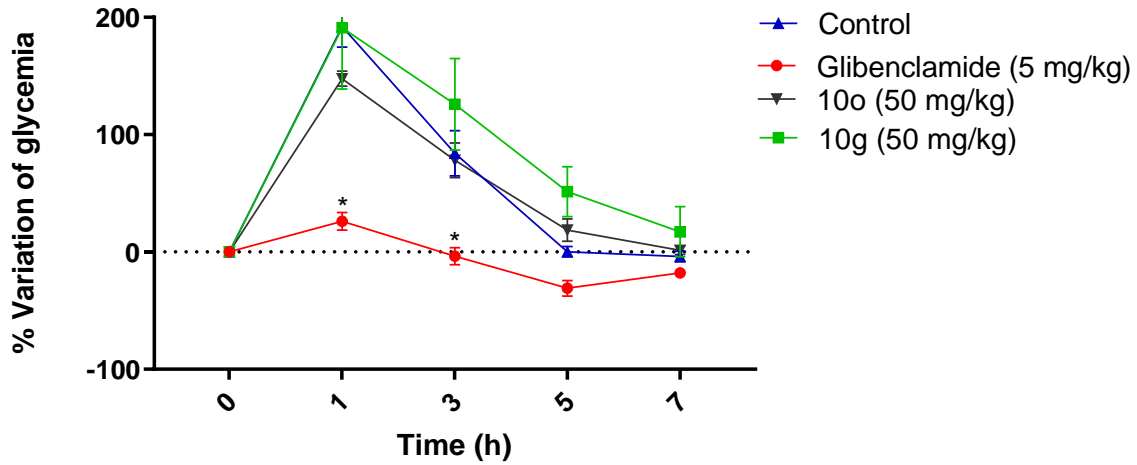

**Figure S78.** Oral glucose tolerance test of **10g** and **10o**, along with glibenclamide. No glucose reduction was observed with the isoquinolines. \* $p < 0.05$ .

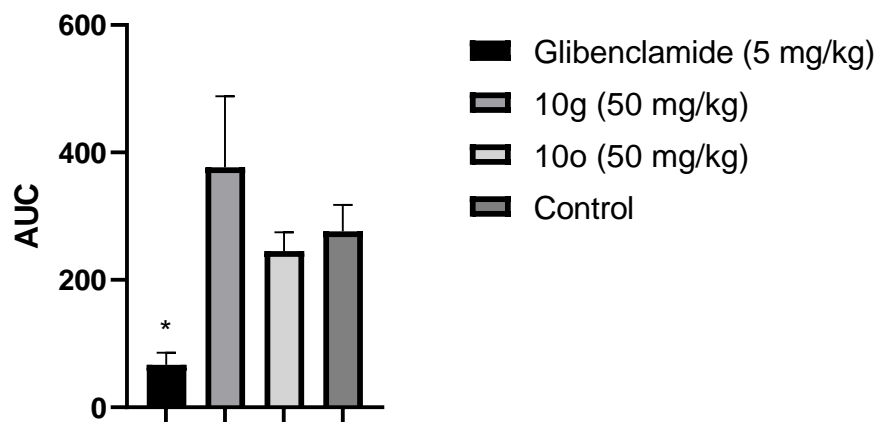

**Figure S79.** AUC of GTA. Only glibenclamide showed a significant difference against control.

\* $p < 0.05$ .
